# Supplementary material for: Amine-promoted three-component cycloaddition of bicyclo[1.1.0]butanes with hydroxylamine and polyformaldehyde: expedient access to 2-oxa-3-azabicyclo[3.1.1]heptanes
Source: Royal Society of Chemistry journal article supplement (doi:10.1039/d4gc05355a), 2025-01-01

## Supplementary Information

# Amine-promoted three-component cycloaddition of bicyclo[1.1.0]butanes with hydroxylamine and polyformaldehyde: expedient access to 2-oxa-3-azabicyclo[3.1.1]heptanes

Yu Zhu,<sup>a</sup> Xueli Lv,<sup>b</sup> Jun Hong,<sup>a</sup> Shengxing Wu,<sup>a</sup> Zhi Li,<sup>a</sup> Minyan Wang<sup>\*b</sup> and Xinpeng Jiang<sup>\*a</sup>

<sup>a</sup> College of Pharmaceutical Sciences, Zhejiang University of Technology, Hangzhou, Zhejiang 310014, P.R. China. Email: xjiang@zjut.edu.cn

<sup>b</sup> State Key Laboratory of Coordination Chemistry, School of Chemistry and Chemical Engineering, Nanjing University, Nanjing, Jiangsu 210093, P. R. China. Email: wangmy@nju.edu.cn

### Table of Contents

|                                                                                                       |     |
|-------------------------------------------------------------------------------------------------------|-----|
| 1. General information .....                                                                          | S2  |
| 2. Synthesis of substrates <b>1</b> .....                                                             | S2  |
| 3. Synthesis of substrates <b>2</b> .....                                                             | S3  |
| 4. General method .....                                                                               | S4  |
| 5. Optimization of the reaction conditions .....                                                      | S5  |
| 6. Control experiments .....                                                                          | S6  |
| a) Radical inhibiting experiment.....                                                                 | S6  |
| b) Intermediate trapping experiment.....                                                              | S6  |
| 7. Gram-scale synthesis of <b>4a</b> and derivatization of products <b>4</b> and <b>5</b> .....       | S6  |
| a) Gram-scale synthesis of compound <b>4a</b> .....                                                   | S6  |
| b) Synthesis of products <b>6</b> and <b>7</b> .....                                                  | S7  |
| 8. Characterization of products .....                                                                 | S7  |
| 9. DFT computations .....                                                                             | S20 |
| 10. Crystallographic data for compound <b>4a</b> and <b>5i</b> .....                                  | S46 |
| 11. References.....                                                                                   | S48 |
| 12. Copies of <sup>1</sup> H, <sup>13</sup> C NMR, and <sup>19</sup> F NMR spectra of compounds ..... | S49 |

## 1. General information

Commercially available reagents and solvents were used without any purification. The progress of the reactions was monitored by TLC with silica gel plates, and the visualization was carried out under UV light (254 nm). Melting points were determined using a Büchi B-540 capillary melting point apparatus. NMR spectra were recorded using Bruker Avance III 400 MHz spectrometers and Bruker Avance III 600 MHz spectrometers. Chemical shifts of  $^1\text{H}$  NMR were reported relative to the solvent signal ( $\text{CDCl}_3$ :  $\delta = 7.26$  ppm;  $\text{DMSO-}d_6$ :  $\delta = 2.50$  ppm;  $\text{Acetone-}d_6 = 2.05$  ppm). Chemical shifts of  $^{13}\text{C}$  NMR were reported relative to the solvent signal ( $\text{CDCl}_3$ :  $\delta = 77.00$  ppm;  $\text{DMSO-}d_6$ :  $\delta = 39.50$  ppm.  $\text{Acetone-}d_6 = 29.84$  ppm). HRMS spectra were recorded on an electrospray ionization quadrupole time-of-flight (ESI-Q-TOF) mass spectrometer. Column chromatography was performed on silica gel (300-400 mesh).

## 2. Synthesis of substrates 1

Preparation of bicyclo[1.1.0]butanes<sup>[1]</sup> **1a-1n**. Typical procedure.

(1) Preparation of *tert*-butyl 3-phenylbicyclo[1.1.0]butane-1-carboxylate (**1l**)

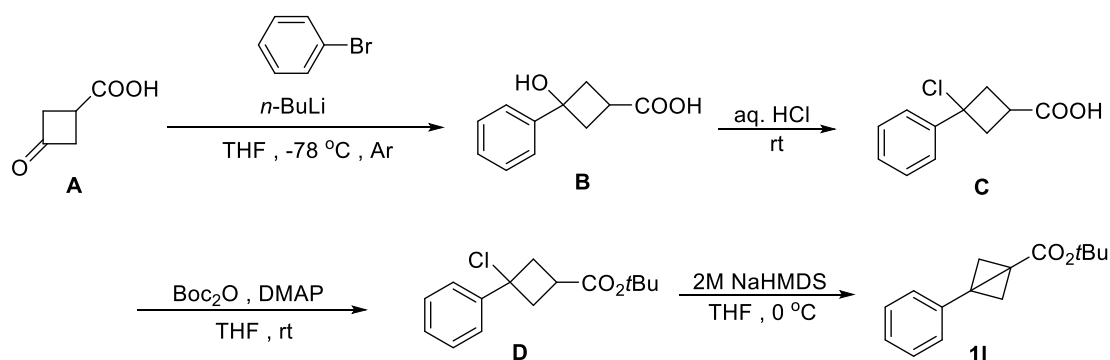

Step 1: To a solution of aromatic bromide (2.2 equiv.) in anhydrous THF (0.7 M), *n*-BuLi (2.5 M, 2.2 equiv.) was added dropwise at -78 °C under an argon atmosphere. The reaction mixture was stirred for 1 hour at -78 °C, and then a solution of 3-oxocyclobutane-1-carboxylic acid (1.0 equiv.) in anhydrous THF (2.5 M) was added in one portion, the temperature rising to -25 °C. The mixture was stirred for an additional hour and subsequently quenched with a saturated aqueous solution of  $\text{NH}_4\text{Cl}$  and  $\text{H}_2\text{O}$  (3:2). The reaction mixture was then diluted with hexane, and the organic layer was separated and washed with water. The aqueous layers were combined, acidified with a 2 M solution of  $\text{NaHSO}_4$ , and extracted with MTBE. The organic phase was washed with brine, dried over  $\text{Na}_2\text{SO}_4$ , filtered, and concentrated under reduced pressure. The resulting crude material was used directly in the subsequent step without further

purification.

Step 2: To a solution of phenylcyclobutane-1-carboxylic acid (1.0 eq.) in toluene (0.8 M), concentrated HCl (12 eq.) was added dropwise at room temperature. The resulting mixture was stirred at room temperature overnight. The organic phase was separated, washed successively with water and brine (2 times), dried over Na<sub>2</sub>SO<sub>4</sub>, filtered, and concentrated under reduced pressure to yield the title compound. The crude product was used directly in the subsequent step without further purification.

Step 3: To a solution of 3-chloro-phenylcyclobutane-1-carboxylic acid (1.0 eq.) in THF (0.3 M), di-*tert*-butyl dicarbonate (Boc<sub>2</sub>O, 1.2 eq.) and 4-dimethylaminopyridine (DMAP, 0.05 eq.) were added. The reaction mixture was stirred at room temperature overnight, then concentrated under reduced pressure. The residue was dissolved in a 1:1 mixture of MTBE and hexane. The solution was washed sequentially with 1 M NaHSO<sub>4</sub>, 1 M NaHCO<sub>3</sub>, and brine, then filtered through silica gel. The organic phase was concentrated under reduced pressure, and the resulting residue was purified by flash chromatography, eluting with a gradient from hexanes to 10% ethyl acetate in hexanes.

Step 4: To a solution of 3-chloro-3-phenylcyclobutane-1-carboxylate (1.0 eq.) in THF (0.4 M), a 2 M solution of NaHMDS (1.2 eq.) was added dropwise at 0–5 °C under an argon atmosphere. The resulting mixture was stirred for 1 hour at the same temperature, after which a 25% aqueous solution of NH<sub>4</sub>Cl was added dropwise. The reaction mixture was then diluted with hexane (25 mL). The organic layer was separated, washed with brine, dried over Na<sub>2</sub>SO<sub>4</sub>, filtered through silica gel, and concentrated under reduced pressure. The residue was purified by flash chromatography, using a gradient elution from hexanes to 10% ethyl acetate in hexanes.

### 3. Synthesis of substrates **2**

Preparation of hydroxylamines<sup>[2]</sup> **2a-2m**. Typical procedure.

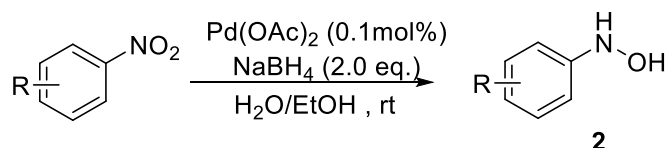

Step: In a 20 mL flask, Pd(OAc)<sub>2</sub> (0.1 mL of a 10 mM Pd(OAc)<sub>2</sub>/CH<sub>2</sub>Cl<sub>2</sub> solution) was added to a stirred suspension or solution of nitroarene (1.0 mmol) and NaBH<sub>4</sub> (2.0 mmol) in a mixture of H<sub>2</sub>O (4.0 mL) and EtOH (6.0 mL). The reaction mixture was stirred at room temperature for the required time (3–

8 minutes), as monitored by TLC. The reaction was then extracted with  $\text{CH}_2\text{Cl}_2$ . The combined organic layers were dried over  $\text{MgSO}_4$ , filtered, and concentrated under reduced pressure. The resulting residue was recrystallized from  $\text{CH}_2\text{Cl}_2/n$ -hexane to yield the desired products **2**.

#### 4. General method

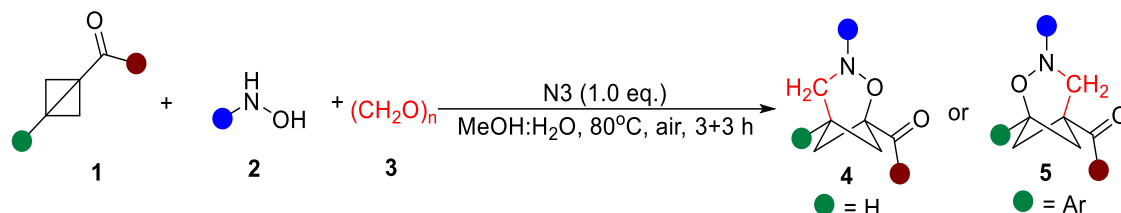

An oven-dried 10 mL reaction tube equipped with a magnetic stir bar was charged with **1** (0.2 mmol, 1.0 eq), **2** (0.4 mmol, 2.0 eq), Polyformaldehyde (1.2 mmol, 6.0 eq), **N3** (0.2 mmol, 1.0 eq), MeOH (1.5 mL), and  $\text{H}_2\text{O}$  (0.5 mL). The reaction mixture was placed in a preheated metal block and stir at  $80^\circ\text{C}$ , after reacting 3 h, another 2.0 equivalents of **2a** was added, and then react for 3 h. After the reaction was complete as monitored by TLC, it was quenched with saturated NaCl solution (5 mL) at room temperature, and then extracted with DCM ( $10\text{ mL} \times 3$ ). The organic layers were combined, washed with brine, dried over  $\text{Na}_2\text{SO}_4$ , filtered, and then concentrated in vacuum. The residue was purified by flash chromatography on silica gel to afford the desired product **4** or **5**.

## 5. Optimization of the reaction conditions

**Table S1. The screening of additives**<sup>a</sup>

$\text{1a} + \text{2a} + (\text{CH}_2\text{O})_n \xrightarrow[\text{80 } ^\circ\text{C, Air, 3 h}]{\text{additives, anhydrous MeOH}} \text{4a}$

|                                              |  |                                  |  |                        |  |
|----------------------------------------------|--|----------------------------------|--|------------------------|--|
|                                              |  |                                  |  |                        |  |
|                                              |  |                                  |  |                        |  |
| N,N,N',N'',N''-pentamethyldiethylenetriamine |  | 1,3,5-trimethyl-1,3,5-triazinane |  | hexamethylenetetramine |  |

| Entry           | Additives                                    | Yield (%)            |
|-----------------|----------------------------------------------|----------------------|
| 1               | Et <sub>2</sub> NH                           | 50                   |
| 2               | Ph <sub>2</sub> NH                           | 43                   |
| 3               | piperazine                                   | 49                   |
| 4               | Et <sub>3</sub> N                            | 45                   |
| 5               | DABCO                                        | 27                   |
| 6               | quinuclidine                                 | 39                   |
| 7               | DBU                                          | 49                   |
| 8               | TBD                                          | 38                   |
| 9               | MTBD                                         | 38                   |
| 10 <sup>c</sup> | Et <sub>2</sub> NH                           | 73(71) <sup>b</sup>  |
| 11 <sup>c</sup> | N,N,N',N'',N''-pentamethyldiethylenetriamine | 58                   |
| 12 <sup>c</sup> | 1,3,5-trimethyl-1,3,5-triazinane             | 82 (77) <sup>b</sup> |
| 13 <sup>c</sup> | hexamethylenetetramine                       | 64                   |

<sup>a</sup> Reaction condition: **1a** (0.2 mmol), **2a** (0.4 mmol), polyformaldehyde **3** (1.2 mmol), additive (0.2 mmol), anhydrous MeOH (2 mL), 80 °C, 3h. Yields were determined by <sup>1</sup>H NMR analysis of the unpurified reaction mixture with 1,3,5-trimethoxybenzene as an internal standard. <sup>b</sup> Isolated yield after chromatographic purification in brackets. <sup>c</sup> solvent: MeOH: H<sub>2</sub>O = 3:1.

## 6. Control experiments

### a) Radical inhibiting experiment

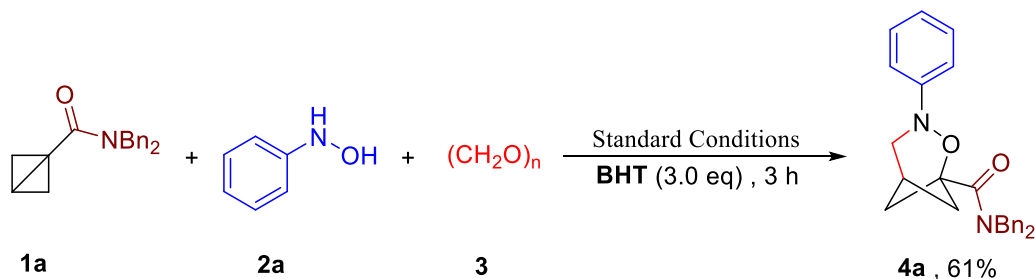

An oven-dried 10 mL Schlenk tube was charged with **1a** (55.5 mg, 0.2 mmol), BHT (132 mg, 0.6 mmol), **2a** (44 mg, 0.4 mmol), Polyformaldehyde (36 mg, 1.2 mmol) and **N3** (25.8 mg, 0.2 mmol) in MeOH (1.5 mL) and H<sub>2</sub>O (0.5 mL). The reaction mixture was placed in a preheated metal block and stirred at 80 °C for 3 h. After the reaction was complete as monitored by TLC, it was quenched with saturated NaCl solution (5 mL) at room temperature, and then extracted with DCM (10 mL × 3). The organic layers were combined, washed with brine, dried over Na<sub>2</sub>SO<sub>4</sub> filtered, and then concentrated in vacuum. The residue was purified by flash chromatography on silica gel to afford the desired product **4a** 48.5 mg (61%).

### b) Intermediate trapping experiment

Intermediate trap by HRMS

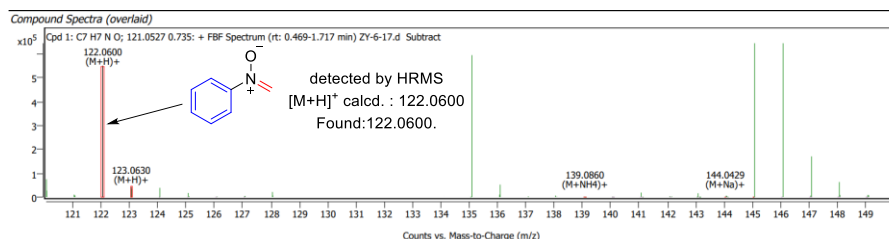

## 7. Gram-scale synthesis of 4a and derivatization of products 4 and 5

### a) Gram-scale synthesis of compound 4a

An oven-dried 100 mL three-necked flask equipped with a magnetic stir bar was charged with **1a** (888 mg, 3.2 mmol), **2a** (697.6 mg, 6.4 mmol), Polyformaldehyde (577 mg, 19.2 mmol), **N3** (413.5 mg, 3.2

mmol), MeOH (24 mL) and H<sub>2</sub>O (8 mL). The reaction mixture was stirred at 80 °C for 3 h, another 2.0 equivalents of **2a** was added, and react for another 3 h. The reaction was quenched with saturated NaHCO<sub>3</sub> solution (15 mL) at room temperature, and then extracted with DCM (30 mL × 3). The organic layers were combined, washed with brine, dried over Na<sub>2</sub>SO<sub>4</sub>, filtered, and then concentrated in vacuum. The residue was purified by flash chromatography on silica gel with petroleum ether/ethyl acetate 20/1 to 15/1 afford the desired product **4a** as a white solid (1.1669 g, 91%).

## b) Synthesis of products **6** and **7**

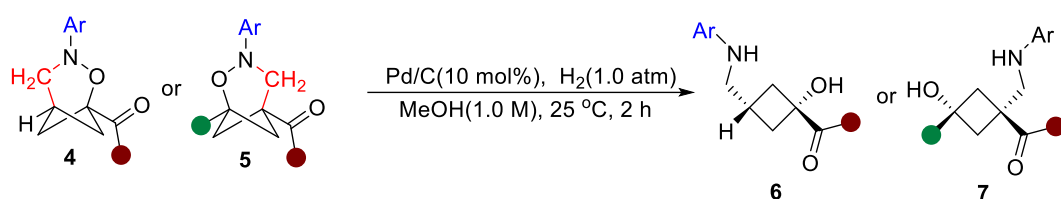

An oven-dried 10 mL Schlenk tube was charged with solvent of **4** or **5** (0.2 mmol) in MeOH (2.0 mL) was added under argon, then Pd/C (palladium on activated carbon, 5% Pd basis, 10 mol %) was added, and charged H<sub>2</sub> 3 times. The reaction mixture was stirred at H<sub>2</sub> atmosphere (1.0 atm) at 25 °C for 2 hours. After the reaction was complete as monitored by TLC, it was quenched with saturated NaHCO<sub>3</sub> solution (5 mL) at room temperature, and then extracted with DCM (10 mL × 3). The organic layers were combined, washed with brine, dried over Na<sub>2</sub>SO<sub>4</sub>, filtered, and then concentrated in vacuum. The residue was purified by flash chromatography on silica gel with petroleum ether/ethyl acetate 5/1 to afford the desired product **6** and **7**.

## 8. Characterization of products

*N,N*-dibenzyl-3-phenyl-2-oxa-3-azabicyclo[3.1.1]heptane-1-carboxamide (**4a**).

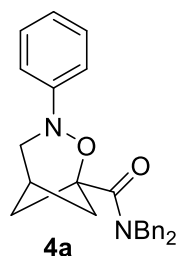

Eluent in chromatography: petroleum ether/ethyl acetate = 20:1, **4a** was isolated as a white solid ( 76.5 mg, 96 %); M.p.:76.6-78.6 °C;<sup>1</sup>H NMR (400 MHz, Chloroform-*d*) δ 7.41 – 7.13 (m, 12H), 6.96 – 6.80

(m, 3H), 4.74 (s, 2H), 4.56 (s, 2H), 3.75 (d,  $J = 3.2$  Hz, 2H), 2.78 – 2.68 (m, 1H), 2.63 – 2.53 (m, 2H), 2.43 – 2.31 (m, 2H);  $^{13}\text{C}$  NMR (100 MHz, Chloroform-*d*)  $\delta$  168.86, 149.95, 136.77, 136.72, 128.66, 128.63, 128.55, 127.89, 127.36, 127.26, 126.96, 121.20, 113.91, 86.54, 58.44, 49.54, 47.54, 38.07, 28.30. HRMS (ESI)  $m/z$ : calcd for  $\text{C}_{26}\text{H}_{27}\text{N}_2\text{O}_2$   $[\text{M}+\text{H}]^+$  399.2067, found: 399.2073.

***N,N*-diisopropyl-3-phenyl-2-oxa-3-azabicyclo[3.1.1]heptane-1-carboxamide (4b).**

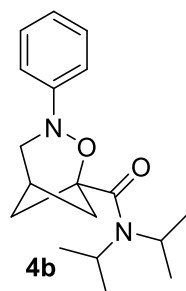

Eluent in chromatography: petroleum ether/ethyl acetate = 20:1, **4b** was isolated as a white solid (48.4 mg, 80 %); M.p.: 120.8–122.8 °C;  $^1\text{H}$  NMR (400 MHz, Chloroform-*d*)  $\delta$  7.28 (t,  $J = 7.2$  Hz, 2H), 7.03 (d,  $J = 8.0$  Hz, 2H), 6.93 (t,  $J = 7.2$  Hz, 1H), 4.57 – 4.39 (m, 1H), 3.74 (d,  $J = 3.2$  Hz, 2H), 3.47 – 3.28 (m, 1H), 2.77 – 2.60 (m, 1H), 2.53 – 2.36 (m, 2H), 2.35 – 2.19 (m, 2H), 1.43 (d,  $J = 6.8$  Hz, 6H), 1.19 (d,  $J = 6.8$  Hz, 6H).  $^{13}\text{C}$  NMR (100 MHz, Chloroform-*d*)  $\delta$  167.06, 150.29, 128.71, 120.98, 113.70, 87.28, 58.53, 48.16, 46.01, 37.58, 27.92, 20.83, 20.26. HRMS (ESI)  $m/z$ : calcd for  $\text{C}_{18}\text{H}_{27}\text{N}_2\text{O}_2$   $[\text{M}+\text{H}]^+$  303.2067, found: 303.2075.

***N*-methyl-*N*,3-diphenyl-2-oxa-3-azabicyclo[3.1.1]heptane-1-carboxamide (4c).**

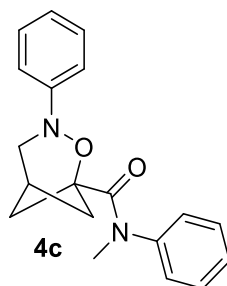

Eluent in chromatography: petroleum ether/ethyl acetate = 20:1, **4c** was isolated as a white solid (56.4 mg, 92 %); M.p.: 156.3–158.3 °C;  $^1\text{H}$  NMR (400 MHz, Chloroform-*d*)  $\delta$  7.59 – 7.09 (m, 7H), 7.06 – 6.69 (m, 3H), 3.78 – 3.48 (m, 2H), 3.33 (s, 3H), 2.54 – 2.38 (m, 1H), 2.37 – 2.06 (m, 2H), 1.98 – 1.55 (m, 2H).  $^{13}\text{C}$  NMR (100 MHz,  $\text{CDCl}_3$ )  $\delta$  168.13, 150.36, 142.86, 128.92, 128.47, 127.67, 120.74, 113.84, 86.17, 58.65, 38.68, 38.28, 27.75. HRMS (ESI)  $m/z$ : calcd for  $\text{C}_{19}\text{H}_{21}\text{N}_2\text{O}_2$   $[\text{M}+\text{H}]^+$  309.1598, found: 309.1604.

***N*-methoxy-*N*-methyl-3-phenyl-2-oxa-3-azabicyclo[3.1.1]heptane-1-carboxamide (4d).**



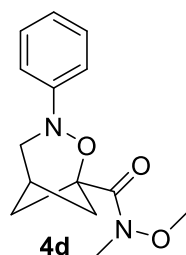

Eluent in chromatography: petroleum ether/ethyl acetate 20:1, **4d** was isolated as a yellow oil (40.9 mg, 78 %);  $^1\text{H}$  NMR (400 MHz, Chloroform-*d*)  $\delta$  7.28 (t,  $J = 8.0$  Hz, 2H), 7.07 – 7.01 (m, 2H), 6.92 (t,  $J = 7.4$  Hz, 1H), 3.87 – 3.67 (m, 5H), 3.23 (s, 3H), 2.80 – 2.55 (m, 1H), 2.51 – 2.24 (m, 4H).  $^{13}\text{C}$  NMR (100 MHz,  $\text{CDCl}_3$ )  $\delta$  168.80, 128.73, 120.89, 117.59, 113.75, 85.54, 61.99, 58.92, 37.32, 32.48, 28.39. HRMS (ESI)  $m/z$ : calcd for  $\text{C}_{14}\text{H}_{19}\text{N}_2\text{O}_3$   $[\text{M}+\text{H}]^+$  263.1390, found: 263.1385.

***N,N*-dibenzyl-3-(4-fluorophenyl)-2-oxa-3-azabicyclo[3.1.1]heptane-1-carboxamide (4e).**

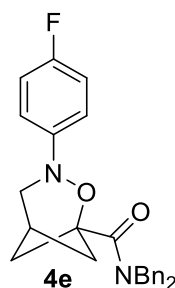

Eluent in chromatography: petroleum ether/ethyl acetate 20:1, **4e** was isolated as a yellow solid (60.8 mg, 73 %); M.p.: 122.8–124.8 °C;  $^1\text{H}$  NMR (400 MHz,  $\text{CDCl}_3$ )  $\delta$  7.43 – 7.27 (m, 6H), 7.24 – 7.11 (m, 4H), 6.90 – 6.83 (m, 2H), 6.83–6.74 (m, 2H), 4.72 (s, 2H), 4.56 (s, 2H), 3.69 (d,  $J = 4.0$  Hz, 2H), 2.78–2.66 (m, 1H), 2.64 – 2.50 (m, 2H), 2.45 – 2.31 (m, 2H).  $^{13}\text{C}$  NMR (100 MHz, Chloroform-*d*)  $\delta$  168.86, 158.01 (d,  $J = 240.3$  Hz), 146.27 (d,  $J = 2.2$  Hz), 136.76, 136.74, 128.73, 128.61, 127.98, 127.45, 127.36, 126.98, 115.99 (d,  $J = 7.7$  Hz), 115.17 (d,  $J = 22.3$  Hz), 86.67, 59.20, 49.51, 47.60, 38.08, 28.36.  $^{19}\text{F}$  NMR (376 MHz,  $\text{CDCl}_3$ )  $\delta$  -122.52. HRMS (ESI)  $m/z$ : calcd for  $\text{C}_{26}\text{H}_{26}\text{FN}_2\text{O}_2$   $[\text{M}+\text{H}]^+$  417.1973, found: 417.1977.

***N,N*-dibenzyl-3-(4-chlorophenyl)-2-oxa-3-azabicyclo[3.1.1]heptane-1-carboxamide (4f).**

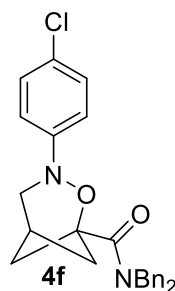

Eluent in chromatography: petroleum ether/ethyl acetate 20:1, **4f** was isolated as a yellow solid (73.6 mg, 87 %); M.p.:113.2-115.2 °C; <sup>1</sup>H NMR (400 MHz, Chloroform-*d*) δ 7.46 – 7.26 (m, 6H), 7.25 – 7.14 (m, 4H), 7.11 (d, *J* = 8.0 Hz, 2H), 6.74 (d, *J* = 8.0 Hz, 2H), 4.71 (s, 2H), 4.57 (s, 2H), 3.82 – 3.62 (m, 2H), 2.79 – 2.66 (m, 1H), 2.66 – 2.50 (m, 2H), 2.45 – 2.25 (m, 2H). <sup>13</sup>C NMR (100 MHz, Chloroform-*d*) δ 168.68, 148.48, 136.68, 136.67, 128.74, 128.59, 128.51, 127.93, 127.47, 127.36, 126.88, 126.11, 115.19, 86.72, 58.54, 49.48, 47.61, 38.02, 28.23. HRMS (ESI) *m/z*: calcd for C<sub>26</sub>H<sub>26</sub>ClN<sub>2</sub>O<sub>2</sub> [M+H]<sup>+</sup> 433.1677, found:433.1677.

***N,N*-dibenzyl-3-(*p*-tolyl)-2-oxa-3-azabicyclo[3.1.1]heptane-1-carboxamide (4g).**

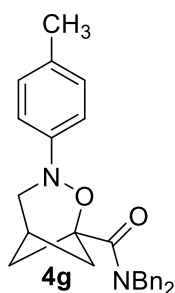

Eluent in chromatography: petroleum ether/ethyl acetate 20:1, **4g** was isolated as a yellow solid (49.1 mg, 61 %); M.p.:125.3-126.8 °C; <sup>1</sup>H NMR (400 MHz, Chloroform-*d*) δ 7.59 – 7.10 (m, 10H), 7.01 (d, *J* = 7.6 Hz, 2H), 6.80 (d, *J* = 7.6 Hz, 2H), 4.75 (s, 2H), 4.56 (s, 2H), 3.71 (d, *J* = 4.0 Hz, 2H), 2.77– 2.65 (m, 1H), 2.64 – 2.48 (m, 2H), 2.44 – 2.33 (m, 2H), 2.27 (s, 3H); <sup>13</sup>C NMR (100 MHz, Chloroform-*d*) δ 169.02, 147.77, 136.83, 136.76, 130.87, 129.17, 128.67, 128.57, 127.90, 127.38, 127.27, 127.03, 114.39, 86.47, 58.85, 49.56, 47.51, 38.11, 28.35, 20.50. HRMS (ESI) *m/z*: calcd for C<sub>27</sub>H<sub>29</sub>N<sub>2</sub>O<sub>2</sub> [M+H]<sup>+</sup> 413.2224, found: 413.2226.

***N,N*-dibenzyl-3-(4-cyanophenyl)-2-oxa-3-azabicyclo[3.1.1]heptane-1-carboxamide (4h).**

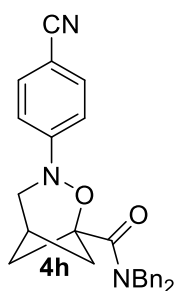

Eluent in chromatography: petroleum ether/ethyl acetate 20:1, **4h** was isolated as a yellow oil (30.5 mg, 36 %); <sup>1</sup>H NMR (400 MHz, Chloroform-*d*) δ 7.44 – 7.27 (m, 8H), 7.23 – 7.13 (m, 4H), 6.80 – 6.68 (m, 2H), 4.67 (s, 2H), 4.58 (s, 2H), 3.83 (d, *J* = 3.0 Hz, 2H), 2.83 – 2.71 (m, 1H), 2.70 – 2.56 (m, 2H), 2.34

– 2.23 (m, 2H).  $^{13}\text{C}$  NMR (100 MHz, Chloroform-*d*)  $\delta$  168.11, 152.18, 136.58, 136.55, 133.02, 128.87, 128.67, 128.01, 127.62, 127.52, 126.75, 119.61, 112.44, 102.49, 87.26, 57.09, 49.50, 47.85, 37.93, 28.04. HRMS (ESI) *m/z*: calcd for  $\text{C}_{27}\text{H}_{26}\text{N}_3\text{O}_2$   $[\text{M}+\text{H}]^+$  424.2020, found: 424.2025.

**methyl 4-(1-(dibenzylcarbamoyl)-2-oxa-3-azabicyclo[3.1.1]heptan-3-yl)benzoate (4i).**

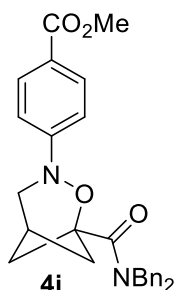

Eluent in chromatography: petroleum ether/ethyl acetate 20:1, **4i** was isolated as a yellow solid (42.0 mg, 46 %); M.p.:128.4-130.4 °C;  $^1\text{H}$  NMR (400 MHz, Chloroform-*d*)  $\delta$  7.88 – 7.81 (m, 2H), 7.43 – 7.27 (m, 6H), 7.25 – 7.13 (m, 4H), 6.87 – 6.70 (m, 2H), 4.70 (s, 2H), 4.57 (s, 2H), 3.86 (s, 3H), 3.83 (d,  $J = 4.0$  Hz, 2H), 2.79 – 2.69 (m, 1H), 2.68 – 2.54 (m, 2H), 2.36 – 2.25 (m, 2H).  $^{13}\text{C}$  NMR (100 MHz, Chloroform-*d*)  $\delta$  168.36, 166.87, 152.92, 136.57, 136.53, 130.67, 128.78, 128.62, 127.90, 127.56, 127.42, 126.82, 121.64, 111.91, 86.96, 57.34, 51.71, 49.52, 47.66, 37.95, 28.09. HRMS (ESI) *m/z*: calcd for  $\text{C}_{28}\text{H}_{29}\text{N}_2\text{O}_4$   $[\text{M}+\text{H}]^+$  457.2122, found: 457.2126.

***N,N*-dibenzyl-3-(3-fluorophenyl)-2-oxa-3-azabicyclo[3.1.1]heptane-1-carboxamide (4j).**

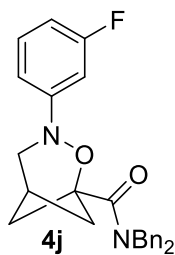

Eluent in chromatography: petroleum ether/ethyl acetate 20:1, **4j** was isolated as a yellow solid (64.1 mg, 77 %); M.p.:104.0-106.0 °C;  $^1\text{H}$  NMR (400 MHz, Chloroform-*d*)  $\delta$  7.43 – 7.26 (m, 6H), 7.25 – 7.16 (m, 4H), 7.18 – 7.07 (m, 1H), 6.67 – 6.53 (m, 3H), 4.72 (s, 2H), 4.58 (s, 2H), 3.75 (d,  $J = 3.0$  Hz, 2H), 2.77 – 2.68 (m, 1H), 2.66 – 2.53 (m, 2H), 2.42 – 2.30 (m, 2H).  $^{13}\text{C}$  NMR (100 MHz, Chloroform-*d*)  $\delta$  168.58, 163.24 (d,  $J = 243.9$  Hz), 151.52 (d,  $J = 10.1$  Hz), 136.62, 136.59, 129.80 (d,  $J = 9.6$  Hz), 128.73, 128.61, 127.86, 127.50, 127.36, 126.86, 108.96 (d,  $J = 2.6$  Hz), 107.50 (d,  $J = 21.5$  Hz), 101.22 (d,  $J = 26.6$  Hz),

86.75, 58.26, 49.50, 47.59, 38.02, 28.17;  $^{19}\text{F}$  NMR (376 MHz,  $\text{CDCl}_3$ )  $\delta$  -112.14. HRMS (ESI)  $m/z$ : calcd for  $\text{C}_{26}\text{H}_{26}\text{FN}_2\text{O}_2$   $[\text{M}+\text{H}]^+$  417.1973, found: 417.1978.

***N,N*-dibenzyl-3-(3-chlorophenyl)-2-oxa-3-azabicyclo[3.1.1]heptane-1-carboxamide (4k).**

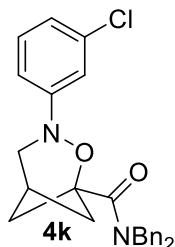

Eluent in chromatography: petroleum ether/ethyl acetate 20:1, **4k** was isolated as a yellow oil (62.1 mg, 71 %);  $^1\text{H}$  NMR (400 MHz,  $\text{CDCl}_3$ )  $\delta$  7.41 – 7.28 (m, 6H), 7.23 – 7.16 (m, 4H), 7.13 – 7.05 (m, 1H), 7.01 – 6.92 (m, 1H), 6.86 (d,  $J$  = 8.0 Hz, 1H), 6.81 – 6.63 (m, 1H), 4.70 (s, 2H), 4.57 (s, 2H), 3.74 (d,  $J$  = 4.0 Hz, 2H), 2.81 – 2.67 (m, 1H), 2.65 – 2.54 (m, 2H), 2.39 – 2.28 (m, 2H).  $^{13}\text{C}$  NMR (400 MHz,  $\text{CDCl}_3$ )  $\delta$  168.55, 150.99, 136.64, 136.58, 134.61, 129.66, 128.78, 128.63, 127.85, 127.52, 127.35, 126.92, 120.92, 113.90, 111.70, 86.78, 58.34, 49.54, 47.56, 38.05, 28.19. HRMS (ESI)  $m/z$ : calcd for  $\text{C}_{26}\text{H}_{26}\text{ClN}_2\text{O}_2$   $[\text{M}+\text{H}]^+$  433.1677, found: 433.1678.

***N,N*-dibenzyl-3-(*m*-tolyl)-2-oxa-3-azabicyclo[3.1.1]heptane-1-carboxamide (4l).**

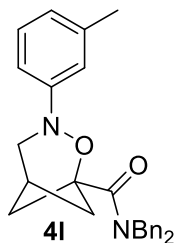

Eluent in chromatography: petroleum ether/ethyl acetate 20:1, **4l** was isolated as a white solid (73.4 mg, 89 %); M.p.: 103.6-105.6 °C;  $^1\text{H}$  NMR (400 MHz,  $\text{CDCl}_3$ )  $\delta$  7.41 – 7.27 (m, 6H), 7.25 – 7.17 (m, 4H), 7.10 (t,  $J$  = 8.0 Hz, 1H), 6.80 – 6.76 (m, 1H), 6.74 (d,  $J$  = 8.0 Hz, 1H), 6.71 – 6.67 (m, 1H), 4.75 (s, 2H), 4.57 (s, 2H), 3.75 (d,  $J$  = 4.0 Hz, 2H), 2.78 – 2.67 (m, 1H), 2.63 – 2.53 (m, 2H), 2.43 – 2.32 (m, 2H), 2.24 (s, 3H).  $^{13}\text{C}$  NMR (100 MHz,  $\text{CDCl}_3$ )  $\delta$  168.93, 149.98, 138.50, 136.79, 136.74, 128.68, 128.56, 128.51, 127.87, 127.41, 127.28, 127.06, 122.12, 114.76, 110.92, 86.51, 58.50, 49.56, 47.44, 38.08, 28.32, 21.60. HRMS (ESI)  $m/z$ : calcd for  $\text{C}_{27}\text{H}_{29}\text{N}_2\text{O}_2$   $[\text{M}+\text{H}]^+$  413.2224, found: 413.2227.

***N,N*-dibenzyl-3-(*o*-tolyl)-2-oxa-3-azabicyclo[3.1.1]heptane-1-carboxamide (4m).**

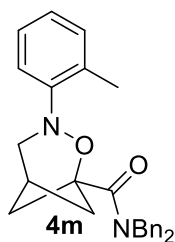

Eluent in chromatography: petroleum ether/ethyl acetate 20:1, **4m** was isolated as a yellow solid (31.2 mg, 45 %); M.p.:92.8-94.8 °C; <sup>1</sup>H NMR (400 MHz, Chloroform-*d*) δ 7.39 (d, *J* = 8.0 Hz, 1H), 7.32 – 7.17 (m, 6H), 7.16 – 7.05 (m, 6H), 7.05 – 6.98 (m, 1H), 4.63 (s, 2H), 4.45 (s, 2H), 3.44 (d, *J* = 3.2 Hz, 2H), 2.67 – 2.58 (m, 1H), 2.56 – 2.45 (m, 4H), 2.27 – 2.20 (m, 3H). <sup>13</sup>C NMR (100 MHz, Chloroform-*d*) δ 169.17, 148.51, 136.88, 136.85, 131.13, 130.41, 128.49, 128.11, 127.28, 127.20, 126.53, 125.23, 120.47, 86.57, 60.60, 49.53, 47.47, 38.34, 28.92, 17.90. HRMS (ESI) *m/z*: calcd for C<sub>27</sub>H<sub>29</sub>N<sub>2</sub>O<sub>2</sub> [M+H]<sup>+</sup> 413.2224, found: 413.2229.

***N,N*-dibenzyl-3-(3-bromo-4-methylphenyl)-2-oxa-3-azabicyclo[3.1.1]heptane-1-carboxamide (4n).**

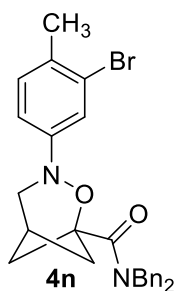

Eluent in chromatography: petroleum ether/ethyl acetate 20:1, **4n** was isolated as a yellow oil (55.3 mg, 57 %); <sup>1</sup>H NMR (400 MHz, Chloroform-*d*) δ 7.42 – 7.27 (m, 6H), 7.24 – 7.16 (m, 5H), 7.02 (d, *J* = 8.4 Hz, 1H), 6.75 – 6.65 (m, 1H), 4.70 (s, 2H), 4.56 (s, 2H), 3.70 (d, *J* = 3.0 Hz, 2H), 2.75 – 2.67 (m, 1H), 2.62 – 2.52 (m, 2H), 2.39 – 2.32 (m, 2H), 2.30 (s, 3H). <sup>13</sup>C NMR (100 MHz, Chloroform-*d*) δ 168.67, 149.04, 136.64, 136.62, 130.49, 130.24, 128.77, 128.63, 127.81, 127.49, 127.31, 126.99, 124.92, 117.84, 113.14, 86.65, 58.75, 49.54, 47.46, 38.07, 28.21, 21.90. HRMS (ESI) *m/z*: calcd for C<sub>27</sub>H<sub>28</sub>BrN<sub>2</sub>O<sub>2</sub> [M+H]<sup>+</sup> 491.1329, found: 491.1327.

***N,N*-dibenzyl-3-cyclohexyl-2-oxa-3-azabicyclo[3.1.1]heptane-1-carboxamide (4o).**

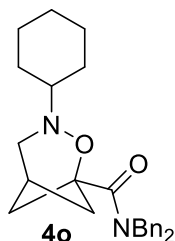

Eluent in chromatography: petroleum ether/ethyl acetate 20:1, **4o** was isolated as a colorless oil (66.3 mg, 82 %);  $^1\text{H}$  NMR (600 MHz, Chloroform-*d*)  $\delta$  7.37 – 7.22 (m, 6H), 7.18 – 7.12 (m, 4H), 4.68 (s, 2H), 4.49 (s, 2H), 3.22 – 3.03 (m, 2H), 2.60 – 2.50 (m, 2H), 2.45 – 2.13 (m, 4H), 1.91 – 1.81 (m, 2H), 1.70 – 1.62 (m, 2H), 1.59 – 1.51 (m, 1H), 1.24 – 1.09 (m, 5H).  $^{13}\text{C}$  NMR (150 MHz,  $\text{CDCl}_3$ )  $\delta$  169.85, 137.23, 136.86, 128.46, 128.41, 127.79, 127.15, 127.06, 127.03, 85.35, 64.85, 58.40, 49.50, 47.22, 38.06, 29.08, 28.50, 25.95, 24.45. HRMS (ESI)  $m/z$ : calcd for  $\text{C}_{26}\text{H}_{33}\text{N}_2\text{O}_2$   $[\text{M}+\text{H}]^+$  405.2537, found: 405.2557.

***N,N*-dibenzyl-3-cyclopentyl-2-oxa-3-azabicyclo[3.1.1]heptane-1-carboxamide (4p).**

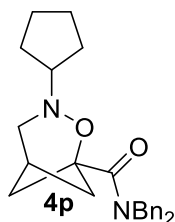

Eluent in chromatography: petroleum ether/ethyl acetate 20:1, **4p** was isolated as a yellow solid (59.4 mg, 76 %); M.p.:85.2-86.6 °C;  $^1\text{H}$  NMR (400 MHz, Chloroform-*d*)  $\delta$  7.39 – 7.21 (m, 6H), 7.20 – 7.07 (m, 4H), 4.68 (s, 2H), 4.48 (s, 2H), 3.28 – 2.91 (m, 3H), 2.58–2.07 (br, 5H), 1.77 – 1.64 (m, 2H), 1.64 – 1.53 (m, 2H), 1.53 – 1.40 (m, 4H).  $^{13}\text{C}$  NMR (100 MHz, Chloroform-*d*)  $\delta$  169.78, 137.18, 136.85, 128.52, 128.45, 127.76, 127.23, 127.18, 127.06, 85.49, 68.30, 60.66, 49.55, 47.14, 37.89, 29.87, 28.53, 24.37. HRMS (ESI)  $m/z$ : calcd for  $\text{C}_{25}\text{H}_{31}\text{N}_2\text{O}_2$   $[\text{M}+\text{H}]^+$  391.2380, found: 391.2380.

**Methyl 3,5-diphenyl-2-oxa-3-azabicyclo[3.1.1]heptane-1-carboxylate (5a).**

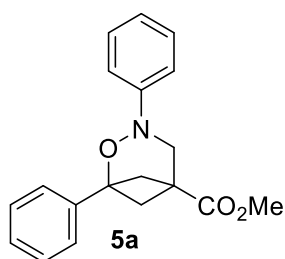

Eluent in chromatography: petroleum ether/ethyl acetate = 100:1, **5a** was isolated as a colorless oil (35.9 mg, 58%);  $^1\text{H}$  NMR (400 MHz,  $\text{CDCl}_3$ )  $\delta$  7.48 – 7.33 (m, 5H), 7.33 – 7.27 (m, 2H), 7.14 – 7.07 (m, 2H), 6.98 – 6.90 (m, 1H), 4.03 (s, 2H), 3.79 (s, 3H), 2.77 – 2.66 (m, 4H).  $^{13}\text{C}$  NMR (100 MHz,  $\text{CDCl}_3$ )  $\delta$  172.79, 150.07, 140.07, 128.85, 128.42, 128.26, 125.62, 120.96, 113.83, 83.38, 57.50, 52.27, 42.11, 41.85. HRMS (ESI)  $m/z$ : calcd for  $\text{C}_{19}\text{H}_{20}\text{NO}_3$   $[\text{M}+\text{H}]^+$  310.1438, found: 310.1440.

**Methyl 3-phenyl-5-(p-tolyl)-2-oxa-3-azabicyclo[3.1.1]heptane-1-carboxylate (5b).**

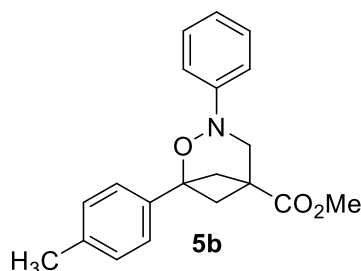

Eluent in chromatography: petroleum ether/ethyl acetate = 100:1, **5b** was isolated as a yellow oil (41.4 mg, 64%);  $^1\text{H}$  NMR (400 MHz, Chloroform-*d*)  $\delta$  7.37 – 7.27 (m, 4H), 7.25 – 7.20 (m, 2H), 7.14 – 7.07 (m, 2H), 6.98 – 6.89 (m, 1H), 4.03 (s, 2H), 3.79 (s, 3H), 2.79 – 2.62 (m, 4H), 2.39 (s, 3H).  $^{13}\text{C}$  NMR (100 MHz, Chloroform-*d*)  $\delta$  172.83, 150.12, 138.08, 137.25, 129.07, 128.83, 125.56, 120.85, 113.78, 83.32, 57.45, 52.24, 42.08, 41.87, 21.21. HRMS (ESI)  $m/z$ : calcd for  $\text{C}_{20}\text{H}_{22}\text{NO}_3$   $[\text{M}+\text{H}]^+$  324.1594, found: 324.1602.

**Methyl 5-(4-fluorophenyl)-3-phenyl-2-oxa-3-azabicyclo[3.1.1]heptane-1-carboxylate (5c).**

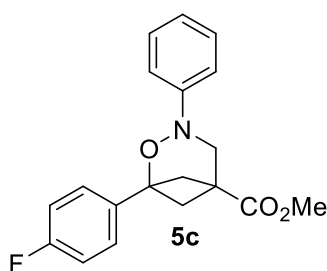

Eluent in chromatography: petroleum ether/ethyl acetate = 100:1, **5c** was isolated as a yellow oil (38.0 mg, 58%);  $^1\text{H}$  NMR (400 MHz, Chloroform-*d*)  $\delta$  7.46 – 7.38 (m, 2H), 7.34 – 7.27 (m, 2H), 7.14 – 7.05 (m, 4H), 6.99 – 6.91 (m, 1H), 4.02 (s, 2H), 3.79 (s, 3H), 2.74 – 2.65 (m, 4H).  $^{13}\text{C}$  NMR (100 MHz, Chloroform-*d*)  $\delta$  172.64, 162.60 (d,  $J=247.1$  Hz), 149.93, 136.08, 128.87, 127.51 (d,  $J=8.3$  Hz), 121.11, 115.32 (d,  $J=21.6$  Hz), 113.87, 82.87, 57.46, 52.30, 42.12, 41.77.  $^{19}\text{F}$  NMR (376 MHz, Chloroform-*d*)  $\delta$  -113.56. HRMS (ESI)  $m/z$ : calcd for  $\text{C}_{19}\text{H}_{19}\text{FNO}_3$   $[\text{M}+\text{H}]^+$  328.1343, found: 328.1345.

**Methyl 3-phenyl-1-(m-tolyl)-2-oxa-3-azabicyclo[3.1.1]heptane-5-carboxylate (5d)**

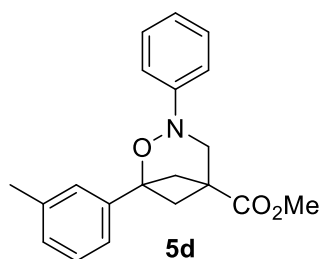

Eluent in chromatography: petroleum ether/ethyl acetate = 100:1, **5d** was isolated as a colorless oil (26.5 mg, 41%);  $^1\text{H}$  NMR (400 MHz, Chloroform-*d*)  $\delta$  7.36 – 7.24 (m, 5H), 7.18 (d,  $J$  = 4.0 Hz, 1H), 7.15 – 7.08 (m, 2H), 6.97 – 6.92 (m, 1H), 4.04 (s, 2H), 3.79 (s, 3H), 2.80 – 2.65 (m, 4H), 2.41 (s, 3H).  $^{13}\text{C}$  NMR (100 MHz,  $\text{CDCl}_3$ )  $\delta$  172.81, 150.10, 140.00, 138.06, 129.00, 128.82, 128.32, 126.29, 122.66, 120.91, 113.84, 83.38, 57.53, 52.24, 42.06, 41.84, 21.47. HRMS (ESI)  $m/z$ : calcd for  $\text{C}_{20}\text{H}_{22}\text{NO}_3$   $[\text{M}+\text{H}]^+$  324.1594, found:324.1602.

**Methyl 3-phenyl-5-(4-(trifluoromethyl)phenyl)-2-oxa-3-azabicyclo[3.1.1]heptane-1-carboxylate (5e).**

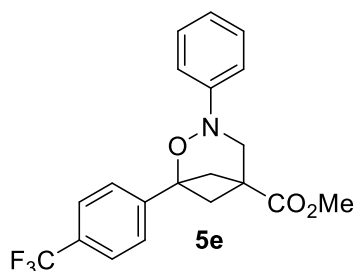

Eluent in chromatography: petroleum ether/ethyl acetate = 100:1, **5e** was isolated as a colorless oil (30.5 mg, 39%);  $^1\text{H}$  NMR (400 MHz,  $\text{CDCl}_3$ )  $\delta$  7.68 (d,  $J$  = 8.0 Hz, 2H), 7.58 (d,  $J$  = 8.0 Hz, 2H), 7.36 – 7.28 (m, 2H), 7.10 (d,  $J$  = 8.0 Hz, 2H), 7.02 -6.91 (m, 1H), 4.04 (s, 2H), 3.80 (s, 3H), 2.85 – 2.62 (m, 4H).  $^{13}\text{C}$  NMR (100 MHz,  $\text{CDCl}_3$ )  $\delta$  172.48, 149.79, 143.75, 130.40 (q,  $J$  = 32.6 Hz), 128.91, 126.03, 125.45 (q,  $J$  = 3.8 Hz), 124.00 (q,  $J$  = 270 Hz), 121.36, 113.98, 82.81, 57.62, 52.37, 42.28, 41.82.  $^{19}\text{F}$  NMR (376 MHz,  $\text{CDCl}_3$ )  $\delta$  -62.57. HRMS (ESI)  $m/z$ : calcd for  $\text{C}_{20}\text{H}_{19}\text{F}_3\text{NO}_3$   $[\text{M}+\text{H}]^+$  378.1312, found: 378.1317.

**Methyl 5-(3-fluorophenyl)-3-phenyl-2-oxa-3-azabicyclo[3.1.1]heptane-1-carboxylate (5f).**

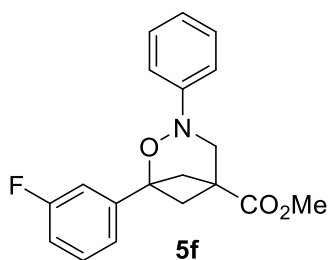



Eluent in chromatography: petroleum ether/ethyl acetate = 100:1, **5f** was isolated as a colorless oil (24.9 mg, 38%);  $^1\text{H NMR}$  (400 MHz, Chloroform-*d*)  $\delta$  7.42 – 7.35 (m, 1H), 7.34 – 7.28 (m, 2H), 7.23 (d,  $J$  = 8.1 Hz, 1H), 7.20 – 7.14 (m, 1H), 7.11 (d,  $J$  = 8.0 Hz, 2H), 7.08 – 7.00 (m, 1H), 6.99 – 6.93 (m, 1H), 4.02 (s, 2H), 3.80 (s, 3H), 2.78 – 2.64 (m, 4H).  $^{13}\text{C NMR}$  (100 MHz, Chloroform-*d*)  $\delta$  172.56, 162.83 (d,  $J$  = 246.3 Hz), 149.85, 142.56 (d,  $J$  = 7.1 Hz), 130.04 (d,  $J$  = 8.2 Hz), 128.88, 121.23, 121.19 (d,  $J$  = 3.0 Hz), 115.16 (d,  $J$  = 21.1 Hz), 113.94, 112.82 (d,  $J$  = 22.1 Hz), 82.80 (d,  $J$  = 1.8 Hz), 57.56, 52.32, 42.32, 41.75.  $^{19}\text{F NMR}$  (376 MHz, Chloroform-*d*)  $\delta$  -112.59. HRMS (ESI)  $m/z$ : calcd for  $\text{C}_{19}\text{H}_{19}\text{FNO}_3$   $[\text{M}+\text{H}]^+$  328.1343, found: 328.1351.

**Methyl 5-(3-methoxyphenyl)-3-phenyl-2-oxa-3-azabicyclo[3.1.1]heptane-1-carboxylate (5g).**

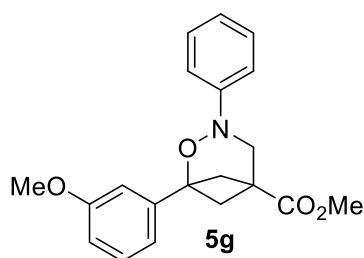

Eluent in chromatography: petroleum ether/ethyl acetate = 100:1, **5g** was isolated as a yellow oil (43.4 mg, 64%);  $^1\text{H NMR}$  (400 MHz, Chloroform-*d*)  $\delta$  7.38 – 7.27 (m, 3H), 7.11 (d,  $J$  = 8.0 Hz, 2H), 7.07 – 6.98 (m, 2H), 6.97 – 6.87 (m, 2H), 4.03 (s, 2H), 3.85 (s, 3H), 3.79 (s, 3H), 2.78 – 2.64 (m, 4H).  $^{13}\text{C NMR}$  (100 MHz,  $\text{CDCl}_3$ )  $\delta$  172.72, 159.67, 150.07, 141.66, 129.50, 128.84, 120.97, 117.91, 113.85, 113.62, 111.48, 83.29, 57.53, 55.29, 52.24, 42.18, 41.82. HRMS (ESI)  $m/z$ : calcd for  $\text{C}_{20}\text{H}_{22}\text{NO}_4$   $[\text{M}+\text{H}]^+$  340.1543, found: 340.1549.

***tert*-Butyl 3,5-diphenyl-2-oxa-3-azabicyclo[3.1.1]heptane-1-carboxylate (5h).**

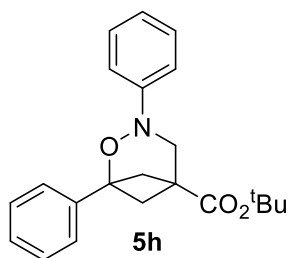

Eluent in chromatography: petroleum ether/ethyl acetate = 100:1, **5h** was isolated as a yellow solid (47.1 mg, 67%); M.p.:85.3-87.3 °C;  $^1\text{H NMR}$  (400 MHz, Chloroform-*d*)  $\delta$  7.51 – 7.27 (m, 7H), 7.17 – 7.06 (m, 2H), 6.99 – 6.89 (m, 1H), 4.01 (s, 2H), 2.68 (s, 4H), 1.53 (s, 9H).  $^{13}\text{C NMR}$  (100 MHz, Chloroform-*d*)  $\delta$  171.63, 150.25, 140.27, 128.80, 128.38, 128.19, 125.68, 120.79, 113.79, 83.19, 81.35, 57.67, 42.71, 41.88, 28.00. HRMS (ESI)  $m/z$ : calcd for  $\text{C}_{22}\text{H}_{26}\text{NO}_3$   $[\text{M}+\text{H}]^+$  352.1907, found: 352.1897.

**(3,5-Diphenyl-2-oxa-3-azabicyclo[3.1.1]heptan-1-yl)(morpholino)methanone (5i).**

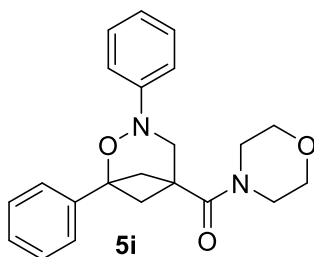

Eluent in chromatography: petroleum ether/ethyl acetate = 100:1, **5i** was isolated as a yellow solid 44.5 mg, 61 %; M.p.: 176.3-178.3 °C; <sup>1</sup>H NMR (400 MHz, Chloroform-*d*) δ 7.47 – 7.25 (m, 7H), 7.12 – 7.04 (m, 2H), 6.95 (t, *J* = 7.3 Hz, 1H), 3.92 (s, 2H), 3.82 – 3.47 (m, 8H), 2.91 – 2.77 (m, 2H), 2.72 – 2.58 (m, 2H). <sup>13</sup>C NMR (100 MHz, Chloroform-*d*) δ 171.43, 149.89, 139.85, 128.91, 128.42, 128.24, 125.58, 121.32, 114.05, 82.42, 66.75, 58.68, 46.27, 43.67, 42.48. HRMS (ESI) *m/z*: calcd for C<sub>22</sub>H<sub>25</sub>N<sub>2</sub>O<sub>3</sub> [M+H]<sup>+</sup> 365.1860, found: 365.1854.

**(*E*)-3,7-Dimethylocta-2,6-dien-1-yl 3,5-diphenyl-2-oxa-3-azabicyclo[3.1.1]heptane-1-carboxylate (5j).**

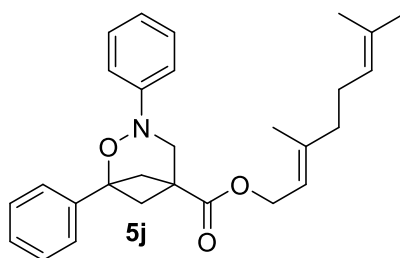

Eluent in chromatography: petroleum ether/ethyl acetate = 100:1, **5j** was isolated as a colorless oil (40.1 mg, 47 %); <sup>1</sup>H NMR (400 MHz, Chloroform-*d*) δ 7.48 – 7.40 (m, 4H), 7.39 – 7.34 (m, 1H), 7.33 – 7.27 (m, 2H), 7.15 – 7.07 (m, 2H), 6.98 – 6.89 (m, 1H), 5.44 – 5.32 (m, 1H), 5.16 – 5.06 (m, 1H), 4.71 (d, *J* = 7.1 Hz, 2H), 4.04 (s, 2H), 2.80 – 2.64 (m, 4H), 2.21 – 2.04 (m, 4H), 1.75 (s, 3H), 1.70 (s, 3H), 1.62 (s, 3H). <sup>13</sup>C NMR (100 MHz, Chloroform-*d*) δ 172.33, 150.15, 142.67, 140.17, 131.85, 128.82, 128.40, 128.24, 125.67, 123.62, 120.90, 117.97, 113.85, 83.37, 62.09, 57.57, 42.04, 42.00, 39.49, 26.22, 25.68, 17.70, 16.53. HRMS (ESI) *m/z*: calcd for C<sub>28</sub>H<sub>34</sub>NO<sub>3</sub> [M+H]<sup>+</sup> 432.2533, found: 432.2537.

***N,N*-dibenzyl-1-hydroxy-3-((phenylamino)methyl)cyclobutane-1-carboxamide(6a).**

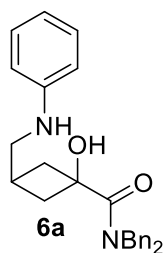

Eluent in chromatography: petroleum ether/ethyl acetate = 3:1, **6a** was isolated as a white solid (56.9 mg, 71 %); M.p.:156.3-158.3 °C; <sup>1</sup>H NMR (400 MHz, Chloroform-*d*) δ 7.51 – 7.00 (m, 12H), 6.78 – 6.68 (m, 1H), 6.67 – 6.53 (m, 2H), 4.58 (s, 2H), 4.49 (s, 2H), 3.45 (br, 1H), 3.25 (d, *J* = 6.8 Hz, 2H), 3.07 – 2.97 (m, 2H), 2.43 – 2.29 (m, 1H), 2.03 – 1.91 (m, 2H). <sup>13</sup>C NMR (100 MHz, CDCl<sub>3</sub>) δ 173.19, 148.22, 136.97, 136.62, 129.21, 128.63, 127.99, 127.48, 127.33, 117.53, 112.91, 73.92, 50.01, 49.55, 47.38, 38.50, 25.91. HRMS (ESI) *m/z*: calcd for C<sub>26</sub>H<sub>29</sub>N<sub>2</sub>O<sub>2</sub> [M+H]<sup>+</sup> 401.2224, found: 401.2219.

**1-Hydroxy-*N*-methyl-*N*-phenyl-3-((phenylamino)methyl)cyclobutane-1-carboxamide (6b).**

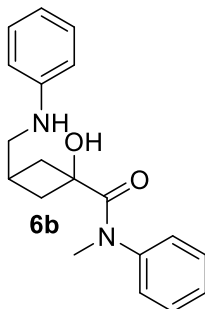

Eluent in chromatography: petroleum ether/ethyl acetate = 3:1, **6b** was isolated as a white solid (49.7 mg, 80 %); M.p.:113.6-115.6 °C; <sup>1</sup>H NMR (400 MHz, Chloroform-*d*) δ 7.46 – 7.36 (m, 2H), 7.35 – 7.25 (m, 3H), 7.21 – 7.07 (m, 2H), 6.73 – 6.63 (m, 1H), 6.56 (d, *J* = 7.2 Hz, 2H), 3.46 (br, 1H), 3.32 (s, 3H), 3.17 (d, *J* = 7.2 Hz, 2H), 2.83 – 2.63 (m, 2H), 2.31 – 2.11 (m, 1H), 1.79 – 1.55 (m, 2H). <sup>13</sup>C NMR (100 MHz, CDCl<sub>3</sub>) δ 173.38, 148.28, 143.52, 129.30, 129.13, 127.62, 127.26, 117.20, 112.71, 74.82, 49.27, 39.40, 38.12, 25.93. HRMS (ESI) *m/z*: calcd for C<sub>19</sub>H<sub>23</sub>N<sub>2</sub>O<sub>2</sub> [M+H]<sup>+</sup> 311.1754, found:311.1764.

**Methyl 3-hydroxy-3-phenyl-1-((phenylamino)methyl)cyclobutane-1-carboxylate (7a).**

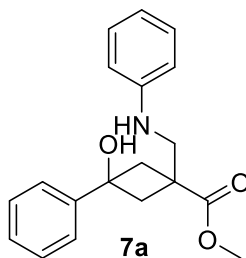

Eluent in chromatography: petroleum ether/ethyl acetate = 10:1, **7a** was isolated as a colorless oil (43.0 mg, 69 %);  $^1\text{H NMR}$  (400 MHz, Chloroform-*d*)  $\delta$  7.46 (d,  $J = 8.0$  Hz, 2H), 7.42 – 7.34 (m, 2H), 7.33 – 7.24 (m, 1H), 7.23 – 7.16 (m, 2H), 6.80 – 6.69 (m, 3H), 3.77 (s, 2H), 3.68 (s, 3H), 3.14 – 3.04 (m, 2H), 2.58 – 2.45 (m, 2H).  $^{13}\text{C NMR}$  (100 MHz,  $\text{CDCl}_3$ )  $\delta$  176.28, 148.31, 145.97, 129.27, 128.54, 127.52, 124.73, 117.79, 113.16, 73.13, 52.26, 50.18, 42.90, 41.12. HRMS (ESI)  $m/z$ : calcd for  $\text{C}_{19}\text{H}_{22}\text{NO}_3$   $[\text{M}+\text{H}]^+$  312.1594, found:312.1605.

**Methyl 3-(4-fluorophenyl)-3-hydroxy-1-((phenylamino)methyl)cyclobutane-1-carboxylate (7b).**

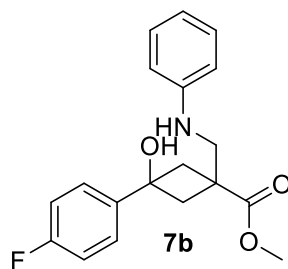

Eluent in chromatography: petroleum ether/ethyl acetate = 10:1, **7b** was isolated as a white solid (46.8 mg, 71 %); M.p.:78.7-79.8 °C;  $^1\text{H NMR}$  (400 MHz, Chloroform-*d*)  $\delta$  7.47 – 7.39 (m, 2H), 7.24 – 7.16 (m, 2H), 7.09 – 7.01 (m, 2H), 6.79 – 6.68 (m, 3H), 3.74 (s, 2H), 3.68 (s, 3H), 3.09 – 2.99 (m, 2H), 2.56 – 2.45 (m, 2H).  $^{13}\text{C NMR}$  (100 MHz, Chloroform-*d*)  $\delta$  176.19, 162.03 (d,  $J = 246.2$  Hz), 148.25, 141.85 (d,  $J = 3.2$  Hz), 129.28, 126.64 (d,  $J = 8.2$  Hz), 117.93, 115.24 (d,  $J = 21.3$  Hz), 113.21, 72.62, 52.31, 50.13, 43.11, 41.00.  $^{19}\text{F NMR}$  (376 MHz,  $\text{CDCl}_3$ )  $\delta$  -115.01. HRMS (ESI)  $m/z$ : calcd for  $\text{C}_{19}\text{H}_{21}\text{FNO}_3$   $[\text{M}+\text{H}]^+$  330.1500, found:330.1494.

## 9. DFT computations

**Computational details:** All density functional theory (DFT) calculations were carried out using Gaussian 09 package.<sup>[3]</sup> Geometry optimizations and vibrational frequencies were calculated at the B3LYP<sup>[4]</sup> level of theory with Grimme D3 correction<sup>[5]</sup>. A basis set of 6-31G(d,p)<sup>[6]</sup> is employed for all atoms in the gas phase. Frequencies calculations were used to determine the structures to be minima (no imaginary frequency) or transition states (only one imaginary frequency) and to obtain the thermal correction to free energies. Furthermore, solvation single-point energy calculations were performed at the  $w\beta 97\text{xd}/6\text{-}311++\text{G}(\text{d},\text{p})$ <sup>[7]</sup>-SMD level of theory in methonal solvent with SMD<sup>[8]</sup> contiummn solvation model to obtain more accurate energies. In order to compensate for the overestimation of the entropic, a

correction factor which consists on half (0.5) of the entropy correction for  $\Delta G$  values at 298 K was applied.<sup>[9]</sup> The calculated optimized structures are visualized using CYLview.<sup>[10]</sup>

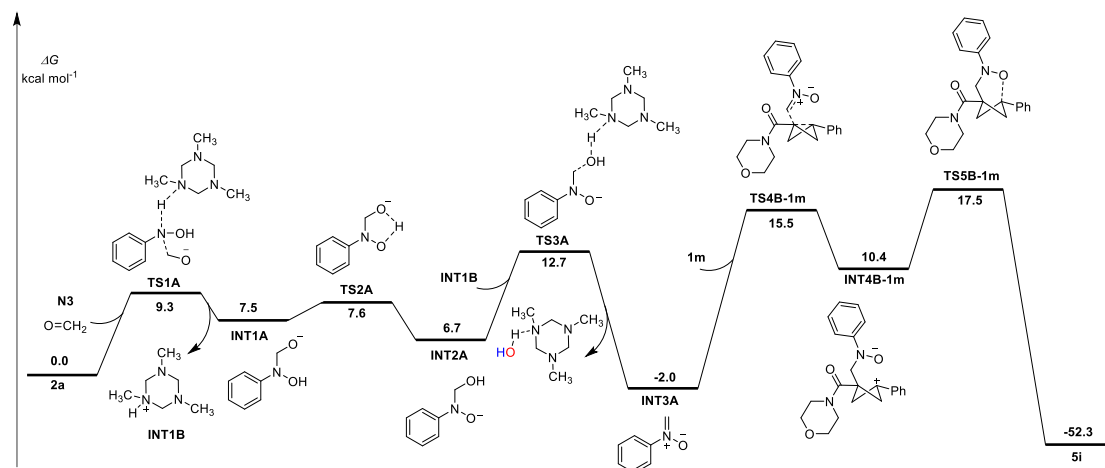

**Fig. S1.** The calculated energy profile for the generation of **5i**.

**Table S2.** The calculated energies of stationary points (in Hartree/Particle).

| Structure                | $E_{\text{ele}}$ | $H_{\text{corr}}$ | $G_{\text{corr}}$ | $H_{\text{sol}}$ | 0.5TS    | $G_{\text{sol}}$ |
|--------------------------|------------------|-------------------|-------------------|------------------|----------|------------------|
| <b>2a</b>                | -362.758129      | 0.129406          | 0.090603          | -362.628723      | 0.019402 | -362.648124      |
| <b>N3</b>                | -401.893915      | 0.230507          | 0.186950          | -401.663408      | 0.021779 | -401.685186      |
| <b>CH<sub>2</sub>O</b>   | -114.502574      | 0.030484          | 0.005009          | -114.472090      | 0.012738 | -114.484827      |
| <b>TS1A</b>              | -879.165434      | 0.395554          | 0.328768          | -878.769880      | 0.033393 | -878.803273      |
| <b>INT1A</b>             | -476.790718      | 0.147768          | 0.103960          | -476.642950      | 0.021904 | -476.664854      |
| <b>INT1B</b>             | -402.364775      | 0.245814          | 0.201210          | -402.118961      | 0.022302 | -402.141263      |
| <b>TS2A</b>              | -476.788137      | 0.144821          | 0.101775          | -476.643316      | 0.021523 | -476.664839      |
| <b>INT2A</b>             | -476.792597      | 0.148627          | 0.104042          | -476.643970      | 0.022293 | -476.666262      |
| <b>TS3A</b>              | -879.158360      | 0.394195          | 0.326879          | -878.764165      | 0.033658 | -878.797823      |
| <b>INT3A</b>             | -400.829321      | 0.134655          | 0.094713          | -400.694666      | 0.019971 | -400.714637      |
| <b>N3-H<sub>2</sub>O</b> | -478.349704      | 0.258738          | 0.207738          | -478.090966      | 0.025500 | -478.116466      |
| <b>1a</b>                | -865.336397      | 0.353486          | 0.286252          | -864.982911      | 0.033617 | -865.016528      |
| <b>TS4A</b>              | -1266.137011     | 0.489319          | 0.403301          | -1265.647692     | 0.043009 | -1265.690701     |
| <b>INT4A</b>             | -1266.136680     | 0.489655          | 0.401886          | -1265.647025     | 0.043885 | -1265.690909     |

|                          |              |          |          |              |          |              |
|--------------------------|--------------|----------|----------|--------------|----------|--------------|
| <b>TS4B</b>              | -1266.127734 | 0.488699 | 0.404205 | -1265.639035 | 0.042247 | -1265.681282 |
| <b>INT4B</b>             | -1266.131868 | 0.488721 | 0.404234 | -1265.643147 | 0.042244 | -1265.685390 |
| <b>TS4A-concerted</b>    | -1266.096632 | 0.487777 | 0.402192 | -1265.608855 | 0.042793 | -1265.651647 |
| <b>TS5A</b>              | -1266.133623 | 0.489444 | 0.404832 | -1265.644179 | 0.042306 | -1265.686485 |
| <b>4a</b>                | -1266.237667 | 0.493168 | 0.409847 | -1265.744499 | 0.041661 | -1265.786159 |
| <b>1m</b>                | -786.940718  | 0.310823 | 0.250923 | -786.629895  | 0.029950 | -786.659845  |
| <b>TS4A-1m</b>           | -1187.737025 | 0.446427 | 0.367062 | -1187.290598 | 0.039683 | -1187.330280 |
| <b>INT4A-1m</b>          | -1187.736960 | 0.446913 | 0.368335 | -1187.290047 | 0.039289 | -1187.329336 |
| <b>TS4B-1m</b>           | -1187.754719 | 0.446722 | 0.369801 | -1187.307997 | 0.038461 | -1187.346457 |
| <b>INT4B-1m</b>          | -1187.764090 | 0.447796 | 0.370960 | -1187.316294 | 0.038418 | -1187.354712 |
| <b>TS4B-1m-concerted</b> | -1187.704826 | 0.444659 | 0.365201 | -1187.260167 | 0.039729 | -1187.299896 |
| <b>TS5B-1m</b>           | -1187.752395 | 0.447062 | 0.370987 | -1187.305333 | 0.038038 | -1187.343370 |
| <b>5i</b>                | -1187.840610 | 0.450012 | 0.372855 | -1187.390598 | 0.038579 | -1187.429176 |

**Note:** ZPE = zero-point vibrational energy;  $H_{\text{corr}}$  = thermal correction to enthalpy;  $G_{\text{corr}}$  = thermal correction to Gibbs free energy;  $E_{\text{ele}}$  = the electronic energies in solvent;  $0.5TS$  = 1/2 of the entropy,  $H_{\text{sol}}$  = enthalpies in solvent;  $G_{\text{sol}}$  = Gibbs free energies in solvent.

Mulliken charge analysis of **1a**

Natural Population

| Natural |          | -----   |         |         |         |
|---------|----------|---------|---------|---------|---------|
| Atom No | Charge   | Core    | Valence | Rydberg | Total   |
| C 1     | -0.15861 | 1.99890 | 4.14040 | 0.01931 | 6.15861 |
| C 2     | 0.71615  | 1.99918 | 3.24445 | 0.04022 | 5.28385 |
| O 3     | -0.72459 | 1.99980 | 6.70809 | 0.01670 | 8.72459 |
| N 4     | -0.47746 | 1.99932 | 5.46619 | 0.01195 | 7.47746 |
| C 5     | -0.28441 | 1.99927 | 4.26871 | 0.01643 | 6.28441 |
| H 6     | 0.27063  | 0.00000 | 0.72754 | 0.00184 | 0.72937 |
| H 7     | 0.27566  | 0.00000 | 0.72268 | 0.00166 | 0.72434 |
| C 8     | -0.28581 | 1.99928 | 4.26898 | 0.01755 | 6.28581 |
| H 9     | 0.28238  | 0.00000 | 0.71546 | 0.00216 | 0.71762 |
| H 10    | 0.27021  | 0.00000 | 0.72823 | 0.00155 | 0.72979 |
| C 11    | -0.06504 | 1.99905 | 4.05133 | 0.01466 | 6.06504 |
| C 12    | -0.25982 | 1.99905 | 4.24790 | 0.01287 | 6.25982 |
| C 13    | -0.25134 | 1.99905 | 4.23941 | 0.01287 | 6.25134 |
| C 14    | -0.24864 | 1.99913 | 4.23529 | 0.01422 | 6.24864 |
| H 15    | 0.26233  | 0.00000 | 0.73616 | 0.00152 | 0.73767 |
| C 16    | -0.25010 | 1.99914 | 4.23697 | 0.01399 | 6.25010 |
| H 17    | 0.26141  | 0.00000 | 0.73727 | 0.00132 | 0.73859 |
| C 18    | -0.26389 | 1.99913 | 4.25107 | 0.01368 | 6.26389 |
| H 19    | 0.26304  | 0.00000 | 0.73579 | 0.00117 | 0.73696 |
| H 20    | 0.26322  | 0.00000 | 0.73561 | 0.00116 | 0.73678 |
| H 21    | 0.26239  | 0.00000 | 0.73648 | 0.00113 | 0.73761 |
| C 22    | -0.05663 | 1.99905 | 4.04302 | 0.01456 | 6.05663 |
| C 23    | -0.26111 | 1.99906 | 4.24897 | 0.01308 | 6.26111 |
| C 24    | -0.25251 | 1.99906 | 4.24064 | 0.01281 | 6.25251 |

|   |    |          |         |         |         |         |
|---|----|----------|---------|---------|---------|---------|
| C | 25 | -0.24934 | 1.99913 | 4.23600 | 0.01421 | 6.24934 |
| H | 26 | 0.25763  | 0.00000 | 0.74091 | 0.00146 | 0.74237 |
| C | 27 | -0.25094 | 1.99914 | 4.23784 | 0.01397 | 6.25094 |
| H | 28 | 0.26028  | 0.00000 | 0.73840 | 0.00132 | 0.73972 |
| C | 29 | -0.26630 | 1.99913 | 4.25348 | 0.01369 | 6.26630 |
| H | 30 | 0.26208  | 0.00000 | 0.73675 | 0.00117 | 0.73792 |
| H | 31 | 0.26247  | 0.00000 | 0.73636 | 0.00117 | 0.73753 |
| H | 32 | 0.26164  | 0.00000 | 0.73723 | 0.00113 | 0.73836 |
| C | 33 | -0.45540 | 1.99929 | 4.44180 | 0.01431 | 6.45540 |
| H | 34 | 0.25147  | 0.00000 | 0.74641 | 0.00212 | 0.74853 |
| H | 35 | 0.26174  | 0.00000 | 0.73685 | 0.00142 | 0.73826 |
| C | 36 | -0.45500 | 1.99928 | 4.44052 | 0.01520 | 6.45500 |
| H | 37 | 0.26490  | 0.00000 | 0.73352 | 0.00158 | 0.73510 |
| H | 38 | 0.24525  | 0.00000 | 0.75273 | 0.00202 | 0.75475 |
| C | 39 | -0.22147 | 1.99906 | 4.20622 | 0.01620 | 6.22147 |
| H | 40 | 0.28355  | 0.00000 | 0.71534 | 0.00111 | 0.71645 |

---



---

\* Total \* -0.00000 41.98250 105.65703 0.36047 148.00000

#### Mulliken charge analysis of **1m**

|         |        | Natural Population |         |         |         |         |
|---------|--------|--------------------|---------|---------|---------|---------|
| Natural |        | -----              |         |         |         |         |
| Atom No | Charge | Core               | Valence | Rydberg | Total   |         |
| -----   |        |                    |         |         |         |         |
| C       | 1      | -0.12244           | 1.99881 | 4.10620 | 0.01743 | 6.12244 |
| C       | 2      | -0.00097           | 1.99896 | 3.98261 | 0.01939 | 6.00097 |
| C       | 3      | 0.71088            | 1.99917 | 3.24822 | 0.04173 | 5.28912 |
| O       | 4      | -0.74279           | 1.99980 | 6.72627 | 0.01673 | 8.74279 |



|   |    |          |         |         |         |         |
|---|----|----------|---------|---------|---------|---------|
| C | 5  | -0.44501 | 1.99920 | 4.42915 | 0.01667 | 6.44501 |
| H | 6  | 0.26115  | 0.00000 | 0.73702 | 0.00183 | 0.73885 |
| H | 7  | 0.27168  | 0.00000 | 0.72647 | 0.00185 | 0.72832 |
| C | 8  | -0.45473 | 1.99919 | 4.43998 | 0.01555 | 6.45473 |
| H | 9  | 0.26479  | 0.00000 | 0.73346 | 0.00175 | 0.73521 |
| H | 10 | 0.26300  | 0.00000 | 0.73505 | 0.00195 | 0.73700 |
| C | 11 | -0.08148 | 1.99900 | 4.06576 | 0.01671 | 6.08148 |
| C | 12 | -0.24739 | 1.99908 | 4.23556 | 0.01274 | 6.24739 |
| C | 13 | -0.24210 | 1.99908 | 4.22981 | 0.01320 | 6.24210 |
| C | 14 | -0.25078 | 1.99914 | 4.23748 | 0.01416 | 6.25078 |
| H | 15 | 0.26079  | 0.00000 | 0.73780 | 0.00141 | 0.73921 |
| C | 16 | -0.24987 | 1.99914 | 4.23666 | 0.01407 | 6.24987 |
| H | 17 | 0.26285  | 0.00000 | 0.73578 | 0.00137 | 0.73715 |
| C | 18 | -0.26428 | 1.99913 | 4.25142 | 0.01372 | 6.26428 |
| H | 19 | 0.26373  | 0.00000 | 0.73510 | 0.00117 | 0.73627 |
| H | 20 | 0.26380  | 0.00000 | 0.73504 | 0.00116 | 0.73620 |
| H | 21 | 0.26262  | 0.00000 | 0.73625 | 0.00112 | 0.73738 |
| C | 22 | -0.30472 | 1.99934 | 4.29026 | 0.01512 | 6.30472 |
| C | 23 | -0.30944 | 1.99935 | 4.29401 | 0.01609 | 6.30944 |
| C | 24 | -0.13080 | 1.99929 | 4.11258 | 0.01893 | 6.13080 |
| H | 25 | 0.25323  | 0.00000 | 0.74408 | 0.00269 | 0.74677 |
| H | 26 | 0.27430  | 0.00000 | 0.72428 | 0.00142 | 0.72570 |
| C | 27 | -0.13267 | 1.99929 | 4.11420 | 0.01918 | 6.13267 |
| H | 28 | 0.24985  | 0.00000 | 0.74769 | 0.00246 | 0.75015 |
| H | 29 | 0.27927  | 0.00000 | 0.71847 | 0.00226 | 0.72073 |
| H | 30 | 0.25386  | 0.00000 | 0.74492 | 0.00122 | 0.74614 |
| H | 31 | 0.21652  | 0.00000 | 0.78104 | 0.00244 | 0.78348 |
| H | 32 | 0.25358  | 0.00000 | 0.74522 | 0.00121 | 0.74642 |
| H | 33 | 0.21861  | 0.00000 | 0.77863 | 0.00276 | 0.78139 |

|   |    |          |         |         |         |         |
|---|----|----------|---------|---------|---------|---------|
| N | 34 | -0.48478 | 1.99930 | 5.47213 | 0.01335 | 7.48478 |
| O | 35 | -0.62028 | 1.99981 | 6.60781 | 0.01266 | 8.62028 |

---



---

\* Total \* -0.00000 35.98607 93.67643 0.33750 130.00000

**Cartesian Coordinate (unit:angstrom)**

|           |           |           |           |                   |           |           |           |
|-----------|-----------|-----------|-----------|-------------------|-----------|-----------|-----------|
| <b>2a</b> |           |           |           | H                 | 1.200271  | 0.323657  | 1.693805  |
| C         | 2.279989  | 0.327784  | 0.041199  | H                 | 2.080062  | 1.270885  | 0.468606  |
| C         | 1.845696  | -1.000158 | 0.045277  | H                 | -2.080127 | 1.271047  | 0.467854  |
| C         | 0.487045  | -1.300756 | -0.004479 | H                 | -1.200834 | 0.323897  | 1.693522  |
| C         | -0.459899 | -0.266732 | -0.066557 | H                 | -0.000039 | -1.758924 | 0.912140  |
| C         | -0.030290 | 1.065150  | -0.068658 | N                 | -1.201098 | -0.470798 | -0.288287 |
| C         | 1.333623  | 1.351806  | -0.013283 | N                 | 1.201123  | -0.470715 | -0.287995 |
| H         | 3.339649  | 0.558909  | 0.084151  | N                 | -0.000036 | 1.493523  | 0.462907  |
| H         | 2.567992  | -1.810097 | 0.093851  | C                 | 0.000005  | 2.216410  | -0.813929 |
| H         | 0.156283  | -2.336795 | -0.002987 | H                 | -0.884627 | 2.859648  | -0.858289 |
| H         | -0.767772 | 1.857671  | -0.094673 | H                 | 0.885187  | 2.858886  | -0.858582 |
| H         | 1.655971  | 2.389348  | -0.009183 | H                 | -0.000481 | 1.551838  | -1.686849 |
| N         | -1.826651 | -0.609738 | -0.212636 | C                 | -2.406293 | -1.269855 | -0.140966 |
| H         | -2.057547 | -1.437661 | 0.332002  | H                 | -2.517291 | -1.721683 | 0.864525  |
| O         | -2.707570 | 0.415035  | 0.254280  | H                 | -3.285387 | -0.644590 | -0.327454 |
| H         | -3.184445 | 0.663948  | -0.549945 | H                 | -2.407376 | -2.081153 | -0.876432 |
|           |           |           |           | C                 | 2.406435  | -1.269665 | -0.141122 |
| <b>N3</b> |           |           |           | H                 | 2.517508  | -1.722040 | 0.864115  |
| C         | 1.181522  | 0.668715  | 0.640034  | H                 | 2.407652  | -2.080545 | -0.877048 |
| C         | 0.000058  | -1.278410 | -0.102999 | H                 | 3.285419  | -0.644144 | -0.327240 |
| C         | -1.181722 | 0.668844  | 0.639762  |                   |           |           |           |
| H         | 0.000106  | -2.087071 | -0.843728 | CH <sub>2</sub> O |           |           |           |

|             |           |           |           |              |           |           |           |
|-------------|-----------|-----------|-----------|--------------|-----------|-----------|-----------|
| C           | -0.000006 | 0.529027  | 0.000000  | N            | -1.661732 | 1.635825  | -0.544766 |
| H           | 0.937942  | 1.124849  | 0.000000  | N            | -2.759245 | 0.452622  | 1.242475  |
| H           | -0.937864 | 1.125001  | 0.000000  | C            | -1.691378 | 0.413840  | 2.259581  |
| O           | -0.000006 | -0.678001 | 0.000000  | H            | -1.996066 | 1.024736  | 3.115471  |
|             |           |           |           | H            | -1.522315 | -0.621181 | 2.560549  |
|             |           |           |           | H            | -0.737605 | 0.793210  | 1.874236  |
| <b>TS1A</b> |           |           |           | C            | -1.492661 | 2.893411  | -1.259705 |
| C           | 4.258113  | 1.508417  | 0.257559  | H            | -2.360499 | 3.162756  | -1.889011 |
| C           | 2.950499  | 1.962052  | 0.452927  | H            | -1.333164 | 3.698322  | -0.537050 |
| C           | 1.870838  | 1.099532  | 0.273335  | H            | -0.606283 | 2.835790  | -1.898957 |
| C           | 2.091505  | -0.239738 | -0.084286 | C            | -1.929098 | -1.976885 | -1.499526 |
| C           | 3.403047  | -0.695397 | -0.284309 | H            | -2.938687 | -2.047774 | -1.912059 |
| C           | 4.475676  | 0.180431  | -0.116749 | H            | -1.187714 | -1.940680 | -2.297234 |
| H           | 5.097656  | 2.184853  | 0.388102  | H            | -1.681694 | -2.802001 | -0.829295 |
| H           | 2.770286  | 2.997173  | 0.731025  | N            | -1.804451 | -0.749479 | -0.669890 |
| H           | 0.847254  | 1.446833  | 0.380380  | N            | 0.949023  | -1.084452 | -0.194686 |
| H           | 3.559475  | -1.728411 | -0.572421 | C            | 0.611215  | -1.889228 | 1.172267  |
| H           | 5.489184  | -0.179716 | -0.272367 | H            | 0.892280  | -1.103154 | 1.918092  |
| H           | -0.857903 | -0.848119 | -0.198820 | H            | 1.419795  | -2.659574 | 1.177441  |
| O           | 1.210480  | -2.148075 | -1.164201 | O            | -0.624082 | -2.307155 | 1.186847  |
| H           | 1.335092  | -1.661086 | -1.993117 |              |           |           |           |
| C           | -2.876992 | -0.706527 | 0.424971  |              |           |           |           |
| C           | -1.800692 | 0.516111  | -1.450146 | <b>INT1A</b> |           |           |           |
| C           | -2.760868 | 1.655622  | 0.439368  | C            | -2.211599 | -1.286531 | -0.030334 |
| H           | -0.943780 | 0.484006  | -2.129293 | C            | -0.837908 | -1.195918 | -0.216700 |
| H           | -3.836657 | -0.706024 | -0.107841 | C            | -0.181884 | 0.068511  | -0.197106 |
| H           | -2.720044 | -1.618129 | 0.996956  | C            | -0.985787 | 1.219100  | 0.025910  |
| H           | -2.625252 | 2.527582  | 1.084760  | C            | -2.358281 | 1.099935  | 0.208336  |
| H           | -3.741947 | 1.749180  | -0.065811 | C            | -2.997840 | -0.146493 | 0.183243  |
| H           | -2.732976 | 0.541787  | -2.048539 | H            | -2.680771 | -2.269651 | -0.050972 |

|              |           |           |           |             |           |           |           |
|--------------|-----------|-----------|-----------|-------------|-----------|-----------|-----------|
| H            | -0.252570 | -2.092427 | -0.395240 | H           | -2.508899 | -1.952788 | 0.762547  |
| H            | -0.490586 | 2.181286  | 0.060036  | H           | -3.181519 | -0.902281 | -0.507412 |
| H            | -2.945295 | 2.001942  | 0.380201  | H           | -2.180024 | -2.286855 | -0.957999 |
| H            | -4.072864 | -0.227353 | 0.322440  | C           | 2.585037  | -1.072363 | -0.137227 |
| O            | 1.744599  | 1.399928  | -0.217854 | H           | 2.713032  | -1.368110 | 0.905095  |
| H            | 2.642310  | 0.983999  | 0.135958  | H           | 2.636520  | -1.952163 | -0.780539 |
| N            | 1.153159  | 0.141258  | -0.447415 | H           | 3.363528  | -0.361605 | -0.417041 |
| C            | 2.170704  | -0.940915 | 0.138068  | H           | 1.119898  | -0.122716 | -1.264002 |
| H            | 2.216843  | -1.720387 | -0.665768 | N           | 1.251694  | -0.419785 | -0.292102 |
| H            | 1.613475  | -1.407725 | 0.995627  |             |           |           |           |
| O            | 3.294515  | -0.318006 | 0.427993  | <b>TS2A</b> |           |           |           |
|              |           |           |           | C           | -2.217402 | -1.288742 | -0.010855 |
| <b>INT1B</b> |           |           |           | C           | -0.836201 | -1.203263 | -0.131579 |
| C            | 1.096894  | 0.877453  | 0.606537  | C           | -0.183802 | 0.067196  | -0.132113 |
| C            | 0.090288  | -1.342118 | 0.031063  | C           | -1.004032 | 1.224867  | 0.007527  |
| C            | -1.242741 | 0.535096  | 0.689676  | C           | -2.380953 | 1.104837  | 0.127639  |
| H            | 0.162989  | -2.220848 | -0.615049 | C           | -3.017955 | -0.145652 | 0.119223  |
| H            | 1.238659  | 0.494574  | 1.622293  | H           | -2.682374 | -2.274453 | -0.015011 |
| H            | 1.920477  | 1.536590  | 0.328321  | H           | -0.245823 | -2.107861 | -0.238321 |
| H            | -2.199942 | 1.026629  | 0.509739  | H           | -0.509116 | 2.187799  | 0.026389  |
| H            | -1.204430 | 0.227639  | 1.749453  | H           | -2.977830 | 2.010387  | 0.237081  |
| H            | 0.249291  | -1.654875 | 1.079775  | H           | -4.098025 | -0.226154 | 0.210437  |
| N            | -1.127897 | -0.623097 | -0.216397 | O           | 1.777006  | 1.391130  | -0.114895 |
| N            | -0.160866 | 1.477889  | 0.439043  | H           | 2.788804  | 0.813062  | 0.133608  |
| C            | -0.336518 | 2.307024  | -0.762597 | N           | 1.149463  | 0.164248  | -0.313157 |
| H            | -1.231962 | 2.919284  | -0.637824 | C           | 2.145127  | -0.936224 | 0.077606  |
| H            | 0.516143  | 2.982092  | -0.866302 | H           | 2.135470  | -1.684481 | -0.748932 |
| H            | -0.452948 | 1.717813  | -1.683343 | H           | 1.723143  | -1.453827 | 0.975907  |
| C            | -2.309848 | -1.492996 | -0.217704 | O           | 3.321847  | -0.310170 | 0.273177  |

|              |           |           |           |           |           |           |           |
|--------------|-----------|-----------|-----------|-----------|-----------|-----------|-----------|
|              |           |           | H         | -4.394435 | -2.361072 | -0.539359 |           |
| <b>INT2A</b> |           |           | H         | -2.341432 | -1.436204 | -1.542516 |           |
| C            | 3.031467  | -0.173393 | -0.000077 | H         | -2.698597 | 2.077652  | 0.883925  |
| C            | 2.203851  | -1.304941 | 0.000002  | H         | -4.753234 | 1.119938  | 1.958316  |
| C            | 0.818333  | -1.205527 | 0.000014  | H         | 0.843734  | -0.860285 | -0.365382 |
| C            | 0.182121  | 0.080602  | -0.000178 | O         | -0.701472 | 2.043087  | -0.324677 |
| C            | 1.034726  | 1.232084  | -0.000096 | C         | 2.410609  | -1.606113 | 0.957637  |
| C            | 2.410952  | 1.089850  | -0.000067 | C         | 1.365894  | 0.624946  | 1.048485  |
| H            | 4.114037  | -0.269167 | 0.000176  | C         | 3.696518  | 0.367838  | 0.601646  |
| H            | 2.652547  | -2.298845 | 0.000144  | H         | 0.454219  | 1.194279  | 0.763731  |
| H            | 0.218158  | -2.110012 | 0.000151  | H         | 2.574625  | -1.588994 | 2.042706  |
| H            | 0.551934  | 2.201320  | -0.000123 | H         | 2.230012  | -2.635198 | 0.637068  |
| H            | 3.028272  | 1.988910  | -0.000084 | H         | 4.537048  | 0.774169  | 0.031852  |
| O            | -1.772620 | 1.443132  | 0.000608  | H         | 3.936869  | 0.456640  | 1.679324  |
| N            | -1.148704 | 0.224320  | -0.000433 | H         | 1.565154  | 0.673206  | 2.139714  |
| C            | -2.098993 | -0.917023 | 0.000599  | N         | 2.476881  | 1.078262  | 0.247078  |
| H            | -1.910182 | -1.551930 | 0.892786  | N         | 3.553720  | -1.056914 | 0.289012  |
| H            | -1.909338 | -1.554284 | -0.889599 | C         | 3.605352  | -1.316647 | -1.153312 |
| O            | -3.368761 | -0.369386 | -0.000787 | H         | 4.610567  | -1.083889 | -1.517227 |
| H            | -3.068202 | 0.623880  | -0.000177 | H         | 3.417050  | -2.377622 | -1.340816 |
|              |           |           | H         | 2.881535  | -0.716451 | -1.719657 |           |
| <b>TS3A</b>  |           |           | C         | 2.559263  | 2.531663  | 0.169589  |           |
| C            | -4.728438 | -0.676681 | 0.766193  | H         | 2.780538  | 3.012172  | 1.139477  |
| C            | -4.047022 | -1.377890 | -0.232484 | H         | 3.350027  | 2.810250  | -0.534687 |
| C            | -2.903937 | -0.847206 | -0.826914 | H         | 1.598782  | 2.897956  | -0.203299 |
| C            | -2.438969 | 0.425159  | -0.437601 | C         | -0.011045 | -1.381555 | 1.476401  |
| C            | -3.104864 | 1.119361  | 0.587441  | H         | 0.216876  | -1.395192 | 2.546221  |
| C            | -4.241696 | 0.568882  | 1.173333  | H         | -0.892482 | -0.767129 | 1.292302  |
| H            | -5.612798 | -1.102308 | 1.230760  | H         | -0.204716 | -2.396086 | 1.123525  |

|                          |           |           |           |           |           |           |           |
|--------------------------|-----------|-----------|-----------|-----------|-----------|-----------|-----------|
| N                        | 1.132061  | -0.820814 | 0.717615  | C         | 0.228082  | -1.288022 | -0.218018 |
| N                        | -1.295447 | 1.019860  | -1.006839 | C         | 1.607102  | 0.652576  | -0.468533 |
| C                        | -0.693200 | 0.493716  | -2.083035 | H         | -0.044249 | -2.101557 | 0.463488  |
| H                        | -1.341199 | 0.014147  | -2.810618 | H         | -0.268897 | 0.356269  | -2.295540 |
| H                        | 0.082532  | 1.145592  | -2.467884 | H         | -1.502860 | 1.309949  | -1.434421 |
| O                        | 0.250319  | -0.975119 | -1.680395 | H         | 2.392317  | 1.240124  | 0.017603  |
| H                        | 0.887255  | -1.094924 | -2.399243 | H         | 1.994978  | 0.314273  | -1.451151 |
|                          |           |           |           | H         | 0.574182  | -1.750297 | -1.177614 |
| <b>INT3A</b>             |           |           |           | N         | 1.279133  | -0.489452 | 0.393383  |
| C                        | 1.829119  | -1.184983 | -0.213780 | N         | 0.449841  | 1.495062  | -0.711819 |
| C                        | 0.436447  | -1.185058 | -0.187088 | C         | 0.020785  | 2.242432  | 0.479055  |
| C                        | -0.237523 | 0.019200  | 0.007228  | H         | 0.854574  | 2.861617  | 0.823780  |
| C                        | 0.454576  | 1.212290  | 0.213852  | H         | -0.796002 | 2.914842  | 0.195324  |
| C                        | 1.849733  | 1.198566  | 0.192707  | H         | -0.311973 | 1.605264  | 1.307443  |
| C                        | 2.538216  | 0.004590  | -0.027586 | C         | 2.445328  | -1.294773 | 0.716376  |
| H                        | 2.361670  | -2.117089 | -0.375220 | H         | 2.924993  | -1.753994 | -0.170071 |
| H                        | -0.144969 | -2.091329 | -0.303357 | H         | 3.191342  | -0.670815 | 1.218211  |
| H                        | -0.082289 | 2.131585  | 0.419917  | H         | 2.161633  | -2.098232 | 1.403412  |
| H                        | 2.396010  | 2.121177  | 0.362597  | C         | -2.043208 | -1.253523 | -1.045597 |
| H                        | 3.623811  | -0.001201 | -0.041474 | H         | -1.774732 | -1.697543 | -2.020484 |
| N                        | -1.702245 | -0.031507 | 0.020115  | H         | -2.321999 | -2.058581 | -0.359501 |
| C                        | -2.395727 | 0.977913  | -0.448969 | H         | -2.919770 | -0.614868 | -1.190567 |
| H                        | -1.888949 | 1.816649  | -0.898851 | N         | -0.963259 | -0.466379 | -0.458790 |
| H                        | -3.471260 | 0.899524  | -0.395530 | O         | -1.912450 | -0.080344 | 2.210063  |
| O                        | -2.215919 | -1.099235 | 0.484116  | H         | -2.571938 | 0.620865  | 2.144918  |
| <b>N3-H<sub>2</sub>O</b> |           |           |           | <b>1a</b> |           |           |           |
| H                        | -1.557569 | -0.147283 | 1.296346  | C         | -0.920888 | 2.595387  | -0.520039 |
| C                        | -0.605495 | 0.697659  | -1.298466 | C         | -2.006507 | 3.496795  | 0.031286  |

|   |           |           |           |             |           |           |           |
|---|-----------|-----------|-----------|-------------|-----------|-----------|-----------|
| H | -2.224865 | 3.627119  | 1.081941  | H           | 5.171528  | 0.894243  | -0.521957 |
| C | 0.056419  | 1.883272  | 0.342000  | H           | 4.045418  | -3.256307 | -0.588869 |
| O | 0.791627  | 2.523556  | 1.097310  | H           | 5.695866  | -1.467416 | -1.093538 |
| N | 0.086722  | 0.509066  | 0.287086  | C           | -0.888746 | 4.085156  | -0.752581 |
| C | -0.485257 | -0.291746 | -0.786950 | H           | -1.077308 | 4.451276  | -1.764174 |
| H | -0.833884 | 0.377755  | -1.575430 | H           | -0.129537 | 4.625292  | -0.193581 |
| H | 0.316657  | -0.897668 | -1.228961 | C           | -2.370361 | 2.350367  | -0.855984 |
| C | 0.973752  | -0.207261 | 1.217098  | H           | -2.849860 | 1.493618  | -0.387766 |
| H | 1.120528  | 0.443205  | 2.080270  | H           | -2.714114 | 2.549808  | -1.874451 |
| H | 0.447342  | -1.109334 | 1.545632  |             |           |           |           |
| C | -1.617702 | -1.206144 | -0.347093 | <b>TS4A</b> |           |           |           |
| C | -2.368878 | -0.945999 | 0.803928  | C           | -0.206681 | -1.919218 | -0.209836 |
| C | -1.941026 | -2.324407 | -1.125275 | C           | 1.044258  | -1.101581 | -0.346774 |
| C | -3.429346 | -1.780011 | 1.164582  | C           | 0.469291  | -3.216260 | 0.108951  |
| H | -2.110190 | -0.092519 | 1.423669  | H           | 1.033776  | -0.047240 | -0.089242 |
| C | -3.002806 | -3.155743 | -0.770756 | H           | 1.650249  | -1.292964 | -1.237583 |
| H | -1.355304 | -2.544486 | -2.015016 | H           | -0.075931 | -3.901472 | 0.754876  |
| C | -3.751932 | -2.885278 | 0.377012  | H           | 0.984573  | -3.708594 | -0.719353 |
| H | -4.000435 | -1.566280 | 2.063517  | C           | 4.273441  | -0.699148 | -0.189504 |
| H | -3.241291 | -4.018793 | -1.385708 | C           | 5.144993  | -0.357395 | -1.231943 |
| H | -4.575564 | -3.535146 | 0.657207  | C           | 3.752730  | 0.296357  | 0.652434  |
| C | 2.303848  | -0.571548 | 0.590195  | C           | 5.500067  | 0.974090  | -1.419657 |
| C | 3.238018  | 0.433779  | 0.299010  | H           | 5.510774  | -1.148609 | -1.873471 |
| C | 2.605057  | -1.897437 | 0.262706  | C           | 4.103592  | 1.628055  | 0.439349  |
| C | 4.451886  | 0.110165  | -0.303861 | H           | 3.049278  | 0.056209  | 1.439381  |
| H | 2.994129  | 1.461719  | 0.550019  | C           | 4.979160  | 1.972958  | -0.591210 |
| C | 3.822737  | -2.222321 | -0.341110 | H           | 6.180638  | 1.235407  | -2.224403 |
| H | 1.883013  | -2.680122 | 0.484259  | H           | 3.665547  | 2.396243  | 1.068003  |
| C | 4.748032  | -1.218339 | -0.625026 | H           | 5.246716  | 3.012468  | -0.753473 |

|   |           |           |           |              |           |           |           |
|---|-----------|-----------|-----------|--------------|-----------|-----------|-----------|
| O | -2.050619 | -2.399587 | 1.174052  | H            | 1.667137  | 4.709278  | 1.201501  |
| N | -1.932394 | -0.263837 | 0.367644  | O            | 4.131634  | -2.864113 | -1.055551 |
| C | -1.495247 | 0.702816  | -0.626424 | C            | 3.188614  | -2.514933 | 1.007764  |
| H | -2.389622 | 1.130176  | -1.099050 | H            | 3.156475  | -3.596143 | 1.061289  |
| H | -0.960965 | 0.182328  | -1.425517 | H            | 3.373075  | -1.988500 | 1.937404  |
| C | -3.139427 | 0.099206  | 1.124844  | N            | 3.906757  | -2.081969 | -0.060439 |
| H | -3.185457 | -0.566300 | 1.987840  | C            | 1.303129  | -2.111463 | 0.756245  |
| H | -3.010800 | 1.126482  | 1.483627  | C            | -1.450710 | -1.559151 | 0.487124  |
| C | -4.406187 | -0.011550 | 0.300363  | H            | 0.998356  | -1.816935 | 1.759316  |
| C | -5.103476 | 1.130671  | -0.105970 |              |           |           |           |
| C | -4.875342 | -1.274180 | -0.092586 | <b>INT4A</b> |           |           |           |
| C | -6.255293 | 1.020945  | -0.890025 | C            | -0.110658 | -1.852957 | -0.432132 |
| H | -4.746207 | 2.112257  | 0.197609  | C            | 0.750486  | -3.058251 | -0.307090 |
| C | -6.023116 | -1.383716 | -0.874682 | C            | 0.984147  | -1.007785 | -0.984217 |
| H | -4.326564 | -2.156248 | 0.223394  | H            | 0.667738  | -3.740315 | -1.165884 |
| C | -6.716368 | -0.237113 | -1.275795 | H            | 0.668765  | -3.646322 | 0.612056  |
| H | -6.788145 | 1.916212  | -1.197736 | H            | 0.973999  | -0.785120 | -2.059860 |
| H | -6.381454 | -2.365486 | -1.171260 | H            | 1.185285  | -0.031927 | -0.475890 |
| H | -7.611386 | -0.326446 | -1.884803 | N            | 3.351434  | -0.474131 | 0.667476  |
| C | -0.631586 | 1.833465  | -0.079584 | O            | 2.533116  | 0.523860  | 0.728543  |
| C | -0.240412 | 2.870966  | -0.935809 | C            | 4.658553  | -0.280764 | 0.201751  |
| C | -0.184940 | 1.850847  | 1.245672  | C            | 5.102626  | 1.040097  | -0.012571 |
| C | 0.585897  | 3.896934  | -0.481101 | C            | 5.539591  | -1.357592 | -0.029347 |
| H | -0.580468 | 2.868614  | -1.969006 | C            | 6.402280  | 1.268796  | -0.444320 |
| C | 0.637959  | 2.881828  | 1.706685  | H            | 4.409754  | 1.851800  | 0.166869  |
| H | -0.478706 | 1.045270  | 1.911520  | C            | 6.838660  | -1.105159 | -0.457026 |
| C | 1.027973  | 3.906895  | 0.844841  | H            | 5.216465  | -2.382217 | 0.108566  |
| H | 0.885228  | 4.689838  | -1.160320 | C            | 7.281429  | 0.203616  | -0.667634 |
| H | 0.971293  | 2.882465  | 2.740790  | H            | 6.734506  | 2.289693  | -0.607799 |



|   |           |           |           |             |           |           |           |
|---|-----------|-----------|-----------|-------------|-----------|-----------|-----------|
| H | 7.508563  | -1.941218 | -0.634039 | H           | -7.119196 | 1.249538  | -0.802634 |
| H | 8.296208  | 0.390311  | -1.003862 | H           | -6.367580 | -2.983066 | -0.659746 |
| O | -1.758713 | -2.559210 | 1.051235  | H           | -7.829263 | -1.078841 | -1.305634 |
| N | -1.971438 | -0.416229 | 0.259477  | C           | 2.698827  | -1.767977 | 0.764889  |
| C | -3.103216 | -0.173573 | 1.160724  | H           | 3.402525  | -2.548375 | 1.057915  |
| H | -3.035453 | 0.863660  | 1.506296  | H           | 1.938063  | -1.651106 | 1.544721  |
| H | -2.975063 | -0.835976 | 2.017593  | C           | 1.988583  | -2.113815 | -0.561457 |
| C | -1.792496 | 0.555373  | -0.809293 | H           | 2.704921  | -2.439607 | -1.321958 |
| H | -1.121034 | 0.132071  | -1.558537 | C           | -1.332749 | -1.644793 | 0.320723  |
| H | -2.756357 | 0.696867  | -1.316947 |             |           |           |           |
| C | -1.273543 | 1.901671  | -0.333461 | <b>TS4B</b> |           |           |           |
| C | -0.289928 | 1.984806  | 0.658997  | C           | 0.011329  | -2.389496 | 2.515519  |
| C | -1.757632 | 3.081728  | -0.908948 | C           | 0.701213  | -3.423244 | 1.716028  |
| C | 0.215401  | 3.224082  | 1.051124  | C           | 0.892687  | -1.246983 | 2.149308  |
| H | 0.091062  | 1.080588  | 1.120376  | H           | 0.115397  | -4.223867 | 1.270249  |
| C | -1.256272 | 4.323350  | -0.515039 | H           | 1.665371  | -3.775466 | 2.108774  |
| H | -2.533145 | 3.027539  | -1.669720 | H           | 0.458109  | -0.248702 | 2.130732  |
| C | -0.265429 | 4.397089  | 0.465746  | H           | 1.874588  | -1.238239 | 2.637349  |
| H | 0.989835  | 3.267569  | 1.810982  | N           | 2.680331  | -1.290934 | -0.942747 |
| H | -1.643045 | 5.231208  | -0.969375 | O           | 2.096221  | -1.284110 | -2.102463 |
| H | 0.126415  | 5.362275  | 0.773557  | C           | 3.454053  | -0.155138 | -0.574382 |
| C | -4.442436 | -0.419294 | 0.494258  | C           | 3.706847  | 0.802726  | -1.570688 |
| C | -5.268459 | 0.646939  | 0.124055  | C           | 3.950880  | 0.046830  | 0.725333  |
| C | -4.846109 | -1.730591 | 0.201951  | C           | 4.449605  | 1.938681  | -1.266180 |
| C | -6.485464 | 0.412921  | -0.521895 | H           | 3.310680  | 0.620423  | -2.560745 |
| H | -4.956620 | 1.665446  | 0.344455  | C           | 4.693357  | 1.189167  | 1.012540  |
| C | -6.059840 | -1.964110 | -0.441699 | H           | 3.751152  | -0.664487 | 1.516503  |
| H | -4.191692 | -2.550672 | 0.482728  | C           | 4.946920  | 2.142707  | 0.023747  |
| C | -6.883161 | -0.893553 | -0.804945 | H           | 4.642087  | 2.671252  | -2.044607 |

|   |           |           |           |              |           |           |           |
|---|-----------|-----------|-----------|--------------|-----------|-----------|-----------|
| H | 5.066655  | 1.337617  | 2.021373  | C            | -1.540117 | 1.416944  | 1.115264  |
| H | 5.519652  | 3.034457  | 0.257786  | C            | -0.734179 | 4.017441  | 0.516839  |
| C | -0.251017 | -1.977860 | -0.155651 | H            | 0.689816  | 3.099409  | -0.815731 |
| O | -0.838495 | -2.994808 | -0.528655 | C            | -2.166678 | 2.500793  | 1.730669  |
| C | 0.891322  | -2.130947 | 0.866338  | H            | -1.880307 | 0.406466  | 1.316325  |
| C | 2.381422  | -2.309878 | -0.057959 | C            | -1.765440 | 3.804191  | 1.434380  |
| H | 3.137617  | -2.473492 | 0.707342  | H            | -0.418597 | 5.028861  | 0.277105  |
| H | 2.135411  | -3.205147 | -0.623881 | H            | -2.977870 | 2.324796  | 2.430908  |
| C | 0.230646  | 0.465226  | -0.449822 | H            | -2.256812 | 4.648575  | 1.908869  |
| C | -1.589621 | -0.682505 | -1.703071 |              |           |           |           |
| H | 0.647889  | 0.753593  | -1.421680 | <b>INT4B</b> |           |           |           |
| H | 1.097362  | 0.229630  | 0.161680  | C            | -0.673318 | -4.521836 | -0.042428 |
| H | -1.294703 | 0.117072  | -2.387432 | C            | 0.012952  | -4.082408 | -1.278096 |
| H | -1.545582 | -1.629730 | -2.244141 | C            | -0.774476 | -3.162852 | 0.520736  |
| N | -0.566920 | -0.741669 | -0.637225 | H            | -0.669546 | -3.859741 | -2.112682 |
| H | -1.070364 | -2.303438 | 2.544233  | H            | 0.848212  | -4.663329 | -1.684788 |
| C | -2.989673 | -0.433382 | -1.179180 | H            | -1.751529 | -2.670799 | 0.409838  |
| C | -3.626940 | 0.792373  | -1.394095 | H            | -0.446606 | -2.991842 | 1.565427  |
| C | -3.650585 | -1.422848 | -0.436469 | N            | 1.933673  | -1.796607 | 1.064012  |
| C | -4.897668 | 1.036599  | -0.871135 | O            | 1.259112  | -2.006249 | 2.161389  |
| H | -3.113773 | 1.570609  | -1.952800 | C            | 2.619798  | -0.595842 | 0.869835  |
| C | -4.917768 | -1.177617 | 0.091639  | C            | 2.649598  | 0.333606  | 1.931544  |
| H | -3.157554 | -2.376753 | -0.279112 | C            | 3.311465  | -0.298819 | -0.326234 |
| C | -5.544727 | 0.052972  | -0.122722 | C            | 3.371330  | 1.512932  | 1.801449  |
| H | -5.376081 | 1.996868  | -1.040937 | H            | 2.108888  | 0.091517  | 2.836995  |
| H | -5.420738 | -1.950289 | 0.666658  | C            | 4.048470  | 0.877024  | -0.423386 |
| H | -6.532269 | 0.241580  | 0.288718  | H            | 3.256123  | -0.957302 | -1.184001 |
| C | -0.509961 | 1.622260  | 0.191105  | C            | 4.089404  | 1.791500  | 0.633639  |
| C | -0.113044 | 2.932314  | -0.101487 | H            | 3.381830  | 2.220112  | 2.625749  |

|   |           |           |           |                       |           |           |           |
|---|-----------|-----------|-----------|-----------------------|-----------|-----------|-----------|
| H | 4.581147  | 1.088135  | -1.346042 | C                     | 0.943624  | 2.528809  | -1.033317 |
| H | 4.665041  | 2.707323  | 0.545258  | C                     | -1.161481 | 4.276685  | -0.499704 |
| C | 0.134101  | -1.482203 | -1.445175 | H                     | -2.437733 | 2.725721  | -1.283094 |
| O | 0.532054  | -1.592044 | -2.607083 | C                     | 1.199682  | 3.770383  | -0.455551 |
| C | 0.288609  | -2.714566 | -0.541012 | H                     | 1.759815  | 1.840104  | -1.220986 |
| C | 1.718048  | -2.790033 | 0.047100  | C                     | 0.146977  | 4.650497  | -0.190656 |
| H | 2.449519  | -2.713334 | -0.756294 | H                     | -1.985841 | 4.952505  | -0.291050 |
| H | 1.800305  | -3.774478 | 0.535834  | H                     | 2.220918  | 4.042806  | -0.207018 |
| C | -0.635809 | 0.778082  | -1.928654 | H                     | 0.345532  | 5.619758  | 0.257771  |
| C | -0.811005 | -0.077478 | 0.420010  |                       |           |           |           |
| H | -1.673179 | 0.722906  | -2.278919 | <b>TS4A-concerted</b> |           |           |           |
| H | 0.012560  | 0.577203  | -2.782188 | C                     | -0.743483 | -3.265993 | 0.065725  |
| H | -0.419330 | -0.859176 | 1.069263  | C                     | -1.090687 | -2.701401 | 1.419039  |
| H | -0.321359 | 0.838618  | 0.762689  | C                     | -0.052215 | -1.799673 | 0.814265  |
| N | -0.399216 | -0.318970 | -0.961386 | C                     | 0.721275  | -2.915654 | 0.149617  |
| H | -0.781895 | -5.498120 | 0.413240  | H                     | -1.207651 | -4.082457 | -0.480604 |
| C | -2.312576 | 0.066282  | 0.595557  | H                     | -0.779783 | -3.278478 | 2.306736  |
| C | -3.221756 | -0.556970 | -0.266962 | H                     | -2.086949 | -2.278735 | 1.560832  |
| C | -2.809139 | 0.829216  | 1.659074  | H                     | 1.354024  | -3.530070 | 0.813089  |
| C | -4.597758 | -0.429911 | -0.065440 | H                     | 1.252327  | -2.710555 | -0.782740 |
| H | -2.848496 | -1.132243 | -1.109616 | C                     | -1.859723 | -2.250301 | -1.606220 |
| C | -4.182103 | 0.953049  | 1.867028  | H                     | -0.973256 | -2.319796 | -2.222575 |
| H | -2.112017 | 1.334175  | 2.322923  | H                     | -2.679237 | -2.938935 | -1.765808 |
| C | -5.082421 | 0.323216  | 1.004123  | N                     | -2.151746 | -1.033376 | -1.145839 |
| H | -5.289144 | -0.916561 | -0.747413 | O                     | -1.163603 | -0.244513 | -0.899561 |
| H | -4.550219 | 1.548760  | 2.697380  | C                     | -3.437535 | -0.693919 | -0.593316 |
| H | -6.152128 | 0.425038  | 1.161019  | C                     | -3.480520 | 0.061414  | 0.583236  |
| C | -0.366296 | 2.144808  | -1.344768 | C                     | -4.608249 | -1.082733 | -1.249867 |
| C | -1.416151 | 3.026434  | -1.067399 | C                     | -4.722619 | 0.401833  | 1.113473  |

|   |           |           |           |             |           |           |           |
|---|-----------|-----------|-----------|-------------|-----------|-----------|-----------|
| H | -2.555525 | 0.337090  | 1.077774  | C           | 3.632148  | -1.205232 | 0.797166  |
| C | -5.843084 | -0.733539 | -0.703728 | C           | 5.209724  | -1.553429 | -1.474040 |
| H | -4.555210 | -1.623917 | -2.188908 | H           | 3.657674  | -0.490643 | -2.521283 |
| C | -5.903699 | 0.007312  | 0.477776  | C           | 4.855017  | -1.874321 | 0.890166  |
| H | -4.765455 | 0.974705  | 2.034604  | H           | 3.014322  | -1.068879 | 1.679062  |
| H | -6.755863 | -1.028228 | -1.212399 | C           | 5.646807  | -2.052460 | -0.243950 |
| H | -6.866465 | 0.280686  | 0.898561  | H           | 5.820880  | -1.683884 | -2.362722 |
| C | 0.163653  | -0.393033 | 1.228349  | H           | 5.187087  | -2.256138 | 1.851527  |
| O | -0.516133 | 0.043214  | 2.166431  | H           | 6.597333  | -2.572896 | -0.172190 |
| N | 1.190086  | 0.338386  | 0.675720  |             |           |           |           |
| C | 1.849867  | 0.004902  | -0.575509 | <b>TS5A</b> |           |           |           |
| H | 1.994581  | 0.941320  | -1.127639 | C           | 0.000214  | -1.644512 | -0.803025 |
| H | 1.159465  | -0.578845 | -1.186333 | C           | -1.196620 | -0.764393 | -0.734074 |
| C | 1.543534  | 1.620110  | 1.281466  | C           | -0.769790 | -2.847887 | -1.252137 |
| H | 1.099168  | 1.629990  | 2.279293  | H           | -1.123588 | 0.277983  | -1.058254 |
| H | 2.634270  | 1.654190  | 1.395835  | H           | -1.708823 | -0.775268 | 0.249215  |
| C | 1.073891  | 2.833199  | 0.496949  | H           | -0.303030 | -3.442468 | -2.042834 |
| C | -0.167639 | 2.837094  | -0.152234 | H           | -1.105171 | -3.511171 | -0.446287 |
| C | 1.871107  | 3.982045  | 0.446552  | N           | -3.658418 | -1.926472 | 0.147542  |
| C | -0.599356 | 3.976570  | -0.831555 | C           | -4.302246 | -0.747415 | 0.583434  |
| H | -0.781907 | 1.943172  | -0.145398 | C           | -4.455878 | 0.376337  | -0.254868 |
| C | 1.434989  | 5.124472  | -0.226542 | C           | -4.775318 | -0.703683 | 1.908863  |
| H | 2.841760  | 3.982424  | 0.937682  | C           | -5.082126 | 1.516758  | 0.235922  |
| C | 0.195739  | 5.124467  | -0.868225 | H           | -4.065253 | 0.377761  | -1.265250 |
| H | -1.561985 | 3.965904  | -1.335440 | C           | -5.404520 | 0.443145  | 2.375283  |
| H | 2.066184  | 6.008296  | -0.256997 | H           | -4.635984 | -1.576229 | 2.533607  |
| H | -0.144580 | 6.009429  | -1.398508 | C           | -5.564149 | 1.559652  | 1.547433  |
| C | 3.187204  | -0.704092 | -0.429148 | H           | -5.188589 | 2.381574  | -0.411806 |
| C | 3.991237  | -0.882542 | -1.562707 | H           | -5.774295 | 0.467452  | 3.396024  |

|   |           |           |           |           |           |           |           |
|---|-----------|-----------|-----------|-----------|-----------|-----------|-----------|
| H | -6.053493 | 2.453561  | 1.920466  | H         | 4.047399  | -2.408836 | -0.153954 |
| O | 2.080062  | -2.292084 | -1.638983 | C         | 5.921488  | 0.377221  | 1.790444  |
| C | 3.368738  | 0.053667  | -1.037871 | H         | 4.863117  | 1.749209  | 0.505738  |
| C | 1.406588  | 0.664025  | 0.346332  | C         | 6.139914  | -0.960136 | 2.119518  |
| H | 3.444064  | 1.117458  | -1.290298 | H         | 5.635651  | -3.009283 | 1.672364  |
| H | 3.571324  | -0.531775 | -1.935880 | H         | 6.439693  | 1.164462  | 2.330787  |
| H | 0.575995  | 0.151591  | 0.838805  | H         | 6.830686  | -1.219423 | 2.916791  |
| H | 2.158190  | 0.826866  | 1.131037  | C         | -1.890772 | -1.819712 | -1.635565 |
| N | 1.977266  | -0.216892 | -0.658793 | H         | -1.829021 | -1.556446 | -2.695855 |
| O | -3.421550 | -2.872337 | 0.973277  |           |           |           |           |
| C | -3.361187 | -2.172109 | -1.254724 | <b>4a</b> |           |           |           |
| H | -3.530202 | -3.239336 | -1.408581 | C         | 1.203531  | -3.674541 | -0.299536 |
| H | -4.059497 | -1.606881 | -1.872872 | C         | 0.077172  | -2.760685 | -0.860925 |
| C | 1.409047  | -1.425279 | -1.049180 | C         | 0.194566  | -2.022194 | 0.509924  |
| C | 0.943031  | 2.012906  | -0.183429 | C         | 0.646426  | -3.368512 | 1.116568  |
| C | 0.711105  | 2.227883  | -1.545663 | H         | 1.267613  | -4.714019 | -0.629864 |
| C | 0.715984  | 3.063125  | 0.714525  | H         | -0.882790 | -3.279014 | -0.914806 |
| C | 0.253645  | 3.466275  | -2.001837 | H         | 0.259960  | -2.191015 | -1.773403 |
| H | 0.897924  | 1.418214  | -2.244696 | H         | -0.208090 | -3.989424 | 1.386547  |
| C | 0.254056  | 4.298453  | 0.262822  | H         | 1.351112  | -3.297172 | 1.949086  |
| H | 0.902946  | 2.909908  | 1.775076  | C         | 2.541550  | -2.945046 | -0.481009 |
| C | 0.021089  | 4.504373  | -1.099501 | H         | 3.260453  | -3.249294 | 0.296891  |
| H | 0.082609  | 3.618996  | -3.063754 | H         | 2.971458  | -3.178912 | -1.460559 |
| H | 0.081560  | 5.102836  | 0.972202  | N         | 2.287676  | -1.498791 | -0.485473 |
| H | -0.333065 | 5.468137  | -1.453292 | O         | 1.319422  | -1.126008 | 0.544840  |
| C | 4.358252  | -0.294984 | 0.056755  | C         | 3.382523  | -0.611848 | -0.440014 |
| C | 4.580410  | -1.638411 | 0.395318  | C         | 3.189464  | 0.729060  | -0.066613 |
| C | 5.032319  | 0.706041  | 0.763490  | C         | 4.663553  | -1.026171 | -0.845404 |
| C | 5.466530  | -1.966336 | 1.419386  | C         | 4.248977  | 1.628456  | -0.108278 |

|   |           |           |           |           |           |           |           |
|---|-----------|-----------|-----------|-----------|-----------|-----------|-----------|
| H | 2.214924  | 1.057426  | 0.259190  | C         | 0.259701  | 2.193932  | 1.265521  |
| C | 5.712926  | -0.107291 | -0.894527 | C         | 0.340481  | 4.258005  | -0.606884 |
| H | 4.852305  | -2.054680 | -1.128430 | H         | -0.649348 | 2.880531  | -1.934536 |
| C | 5.519085  | 1.223019  | -0.526154 | C         | 0.828286  | 3.422515  | 1.604455  |
| H | 4.069197  | 2.658183  | 0.187930  | H         | 0.236816  | 1.381788  | 1.985228  |
| H | 6.693777  | -0.446829 | -1.215481 | C         | 0.874523  | 4.457060  | 0.667815  |
| H | 6.342280  | 1.929794  | -0.560405 | H         | 0.366303  | 5.059428  | -1.339550 |
| C | -1.054936 | -1.364041 | 1.095547  | H         | 1.239004  | 3.568924  | 2.599176  |
| O | -1.732407 | -2.017154 | 1.889622  | H         | 1.317867  | 5.412933  | 0.930716  |
| N | -1.414222 | -0.110776 | 0.684688  |           |           |           |           |
| C | -0.818729 | 0.630217  | -0.425049 | <b>Im</b> |           |           |           |
| H | -1.583806 | 0.765519  | -1.200398 | C         | -0.054066 | 1.836179  | 0.044752  |
| H | -0.014339 | 0.041294  | -0.862635 | C         | 1.367110  | 1.519153  | 0.539363  |
| C | -2.667022 | 0.453997  | 1.220382  | C         | -0.743158 | 0.944282  | -0.916422 |
| H | -2.846261 | -0.022725 | 2.184217  | O         | -0.264648 | 0.761594  | -2.037609 |
| H | -2.504406 | 1.523032  | 1.384020  | C         | 1.113063  | 2.705963  | -0.330627 |
| C | -3.835144 | 0.230848  | 0.283221  | H         | 1.169677  | 3.703762  | 0.110405  |
| C | -4.405149 | -1.045447 | 0.165737  | H         | 1.438512  | 2.642454  | -1.364921 |
| C | -4.328947 | 1.273132  | -0.508545 | C         | 0.248147  | 1.703310  | 1.516209  |
| C | -5.453920 | -1.267120 | -0.724908 | H         | -0.097257 | 0.797493  | 2.012237  |
| H | -4.011958 | -1.851933 | 0.777341  | H         | 0.208909  | 2.598398  | 2.142403  |
| C | -5.380254 | 1.051187  | -1.401611 | C         | 2.170674  | 0.305818  | 0.320397  |
| H | -3.887386 | 2.263444  | -0.423408 | C         | 2.525121  | -0.492827 | 1.418251  |
| C | -5.944733 | -0.219628 | -1.510422 | C         | 2.581238  | -0.086041 | -0.965199 |
| H | -5.893200 | -2.257485 | -0.805535 | C         | 3.270730  | -1.658032 | 1.239542  |
| H | -5.756200 | 1.869392  | -2.009259 | H         | 2.222133  | -0.189040 | 2.416053  |
| H | -6.763632 | -0.394754 | -2.202216 | C         | 3.324575  | -1.250891 | -1.138698 |
| C | -0.269584 | 1.984886  | -0.013112 | H         | 2.278236  | 0.498837  | -1.825456 |
| C | -0.233005 | 3.030851  | -0.941189 | C         | 3.674549  | -2.040593 | -0.039952 |

|                |           |           |           |   |           |           |           |
|----------------|-----------|-----------|-----------|---|-----------|-----------|-----------|
| H              | 3.539437  | -2.262851 | 2.100937  | C | 5.154060  | 1.812843  | 0.218169  |
| H              | 3.626903  | -1.547703 | -2.138857 | H | 4.997308  | 0.505298  | -1.507116 |
| H              | 4.256953  | -2.946304 | -0.181301 | C | 3.560862  | 1.391612  | 1.981578  |
| C              | -2.755690 | 0.697924  | 0.596124  | H | 2.177870  | -0.211876 | 1.660587  |
| C              | -2.455308 | -0.752917 | -1.338581 | C | 4.630590  | 2.132492  | 1.474183  |
| C              | -3.170611 | -0.528730 | 1.409538  | H | 5.985455  | 2.382978  | -0.185335 |
| H              | -3.658230 | 1.154458  | 0.162677  | H | 3.141866  | 1.634367  | 2.953529  |
| H              | -2.270285 | 1.442343  | 1.224778  | H | 5.049487  | 2.951352  | 2.050526  |
| C              | -2.882731 | -1.928154 | -0.460244 | O | -2.857915 | -1.057552 | -1.809445 |
| H              | -3.330403 | -0.348019 | -1.867049 | O | 3.422810  | -1.124559 | -2.043755 |
| H              | -1.714056 | -1.054384 | -2.079295 | C | 2.040964  | -1.859925 | -0.360042 |
| H              | -3.917941 | -0.258416 | 2.161353  | H | 1.983590  | -2.771578 | -0.943357 |
| H              | -2.285839 | -0.943648 | 1.922134  | H | 2.023792  | -2.002967 | 0.713604  |
| H              | -3.424607 | -2.673220 | -1.049498 | N | 3.032792  | -1.039471 | -0.818836 |
| H              | -1.987153 | -2.403075 | -0.027043 | C | 0.339509  | -1.139398 | -0.697772 |
| N              | -1.866391 | 0.278202  | -0.484929 | C | -2.142477 | -0.069629 | -1.601231 |
| O              | -3.769366 | -1.512238 | 0.576137  | C | -2.105678 | 2.424717  | -1.142274 |
|                |           |           |           | C | -3.995396 | 1.055938  | -0.453146 |
| <b>TS4A-1m</b> |           |           |           | C | -2.144660 | 3.118238  | 0.221266  |
| C              | -0.700806 | -0.116558 | -1.870836 | H | -2.731154 | 2.997560  | -1.844249 |
| C              | 0.376531  | 0.373796  | -0.949393 | H | -1.094464 | 2.398925  | -1.547905 |
| C              | -0.065210 | -1.435202 | -2.164560 | C | -3.967462 | 1.783310  | 0.891345  |
| H              | 0.105002  | 1.043106  | -0.134961 | H | -4.699330 | 1.558285  | -1.133187 |
| H              | 1.308307  | 0.690464  | -1.426519 | H | -4.306020 | 0.016711  | -0.340172 |
| H              | -0.745955 | -2.260804 | -2.363546 | H | -1.849196 | 4.167922  | 0.132053  |
| H              | 0.797499  | -1.420248 | -2.831000 | H | -1.446752 | 2.611679  | 0.910456  |
| C              | 3.549679  | 0.023514  | -0.010152 | H | -4.975879 | 1.879846  | 1.303689  |
| C              | 4.618871  | 0.768144  | -0.527999 | H | -3.346799 | 1.206482  | 1.596851  |
| C              | 3.015498  | 0.338593  | 1.250790  | N | -2.646655 | 1.076724  | -1.008926 |

|                 |           |           |           |   |           |           |           |
|-----------------|-----------|-----------|-----------|---|-----------|-----------|-----------|
| O               | -3.460598 | 3.110545  | 0.757443  | C | -3.306487 | 1.036882  | -1.017631 |
| C               | -0.527710 | -1.645550 | 0.417853  | C | -3.907288 | 3.386400  | 0.377816  |
| C               | -0.656566 | -0.918196 | 1.612790  | H | -1.818255 | 3.398848  | 0.940059  |
| C               | -1.175447 | -2.884720 | 0.319306  | C | -4.599081 | 1.548296  | -1.027305 |
| C               | -1.433804 | -1.401608 | 2.664519  | H | -3.106038 | 0.093874  | -1.509402 |
| H               | -0.155704 | 0.038413  | 1.720446  | C | -4.910888 | 2.722494  | -0.336285 |
| C               | -1.950593 | -3.369806 | 1.371621  | H | -4.139512 | 4.297405  | 0.921337  |
| H               | -1.085366 | -3.467725 | -0.590071 | H | -5.373748 | 1.011329  | -1.566055 |
| C               | -2.086985 | -2.629871 | 2.546713  | H | -5.924364 | 3.110670  | -0.346882 |
| H               | -1.527113 | -0.818279 | 3.576032  | C | 3.171074  | -1.274867 | -0.088571 |
| H               | -2.453805 | -4.326496 | 1.268933  | O | 3.750085  | -2.088245 | -0.830278 |
| H               | -2.692596 | -3.008060 | 3.364720  | C | 3.377399  | 1.033458  | 0.882462  |
|                 |           |           |           | C | 5.337551  | -0.365964 | 0.555921  |
| <b>INT4A-1m</b> |           |           |           | C | 3.940676  | 1.978801  | -0.186807 |
| C               | -0.344936 | -1.156127 | -0.158109 | H | 3.703894  | 1.367625  | 1.874834  |
| C               | 0.671587  | -0.896768 | 0.998438  | H | 2.291299  | 1.070708  | 0.842428  |
| C               | 1.741314  | -1.369949 | 0.076710  | C | 5.822789  | 0.611642  | -0.516458 |
| C               | 0.774680  | -2.049401 | -0.826733 | H | 5.752416  | -0.070407 | 1.527489  |
| H               | 0.500563  | -1.565825 | 1.853425  | H | 5.645569  | -1.384568 | 0.318999  |
| H               | 0.673705  | 0.137324  | 1.386421  | H | 3.666279  | 3.014313  | 0.036110  |
| H               | 0.584499  | -3.090520 | -0.528890 | H | 3.509129  | 1.705318  | -1.165734 |
| H               | 0.949358  | -2.025388 | -1.907227 | H | 6.915471  | 0.663309  | -0.537061 |
| C               | -0.466334 | 0.135113  | -1.020158 | H | 5.463463  | 0.271231  | -1.500430 |
| H               | 0.560510  | 0.407297  | -1.314500 | N | 3.876612  | -0.328567 | 0.657404  |
| H               | -1.074477 | -0.048039 | -1.906554 | O | 5.359182  | 1.932100  | -0.241952 |
| N               | -0.970756 | 1.261477  | -0.272686 | C | -1.694915 | -1.744391 | 0.159390  |
| O               | -0.134762 | 1.766144  | 0.573881  | C | -2.313767 | -2.632006 | -0.730346 |
| C               | -2.294442 | 1.717283  | -0.308663 | C | -2.395581 | -1.332110 | 1.299802  |
| C               | -2.608519 | 2.896631  | 0.397452  | C | -3.607293 | -3.095714 | -0.487541 |



|                |           |           |           |   |           |           |           |
|----------------|-----------|-----------|-----------|---|-----------|-----------|-----------|
| H              | -1.779017 | -2.960145 | -1.618141 | C | 0.222154  | -0.448986 | 0.821337  |
| C              | -3.689192 | -1.792649 | 1.543727  | O | 0.438003  | -0.540711 | 2.035783  |
| H              | -1.930818 | -0.630440 | 1.986619  | C | 0.276650  | -1.715479 | -0.004785 |
| C              | -4.299181 | -2.674690 | 0.650047  | C | -1.540583 | -2.457633 | -0.004209 |
| H              | -4.073248 | -3.786659 | -1.184172 | H | -1.269538 | -3.342253 | -0.570017 |
| H              | -4.222488 | -1.457857 | 2.428451  | H | -1.737308 | -2.590358 | 1.052990  |
| H              | -5.306226 | -3.033949 | 0.839688  | C | 3.051149  | -0.995919 | -0.117837 |
|                |           |           |           | C | 3.513402  | -0.142100 | -1.145649 |
| <b>TS4B-1m</b> |           |           |           | C | 3.609930  | -0.848814 | 1.171532  |
| C              | 2.013500  | -1.963794 | -0.391378 | C | 4.475720  | 0.828443  | -0.889477 |
| C              | 1.226756  | -2.763621 | 0.585125  | H | 3.119454  | -0.255261 | -2.150469 |
| C              | 0.922495  | -1.799371 | -1.397932 | C | 4.567683  | 0.127493  | 1.421018  |
| H              | 1.447120  | -2.680273 | 1.645570  | H | 3.268143  | -1.484167 | 1.979849  |
| H              | 0.976664  | -3.785725 | 0.277246  | C | 5.004512  | 0.973744  | 0.396770  |
| H              | 0.943082  | -0.921549 | -2.035447 | H | 4.815888  | 1.473246  | -1.694410 |
| H              | 0.613803  | -2.690069 | -1.952616 | H | 4.974562  | 0.233486  | 2.422332  |
| N              | -2.366062 | -1.637842 | -0.683360 | H | 5.753926  | 1.733284  | 0.597058  |
| O              | -2.288630 | -1.607254 | -1.981390 | C | -0.620239 | 1.029823  | -1.088530 |
| C              | -3.184011 | -0.653980 | -0.034349 | C | 0.137272  | 1.975395  | 1.013901  |
| C              | -4.157775 | -0.020590 | -0.816329 | C | 0.273029  | 2.021703  | -1.831374 |
| C              | -3.011921 | -0.294174 | 1.311382  | H | -1.600828 | 1.495916  | -0.927040 |
| C              | -4.975207 | 0.950820  | -0.244839 | H | -0.801794 | 0.120408  | -1.657342 |
| H              | -4.241141 | -0.305926 | -1.857045 | C | 1.006210  | 2.943449  | 0.208559  |
| C              | -3.831663 | 0.687761  | 1.863856  | H | -0.846298 | 2.421549  | 1.214480  |
| H              | -2.217680 | -0.718575 | 1.914124  | H | 0.608524  | 1.716906  | 1.961697  |
| C              | -4.818886 | 1.310294  | 1.095796  | H | -0.190607 | 2.317283  | -2.777005 |
| H              | -5.734087 | 1.433507  | -0.853405 | H | 1.251250  | 1.558743  | -2.042996 |
| H              | -3.684778 | 0.974610  | 2.900700  | H | 1.083018  | 3.906577  | 0.721754  |
| H              | -5.451044 | 2.075434  | 1.535544  | H | 2.015981  | 2.514770  | 0.103871  |

|                 |           |           |           |                          |           |           |           |
|-----------------|-----------|-----------|-----------|--------------------------|-----------|-----------|-----------|
| N               | -0.038076 | 0.751850  | 0.227941  | H                        | -1.263103 | -1.583307 | -0.921273 |
| O               | 0.447077  | 3.214665  | -1.074020 | C                        | 2.426309  | 2.727508  | -0.230543 |
|                 |           |           |           | C                        | 1.372621  | 1.270300  | 1.456732  |
| <b>INT4B-1m</b> |           |           |           | C                        | 3.781049  | 2.269972  | 0.299536  |
| C               | -2.733014 | 0.546305  | -0.202941 | H                        | 2.150170  | 3.669772  | 0.263003  |
| C               | -1.955798 | 0.859160  | -1.442348 | H                        | 2.448205  | 2.883751  | -1.308874 |
| C               | -1.516908 | 0.555983  | 0.661359  | C                        | 2.792048  | 0.929113  | 1.927308  |
| H               | -1.898694 | 1.931939  | -1.666010 | H                        | 0.964520  | 2.069655  | 2.091915  |
| H               | -2.192586 | 0.333238  | -2.373007 | H                        | 0.761835  | 0.375545  | 1.568002  |
| H               | -1.358686 | 1.501144  | 1.197750  | H                        | 4.523722  | 3.063145  | 0.173129  |
| H               | -1.365740 | -0.275117 | 1.367746  | H                        | 4.115217  | 1.376672  | -0.252030 |
| N               | 0.588949  | -1.611247 | -0.049477 | H                        | 2.781518  | 0.749180  | 3.006085  |
| O               | 0.075284  | -1.866027 | 1.121788  | H                        | 3.135764  | 0.015209  | 1.424746  |
| C               | 1.953081  | -1.771143 | -0.275461 | N                        | 1.394388  | 1.724659  | 0.061605  |
| C               | 2.704739  | -2.491032 | 0.679609  | O                        | 3.705052  | 1.993277  | 1.693145  |
| C               | 2.606794  | -1.219285 | -1.400928 | C                        | -4.059236 | 0.146970  | 0.021497  |
| C               | 4.071679  | -2.658338 | 0.501630  | C                        | -5.018118 | 0.147315  | -1.034475 |
| H               | 2.185007  | -2.895985 | 1.538205  | C                        | -4.496153 | -0.257545 | 1.317543  |
| C               | 3.976480  | -1.403535 | -1.557585 | C                        | -6.329142 | -0.232161 | -0.800243 |
| H               | 2.070965  | -0.603892 | -2.113609 | H                        | -4.708326 | 0.456787  | -2.028176 |
| C               | 4.721075  | -2.120784 | -0.615517 | C                        | -5.811336 | -0.632628 | 1.535821  |
| H               | 4.638404  | -3.215044 | 1.242371  | H                        | -3.779136 | -0.276115 | 2.132440  |
| H               | 4.469632  | -0.965519 | -2.420484 | C                        | -6.737655 | -0.624514 | 0.482963  |
| H               | 5.790313  | -2.251999 | -0.746138 | H                        | -7.045857 | -0.224751 | -1.616351 |
| C               | 0.533465  | 1.366804  | -0.936119 | H                        | -6.125381 | -0.940023 | 2.529054  |
| O               | 0.689099  | 1.735520  | -2.103855 | H                        | -7.766515 | -0.921656 | 0.659939  |
| C               | -0.661333 | 0.454471  | -0.647371 |                          |           |           |           |
| C               | -0.325989 | -1.012384 | -0.992449 | <b>TS4B-1m-concerted</b> |           |           |           |
| H               | 0.061940  | -1.071974 | -2.010055 | C                        | -0.959388 | -1.532877 | 0.763719  |

|   |           |           |           |                |           |           |           |
|---|-----------|-----------|-----------|----------------|-----------|-----------|-----------|
| C | -0.493204 | -0.479337 | 1.736446  | H              | 3.884823  | 1.693170  | 0.467682  |
| C | 0.807307  | -0.723102 | 0.998403  | C              | 4.528469  | -1.803899 | -0.895136 |
| C | 0.405719  | -2.076890 | 0.427439  | H              | 4.145657  | -1.924010 | 1.221495  |
| H | -0.525580 | -0.756638 | 2.807170  | H              | 2.753232  | -2.324370 | 0.202498  |
| H | -0.957382 | 0.510294  | 1.630544  | H              | 6.077394  | 1.064452  | -0.684830 |
| H | 0.709418  | -2.988973 | 0.980389  | H              | 4.635760  | 0.711602  | -1.675879 |
| H | 0.581982  | -2.264530 | -0.645490 | H              | 4.949550  | -2.813394 | -0.923702 |
| N | -0.632260 | 0.931948  | -1.130198 | H              | 3.953004  | -1.634742 | -1.821847 |
| C | -1.218253 | 2.177741  | -0.664235 | N              | 3.146278  | -0.257019 | 0.390486  |
| C | -0.548928 | 2.986637  | 0.256719  | O              | 5.627227  | -0.906833 | -0.824664 |
| C | -2.482295 | 2.507596  | -1.152240 | C              | -2.261365 | -1.965767 | 0.387444  |
| C | -1.160288 | 4.173608  | 0.663111  | C              | -3.407415 | -1.333836 | 0.923726  |
| H | 0.390863  | 2.660557  | 0.694974  | C              | -2.431967 | -3.063717 | -0.485743 |
| C | -3.074643 | 3.698370  | -0.738087 | C              | -4.676317 | -1.791106 | 0.599960  |
| H | -2.976294 | 1.823721  | -1.831893 | H              | -3.279585 | -0.482122 | 1.583962  |
| C | -2.413183 | 4.536197  | 0.164105  | C              | -3.706121 | -3.514611 | -0.805762 |
| H | -0.658844 | 4.805498  | 1.389680  | H              | -1.556199 | -3.548478 | -0.905050 |
| H | -4.054654 | 3.970503  | -1.118083 | C              | -4.831072 | -2.882259 | -0.264922 |
| H | -2.880569 | 5.460966  | 0.488883  | H              | -5.551456 | -1.301376 | 1.016501  |
| C | 1.959151  | 0.139243  | 1.030637  | H              | -3.829259 | -4.359744 | -1.476434 |
| O | 1.899738  | 1.261578  | 1.574510  | H              | -5.825884 | -3.239033 | -0.514678 |
| C | 0.658569  | 0.794236  | -1.292337 |                |           |           |           |
| H | 1.012404  | -0.145545 | -1.685150 | <b>TS5B-1m</b> |           |           |           |
| H | 1.313195  | 1.636974  | -1.137349 | C              | 2.395098  | -0.751183 | -0.011759 |
| O | -1.430156 | -0.069007 | -1.276716 | C              | 1.762101  | -1.517356 | -1.145653 |
| C | 4.273282  | 0.674292  | 0.452204  | C              | 0.428625  | -0.794181 | -0.745371 |
| C | 3.597047  | -1.645817 | 0.306630  | C              | 1.080167  | -0.479516 | 0.647385  |
| C | 5.179221  | 0.443826  | -0.753590 | H              | 1.745012  | -2.606439 | -0.996373 |
| H | 4.849882  | 0.523636  | 1.378601  | H              | 2.110295  | -1.328603 | -2.168555 |

|   |           |           |           |           |           |           |           |
|---|-----------|-----------|-----------|-----------|-----------|-----------|-----------|
| H | 0.824746  | -1.258133 | 1.381537  | N         | -1.711686 | -1.842377 | 0.123500  |
| H | 0.897063  | 0.500127  | 1.089869  | C         | 3.710072  | -0.362708 | 0.251303  |
| N | -0.020082 | 1.669283  | -0.890156 | C         | 4.037941  | 0.435516  | 1.389794  |
| C | -1.310627 | 2.084384  | -0.588893 | C         | 4.776051  | -0.763846 | -0.610779 |
| C | -2.452572 | 1.421798  | -1.098372 | C         | 5.348569  | 0.791847  | 1.648388  |
| C | -1.480048 | 3.222092  | 0.234701  | H         | 3.238737  | 0.770221  | 2.043417  |
| C | -3.721337 | 1.901535  | -0.789553 | C         | 6.083240  | -0.398599 | -0.336327 |
| H | -2.357353 | 0.544960  | -1.726770 | H         | 4.548414  | -1.365577 | -1.485295 |
| C | -2.756333 | 3.669487  | 0.540208  | C         | 6.382028  | 0.379033  | 0.791638  |
| H | -0.592120 | 3.719659  | 0.602753  | H         | 5.579663  | 1.401139  | 2.517271  |
| C | -3.889618 | 3.019737  | 0.032417  | H         | 6.881828  | -0.714604 | -1.001272 |
| H | -4.589573 | 1.389334  | -1.194347 | H         | 7.408093  | 0.666062  | 0.998939  |
| H | -2.873322 | 4.541549  | 1.177289  | O         | 1.016986  | 2.348193  | -0.520465 |
| H | -4.884600 | 3.382105  | 0.269059  | C         | 0.282282  | 0.464365  | -1.653089 |
| C | -0.797972 | -1.699652 | -0.890470 | H         | -0.456364 | 0.271839  | -2.432807 |
| O | -0.901219 | -2.323315 | -1.947572 | H         | 1.228611  | 0.689639  | -2.142334 |
| C | -2.656777 | -2.964450 | 0.052210  |           |           |           |           |
| C | -1.792059 | -1.062232 | 1.361724  | <b>Si</b> |           |           |           |
| C | -4.061902 | -2.515674 | 0.434729  | C         | -0.942550 | -1.146305 | -0.361167 |
| H | -2.330624 | -3.743852 | 0.755565  | C         | 0.337234  | -0.915068 | 0.488859  |
| H | -2.627299 | -3.366084 | -0.960589 | C         | 0.886777  | -0.176243 | -0.781159 |
| C | -3.251405 | -0.741581 | 1.705832  | C         | -0.035231 | -1.105089 | -1.614071 |
| H | -1.346748 | -1.630077 | 2.190767  | H         | 0.856594  | -1.861980 | 0.653545  |
| H | -1.258216 | -0.120459 | 1.246578  | H         | 0.220298  | -0.369933 | 1.426300  |
| H | -4.732780 | -3.377725 | 0.489416  | H         | 0.469612  | -2.047946 | -1.828402 |
| H | -4.450323 | -1.814430 | -0.322530 | H         | -0.484463 | -0.700211 | -2.523426 |
| H | -3.299004 | -0.306725 | 2.708269  | N         | -0.953987 | 1.221744  | -0.047002 |
| H | -3.645508 | -0.009594 | 0.988959  | C         | -1.785669 | 2.357071  | -0.024295 |
| O | -4.064444 | -1.906825 | 1.720211  | C         | -1.264948 | 3.637751  | -0.279924 |

|   |           |           |           |   |           |           |           |
|---|-----------|-----------|-----------|---|-----------|-----------|-----------|
| C | -3.140687 | 2.231661  | 0.333791  | H | -1.135822 | -3.592503 | -1.601108 |
| C | -2.078765 | 4.763395  | -0.151528 | C | -3.597237 | -3.232873 | 1.368480  |
| H | -0.231317 | 3.767178  | -0.578325 | H | -2.812092 | -1.233970 | 1.569712  |
| C | -3.940297 | 3.364835  | 0.443986  | C | -3.541377 | -4.429969 | 0.649528  |
| H | -3.552935 | 1.246805  | 0.508539  | H | -2.607425 | -5.478245 | -0.985937 |
| C | -3.419501 | 4.639783  | 0.209142  | H | -4.291388 | -3.127741 | 2.197331  |
| H | -1.655429 | 5.744003  | -0.350033 | H | -4.190488 | -5.258354 | 0.917813  |
| H | -4.985307 | 3.247001  | 0.716857  | O | -1.749381 | 0.056822  | -0.378900 |
| H | -4.049654 | 5.518883  | 0.299311  | C | 0.287614  | 1.246984  | -0.821748 |
| C | 2.363429  | -0.230132 | -1.158075 | H | 0.142422  | 1.562706  | -1.866811 |
| O | 2.703115  | -0.785617 | -2.200254 |   |           |           |           |
| C | 4.705246  | 0.281112  | -0.647927 |   |           |           |           |
| C | 3.039729  | 0.866729  | 1.029498  |   |           |           |           |
| C | 5.412727  | -0.566356 | 0.409559  |   |           |           |           |
| H | 5.131431  | 1.292537  | -0.650891 |   |           |           |           |
| H | 4.805300  | -0.156587 | -1.641080 |   |           |           |           |
| C | 3.807993  | -0.000059 | 2.033155  |   |           |           |           |
| H | 3.404286  | 1.900493  | 1.097300  |   |           |           |           |
| H | 1.979366  | 0.865865  | 1.270679  |   |           |           |           |
| H | 6.495025  | -0.561358 | 0.252665  |   |           |           |           |
| H | 5.051084  | -1.605739 | 0.344287  |   |           |           |           |
| H | 3.727815  | 0.417421  | 3.041276  |   |           |           |           |
| H | 3.375985  | -1.015544 | 2.036238  |   |           |           |           |
| O | 5.191548  | -0.046777 | 1.718849  |   |           |           |           |
| N | 3.278042  | 0.373509  | -0.326818 |   |           |           |           |
| C | -1.865184 | -2.289712 | -0.045415 |   |           |           |           |
| C | -1.818618 | -3.488056 | -0.764091 |   |           |           |           |
| C | -2.765896 | -2.170025 | 1.022737  |   |           |           |           |
| C | -2.651559 | -4.553915 | -0.417338 |   |           |           |           |

## 10. Crystallographic data for compound 4a and 5i

Date of **4a** and **5i**: Details of the X-ray experiments and crystal data are summarized below. CCDC 2365302 and CCDC 2365303 contains the supplementary crystallographic data, and can be obtained free of charge via [www.ccdc.cam.ac.uk/conts/retrieving.html](http://www.ccdc.cam.ac.uk/conts/retrieving.html).

**Table S3. Crystal data and structure refinement for 4a.**

|                                    |                                                               |
|------------------------------------|---------------------------------------------------------------|
| Identification code                | mo_230612_ZY_5_80_0m                                          |
| Empirical formula                  | C <sub>26</sub> H <sub>26</sub> N <sub>2</sub> O <sub>2</sub> |
| Formula weight                     | 398.49                                                        |
| Temperature/K                      | 170.00                                                        |
| Crystal system                     | monoclinic                                                    |
| Space group                        | P2 <sub>1</sub> /n                                            |
| a/Å                                | 7.8217(3)                                                     |
| b/Å                                | 28.8712(10)                                                   |
| c/Å                                | 10.0160(3)                                                    |
| α/°                                | 90                                                            |
| β/°                                | 109.4000(10)                                                  |
| γ/°                                | 90                                                            |
| Volume/Å <sup>3</sup>              | 2133.41(13)                                                   |
| Z                                  | 4                                                             |
| ρ <sub>calc</sub> /cm <sup>3</sup> | 1.241                                                         |
| μ/mm <sup>-1</sup>                 | 0.079                                                         |
| F(000)                             | 848.0                                                         |
| Crystal size/mm <sup>3</sup>       | 0.42 × 0.25 × 0.23                                            |
| Radiation                          | MoKα (λ = 0.71073)                                            |
| 2θ range for data collection/°     | 4.536 to 54.99                                                |
| Index ranges                       | -10 ≤ h ≤ 10, -37 ≤ k ≤ 37, -12 ≤ l ≤ 13                      |
| Reflections collected              | 30701                                                         |
| Independent reflections            | 4889 [R <sub>int</sub> = 0.0407, R <sub>sigma</sub> = 0.0265] |
| Data/restraints/parameters         | 4889/21/281                                                   |
| Goodness-of-fit on F <sup>2</sup>  | 1.061                                                         |
| Final R indexes [I ≥ 2σ (I)]       | R <sub>1</sub> = 0.0458, wR <sub>2</sub> = 0.1005             |

Final R indexes [all data]  $R_1 = 0.0602$ ,  $wR_2 = 0.1108$

Largest diff. peak/hole /  $e \text{ \AA}^{-3}$  0.18/-0.18

**Table S4. Crystal data and structure refinement for 5i.**

|                                                |                                                                    |
|------------------------------------------------|--------------------------------------------------------------------|
| Identification code                            | 240325_ZY_6_142                                                    |
| Empirical formula                              | $C_{22}H_{24}N_2O_3$                                               |
| Formula weight                                 | 364.43                                                             |
| Temperature/K                                  | 170.00                                                             |
| Crystal system                                 | orthorhombic                                                       |
| Space group                                    | $Pna2_1$                                                           |
| a/ $\text{\AA}$                                | 11.2419(4)                                                         |
| b/ $\text{\AA}$                                | 12.3869(5)                                                         |
| c/ $\text{\AA}$                                | 13.4125(6)                                                         |
| $\alpha/^\circ$                                | 90                                                                 |
| $\beta/^\circ$                                 | 90                                                                 |
| $\gamma/^\circ$                                | 90                                                                 |
| Volume/ $\text{\AA}^3$                         | 1867.72(13)                                                        |
| Z                                              | 4                                                                  |
| $\rho_{\text{calc}}/\text{cm}^3$               | 1.296                                                              |
| $\mu/\text{mm}^{-1}$                           | 0.443                                                              |
| F(000)                                         | 776.0                                                              |
| Crystal size/ $\text{mm}^3$                    | $0.1 \times 0.06 \times 0.04$                                      |
| Radiation                                      | $\text{GaK}\alpha$ ( $\lambda = 1.34139$ )                         |
| 2 $\Theta$ range for data collection/ $^\circ$ | 8.454 to 121.32                                                    |
| Index ranges                                   | $-14 \leq h \leq 14$ , $-16 \leq k \leq 16$ , $-17 \leq l \leq 17$ |
| Reflections collected                          | 61419                                                              |
| Independent reflections                        | 4289 [ $R_{\text{int}} = 0.0405$ , $R_{\text{sigma}} = 0.0234$ ]   |
| Data/restraints/parameters                     | 4289/22/254                                                        |
| Goodness-of-fit on $F^2$                       | 1.064                                                              |
| Final R indexes [ $I \geq 2\sigma(I)$ ]        | $R_1 = 0.0305$ , $wR_2 = 0.0776$                                   |
| Final R indexes [all data]                     | $R_1 = 0.0330$ , $wR_2 = 0.0790$                                   |
| Largest diff. peak/hole / $e \text{ \AA}^{-3}$ | 0.14/-0.19                                                         |
| Flack parameter                                | -0.01(4)                                                           |

## 11. References

- [1] a) Y. Liang, R. Kleinmans, C. G. Daniliuc, F. Glorius, *J. Am. Chem. Soc.* **2022**, *144*, 20207-20213; b) N. Radhoff, C. G. Daniliuc, A. Studer, *Angew Chem Int Ed Engl* **2023**, *62*, e202304771; c) T. Yu, J. Yang, Z. Wang, Z. Ding, M. Xu, J. Wen, L. Xu, P. Li, *J. Am. Chem. Soc.* **2023**; d) T. V. T. Nguyen, A. Bossonnet, M. D. Wodrich, J. Waser, *J. Am. Chem. Soc.* **2023**, *145*, 25411-25421.
- [2] a) Z. Yan, X. Xie, Q. Song, F. Ma, X. Sui, Z. Huo, M. Ma, *Green Chem.* **2020**, *22*, 1301-1307; b) I. Nakamura, T. Jo, Y. Ishida, H. Tashiro, M. Terada, *Org. Lett.* **2017**, *19*, 3059-3062.
- [3] Gaussian 09, Revision E.01, Frisch, M. J. Trucks, G. W., Schlegel, H. B., Scuseria, G. E., Robb, M. A., Cheeseman, J. R., Scalmani, G., Barone, V., Mennucci, B., Petersson, G. A., Nakatsuji, H., Caricato, M.; Li, X., Hratchian, H. P., Izmaylov, A. F., Bloino, J., Zheng, G., Sonnenberg, J. L., Hada, M., Ehara, M., Toyota, K., Fukuda, R., Hasegawa, J., Ishida, M., Nakajima, T., Honda, Y., Kitao, O., Nakai, H., Vreven, T., Montgomery, J. A., Peralta, Jr., J. E., Ogliaro, F., Bearpark, M., Heyd, J. J., Brothers, E., Kudin, K. N., Staroverov, V. N., Keith, T., Kobayashi, R., Normand, J., Raghavachari, K., Rendell, A., Burant, J. C., Iyengar, S. S., Tomasi, J., Cossi, M., Rega, N., Millam, J. M., Klene, M., Knox, J. E., Cross, J. B., Bakken, V., Adamo, C., Jaramillo, J., Gomperts, R., Stratmann, R. E., Yazyev, O., Austin, A. J., Cammi, R., Pomelli, C., Ochterski, J. W., Martin, R. L., Morokuma, K., Zakrzewski, V. G., Voth, G. A., Salvador, P., Dannenberg, J. J., Dapprich, S., Daniels, A. D., Farkas, O., Foresman, J. B., Ortiz, J. V., Cioslowski, J. & Fox, D. J. Gaussian, Inc., Wallingford CT, **2013**.
- [4] a) Becke, A. D. *J. Chem. Phys.* **1993**, *98*, 5648. b) Lee, C.; Yang, W.; Parr, R. G. *Phys. Rev. B*, **1988**, *37*, 785.
- [5] Grimme, S.; Antony, J.; Ehrlich, S.; Krieg, H. *J. Chem. Phys.* **2010**, *132*, 154104.
- [6] Marenich, A. V.; Cramer, C. J.; Truhlar, D. G. *J. Phys. Chem. B* **2009**, *113*, 6378.
- [7] a) Clark, T.; Chandrasekhar, J.; Spitznagel, G. W.; Von R. Schleyer, P. *J. Comput. Chem.* **1983**, *4*, 294. b) Krishnan, R.; Binkley, J. S.; Seeger, R.; J Pople, . A. *J. Chem. Phys.* **1980**, *72*, 650.
- [8] a) Ditchfield, R.; Hehre, W. J.; Pople, J. A. *J. Chem. Phys.* **1971**, *54*, 724. b) Hehre, W. J.; Ditchfield, R.; Pople, J. A. *J. Chem. Phys.* **1972**, *56*, 2257. c) Hariharan, P. C.; Pople, J. A. *Theor. Chem. Acc.* **1973**, *28*, 213.
- [9] a) Deubel, D. V.; Lau, J. K. C. *Chem. Commun.* **2006**, 2451. b) Deubel, D. V. *J. Am. Chem. Soc.* **2008**, *130*, 665. c) Lau, J. K. C.; Deubel, D. V. *J. Chem. Theory Comput.* **2006**, *2*, 103. d) Plata, R. E.; Singleton, D. A. *J. Am. Chem. Soc.* **2015**, *137*, 3811. e) Kua, J.; Krizner, H. E.; De Haan, D. O. *J. Phys. Chem. A* **2011**, *115*, 1667.
- [10] Legault, C. Y. CYL View, version 1.0 b; Universite de Sherbrooke, Sherbrooke, Quebec, Canada, **2009**; <http://www.cylview.org>.



## 12. Copies of $^1\text{H}$ , $^{13}\text{C}$ NMR, and $^{19}\text{F}$ NMR spectra of compounds

### *N,N*-dibenzyl-3-phenyl-2-oxa-3-azabicyclo[3.1.1]heptane-1-carboxamide.(4a)

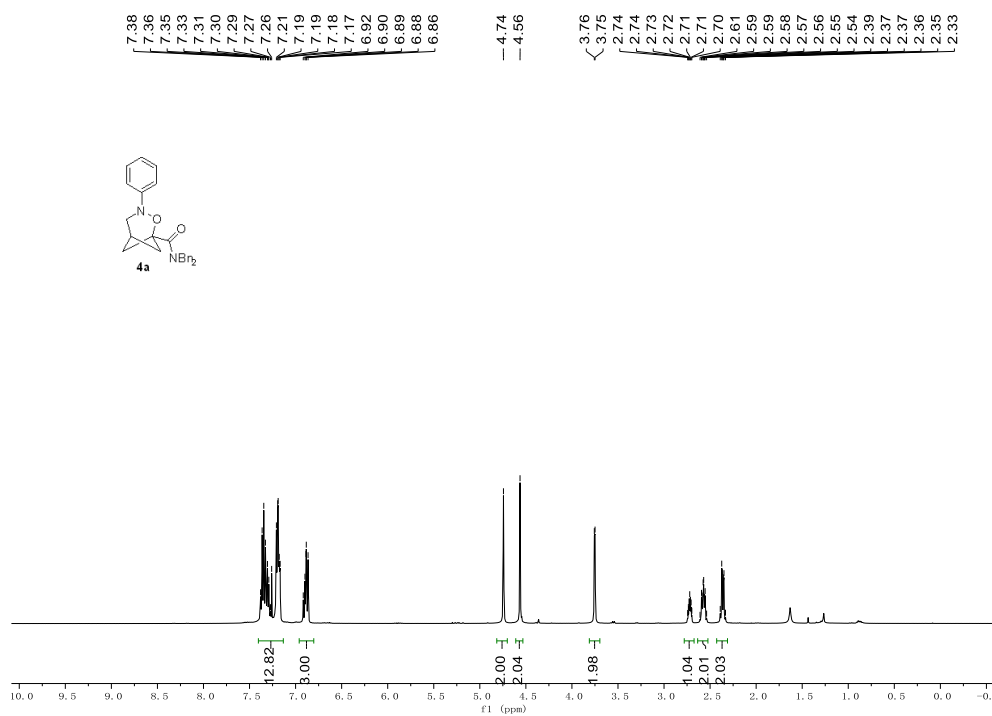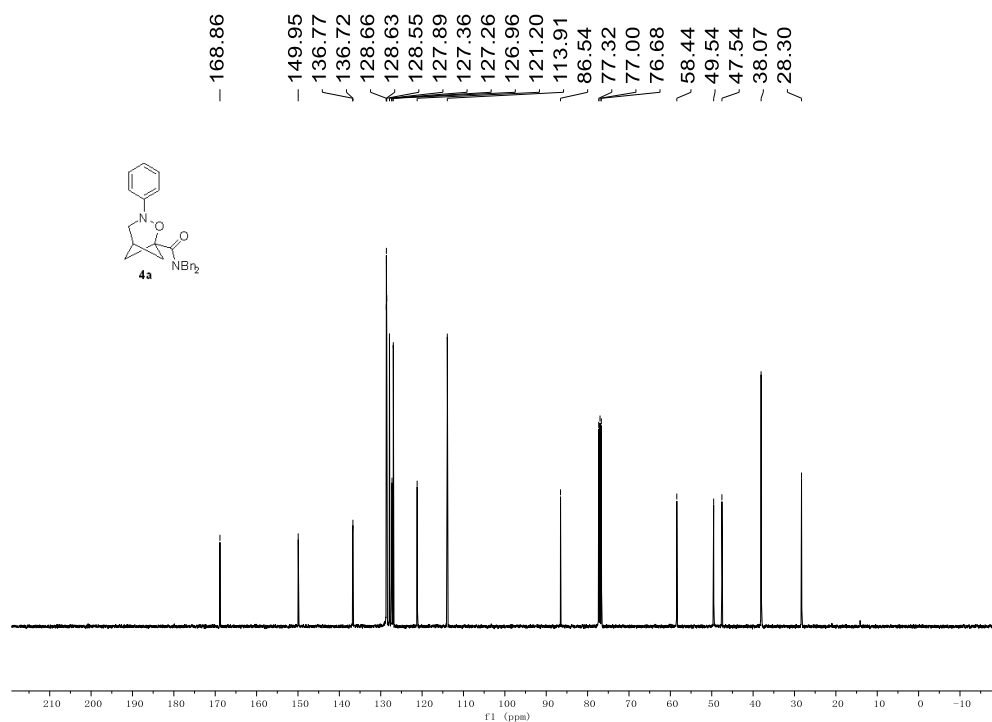

***N,N*-diisopropyl-3-phenyl-2-oxa-3-azabicyclo[3.1.1]heptane-1-carboxamide. (4b)**

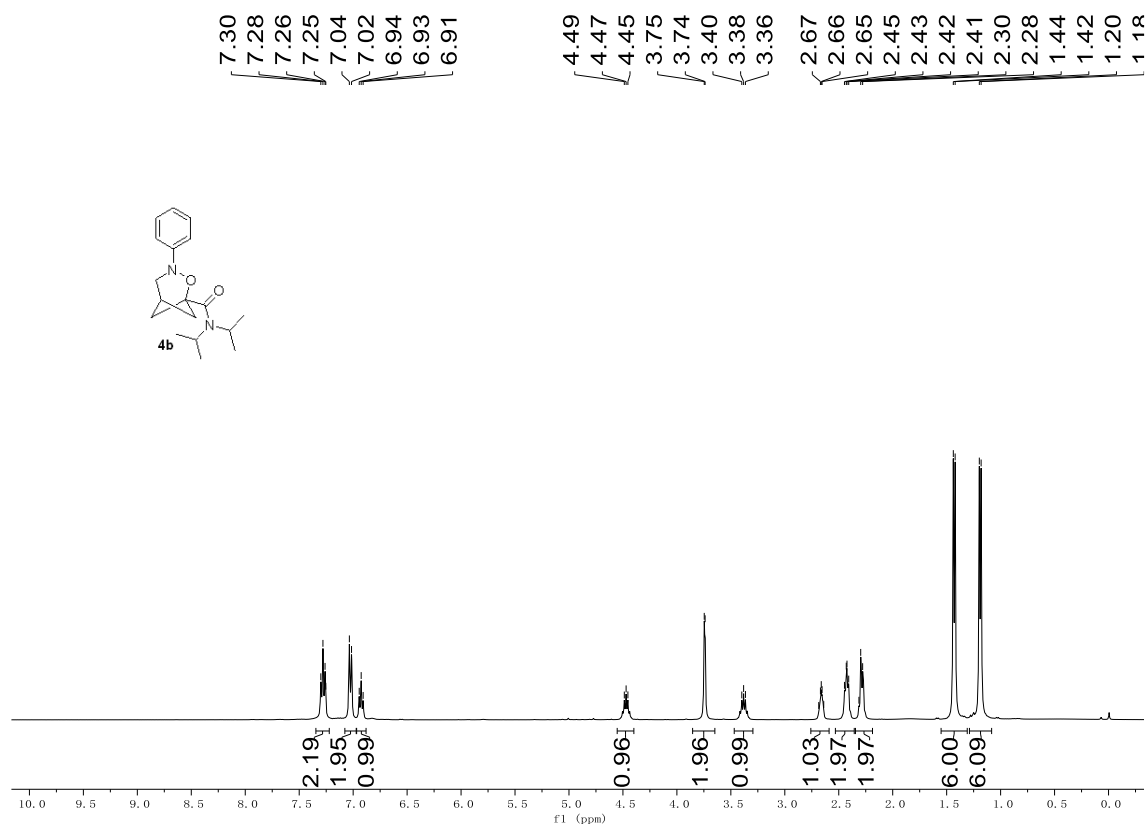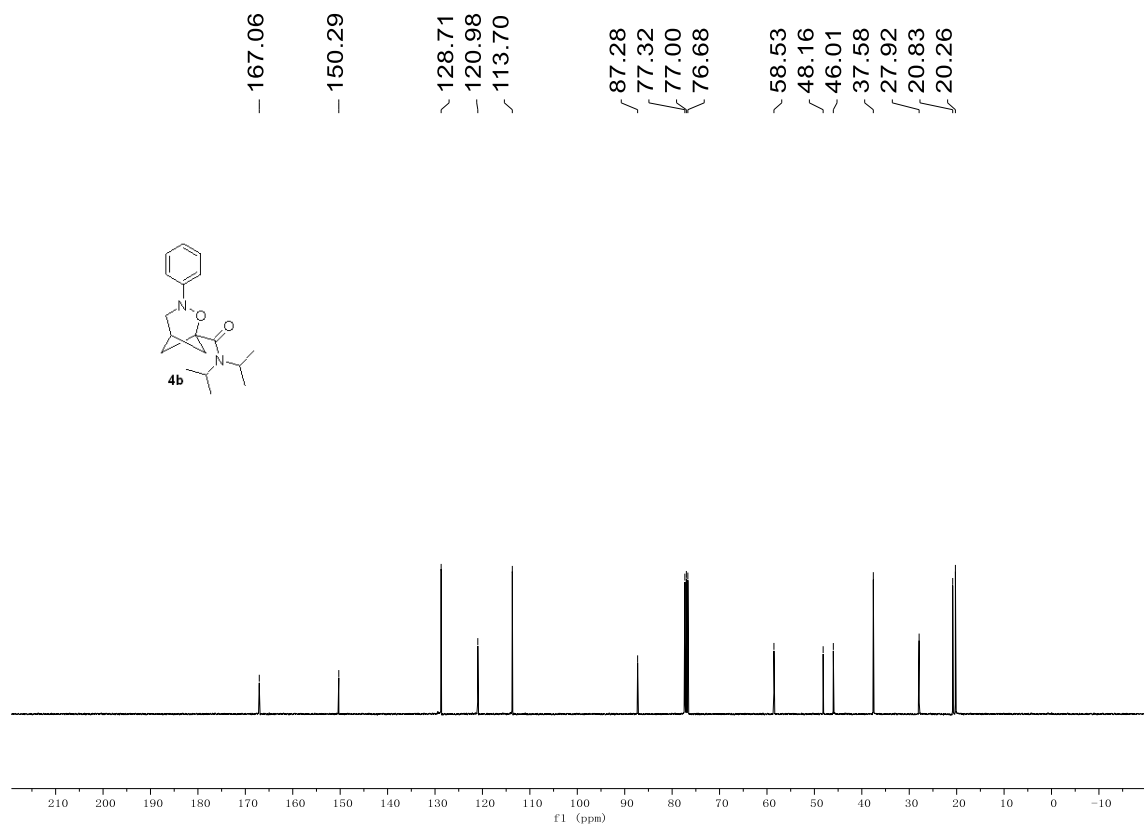

***N*-methyl-*N*,3-diphenyl-2-oxa-3-azabicyclo[3.1.1]heptane-1-carboxamide. (4c)**

7.34  
7.32  
7.30  
7.28  
7.25  
6.91  
6.86

— 3.56  
— 3.33

— 2.45  
— 2.24  
— 1.80

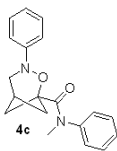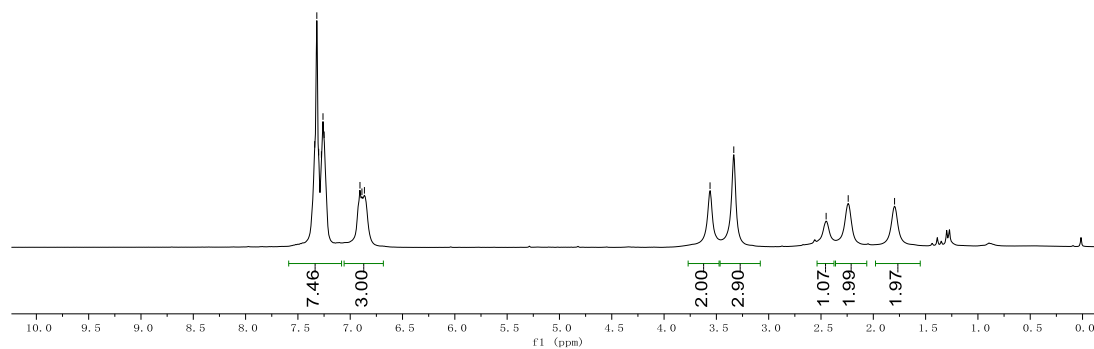

— 168.13  
— 150.36  
— 142.86

128.92  
128.47  
127.67  
120.74  
113.84

86.17  
77.32  
77.00  
76.68

— 58.65

38.68  
38.28  
— 27.75

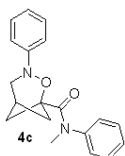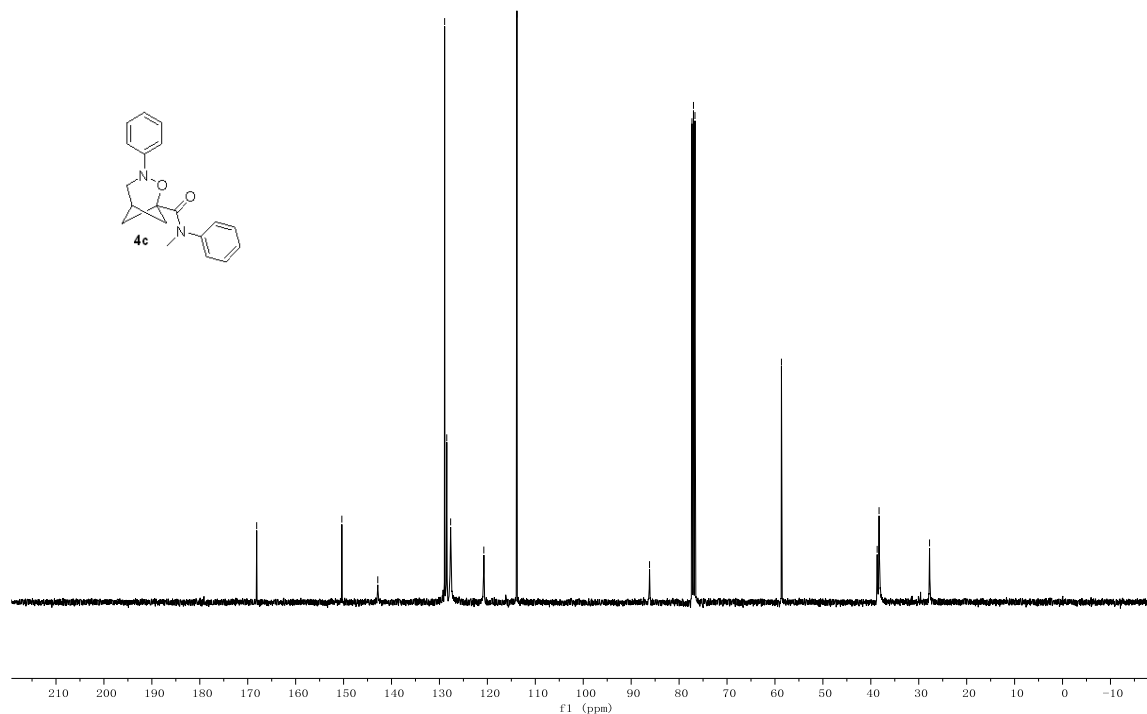

***N*-methoxy-*N*-methyl-3-phenyl-2-oxa-3-azabicyclo[3.1.1]heptane-1-carboxamide. (4d)**

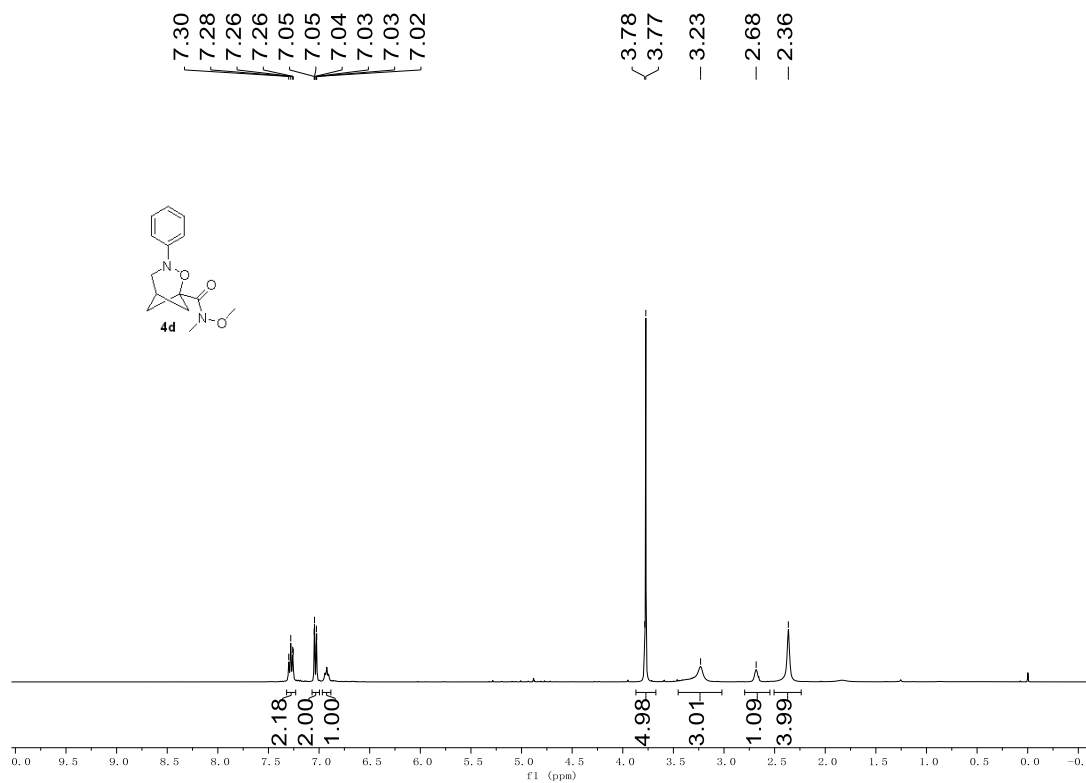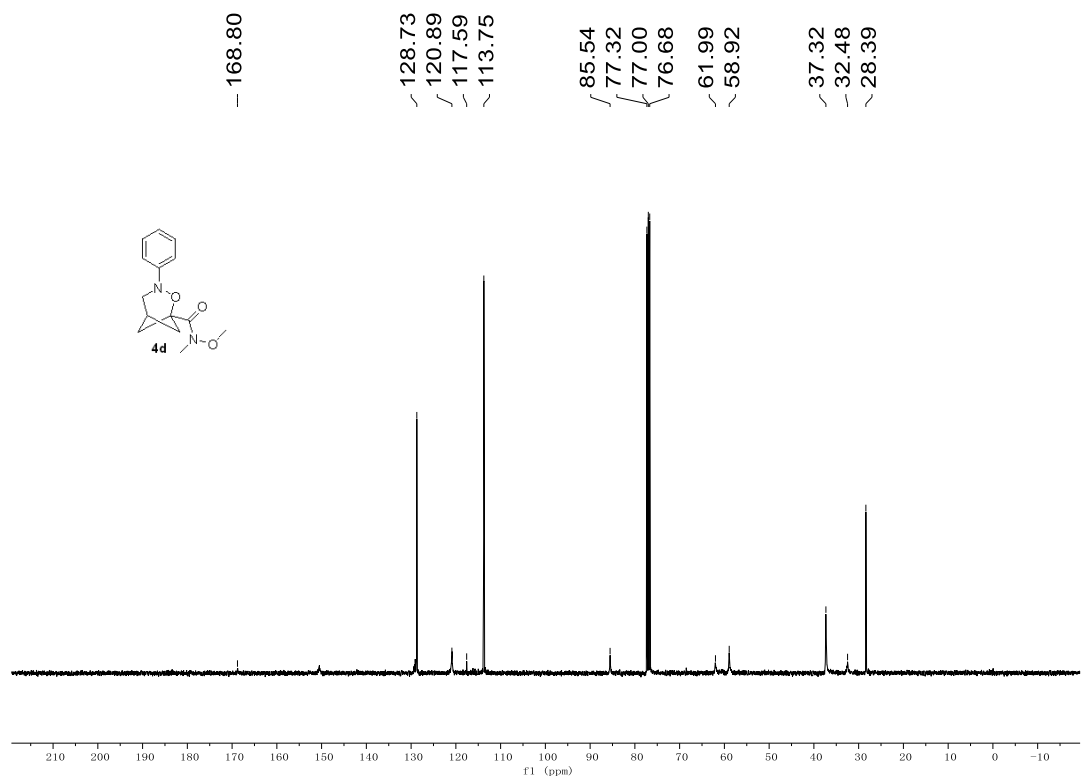

***N,N*-dibenzyl-3-(4-fluorophenyl)-2-oxa-3-azabicyclo[3.1.1]heptane-1-carboxamide.(4e)**

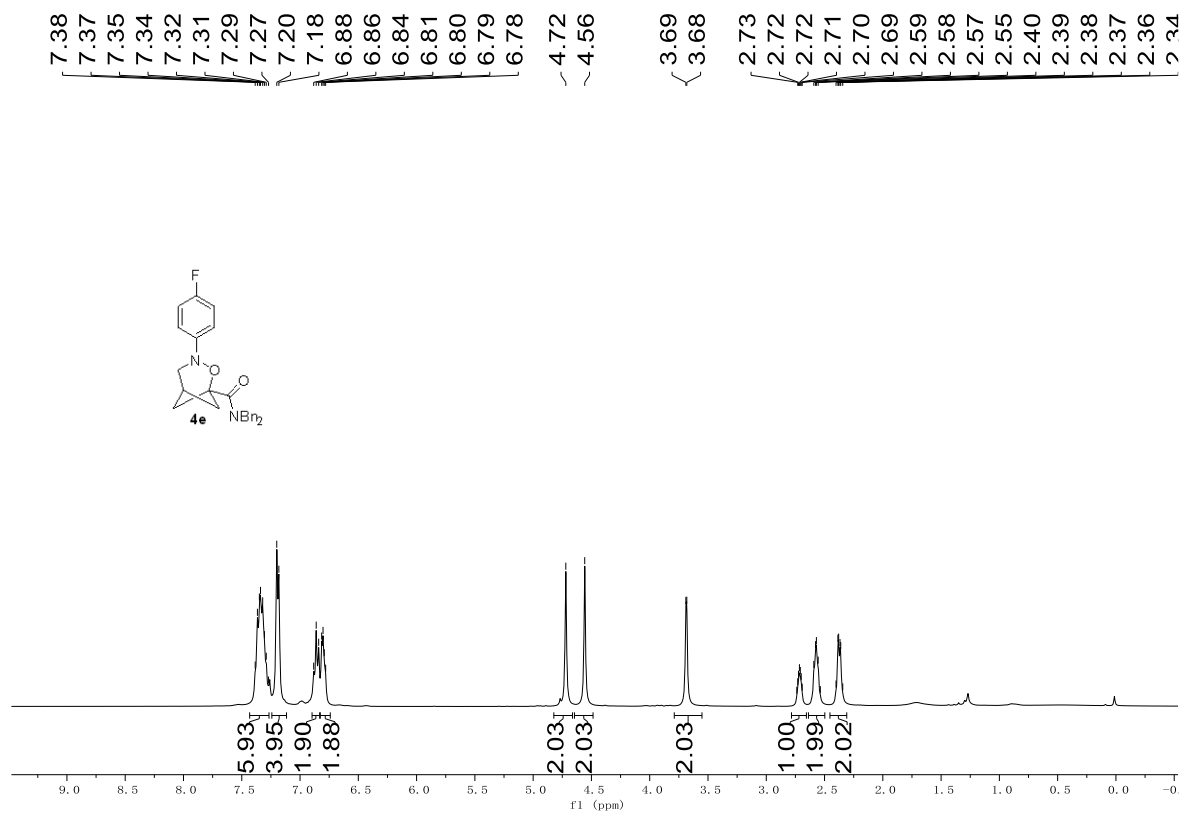

168.86  
 159.20  
 156.82  
 146.28  
 146.25  
 136.76  
 136.74  
 128.73  
 128.61  
 127.98  
 127.45  
 127.36  
 126.98  
 116.02  
 115.95  
 115.28  
 115.06  
 86.67  
 77.32  
 77.00  
 76.68  
 59.20  
 49.51  
 47.60  
 38.08  
 28.36

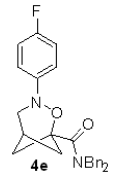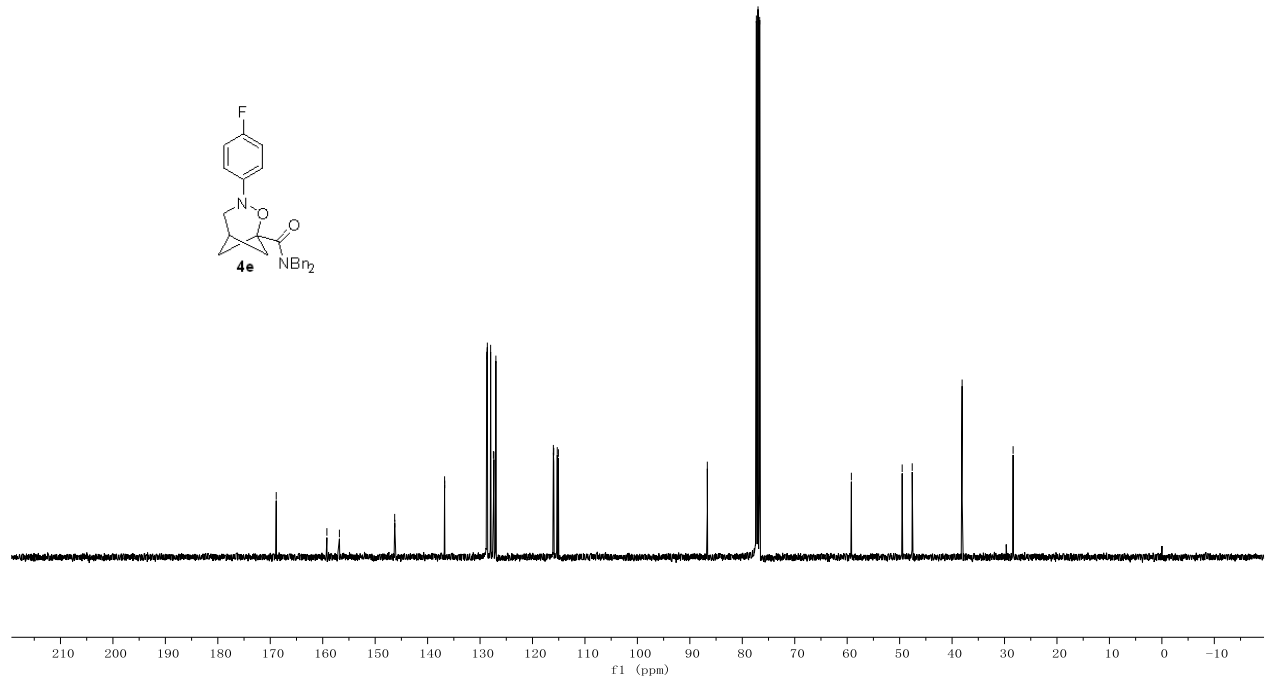

--122.52

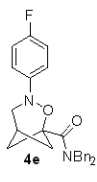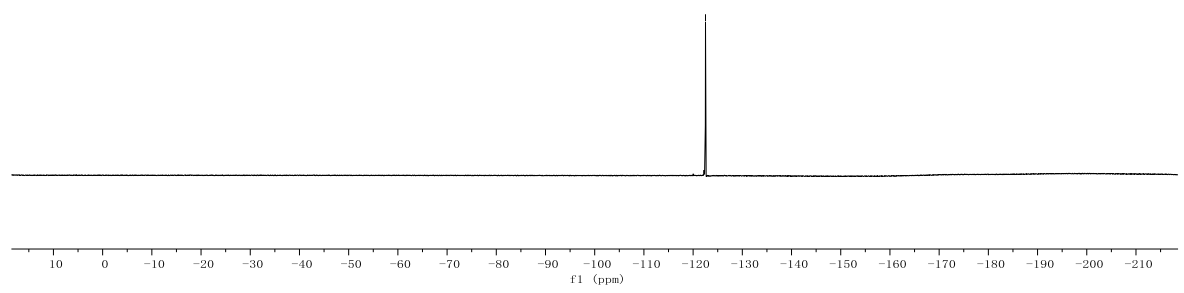

***N,N*-dibenzyl-3-(4-chlorophenyl)-2-oxa-3-azabicyclo[3.1.1]heptane-1-carboxamide.(4f)**

7.38  
7.35  
7.33  
7.26  
7.20  
7.12  
7.10  
6.75  
6.73  
4.71  
4.57  
3.71  
2.72  
2.58  
2.36  
2.34

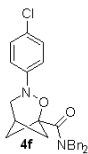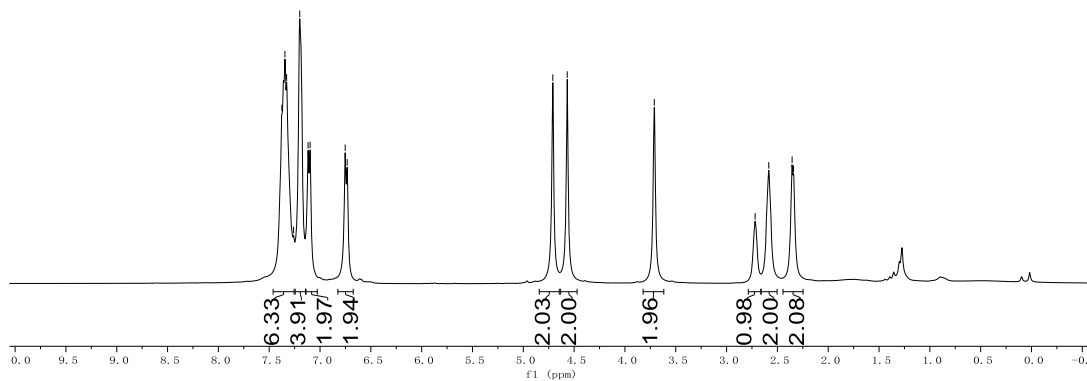

168.68  
148.48  
136.68  
136.67  
128.74  
128.59  
128.51  
127.93  
127.47  
127.36  
126.88  
126.11  
115.19  
86.72  
77.32  
77.00  
76.68  
58.54  
49.48  
47.61  
38.02  
28.23

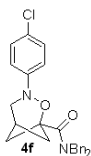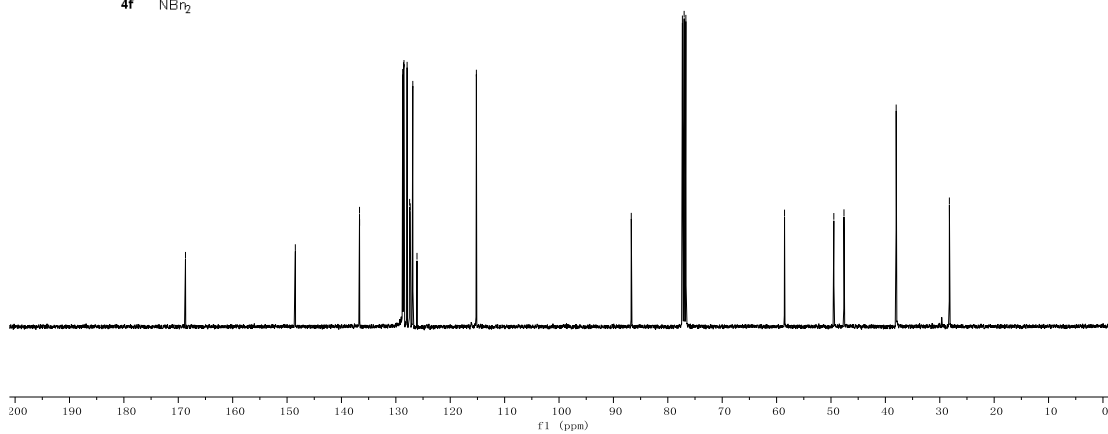

***N,N*-dibenzyl-3-(*p*-tolyl)-2-oxa-3-azabicyclo[3.1.1]heptane-1-carboxamide (4g)**

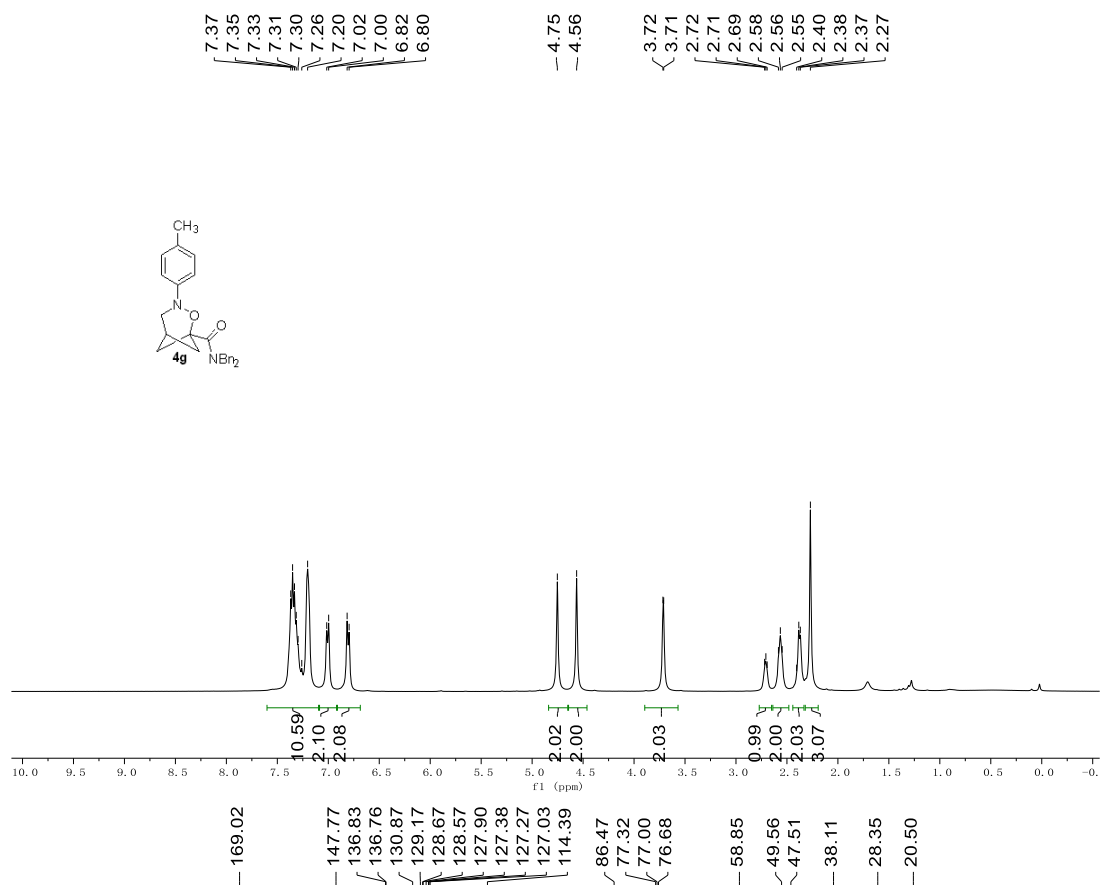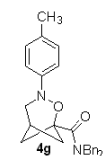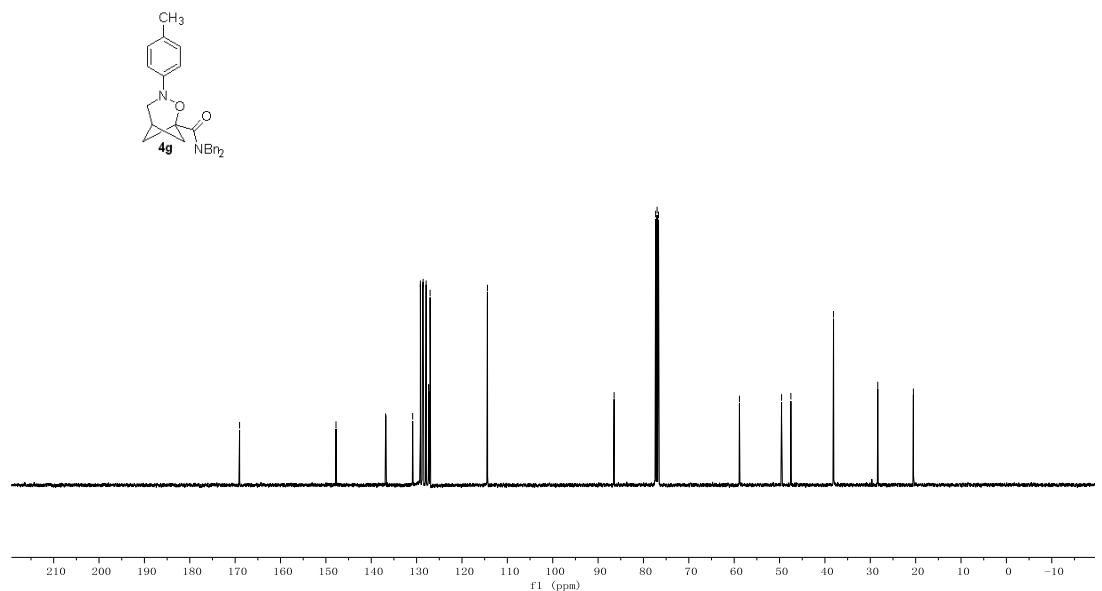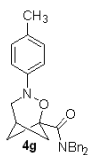



***N,N*-dibenzyl-3-(4-cyanophenyl)-2-oxa-3-azabicyclo[3.1.1]heptane-1-carboxamide (4h)**

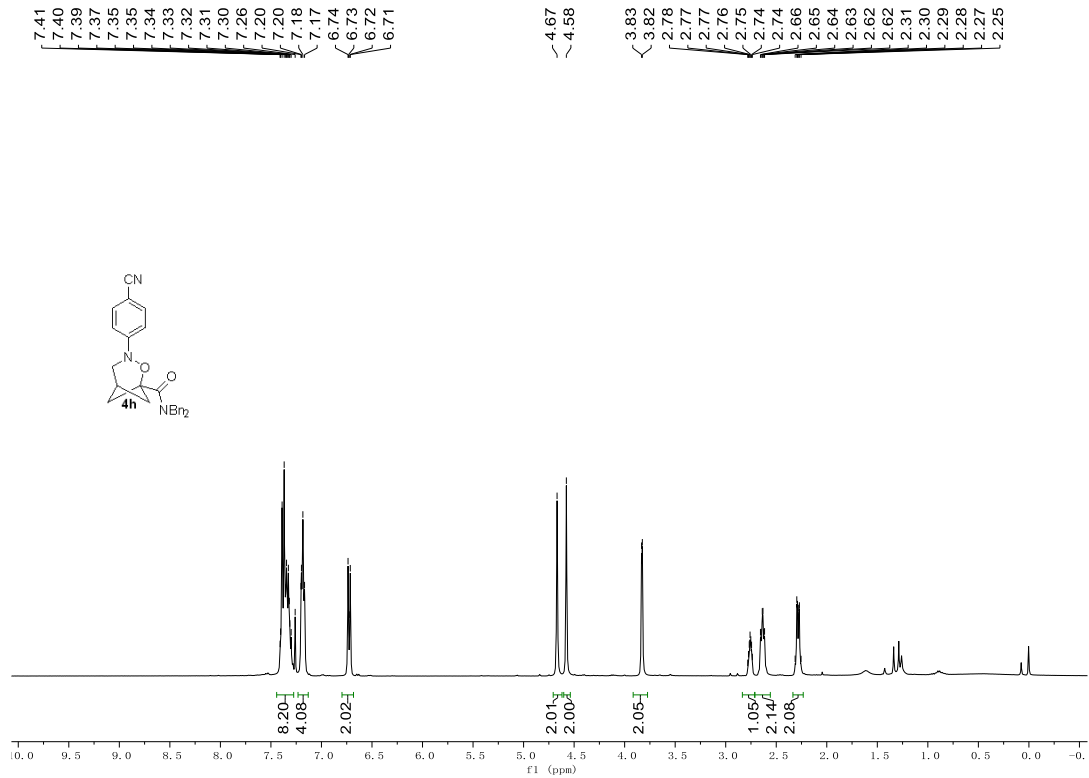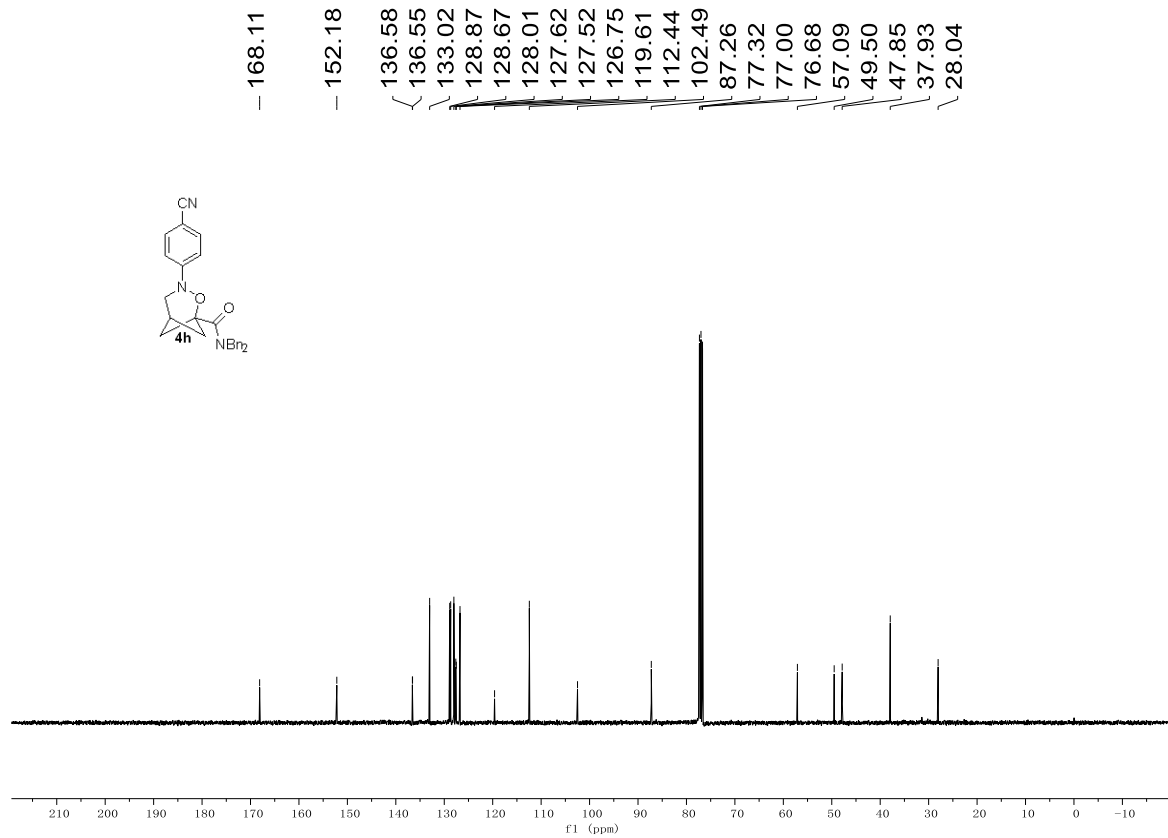

**methyl 4-(1-(dibenzylcarbamoyl)-2-oxa-3-azabicyclo[3.1.1]heptan-3-yl)benzoate.(4i)**

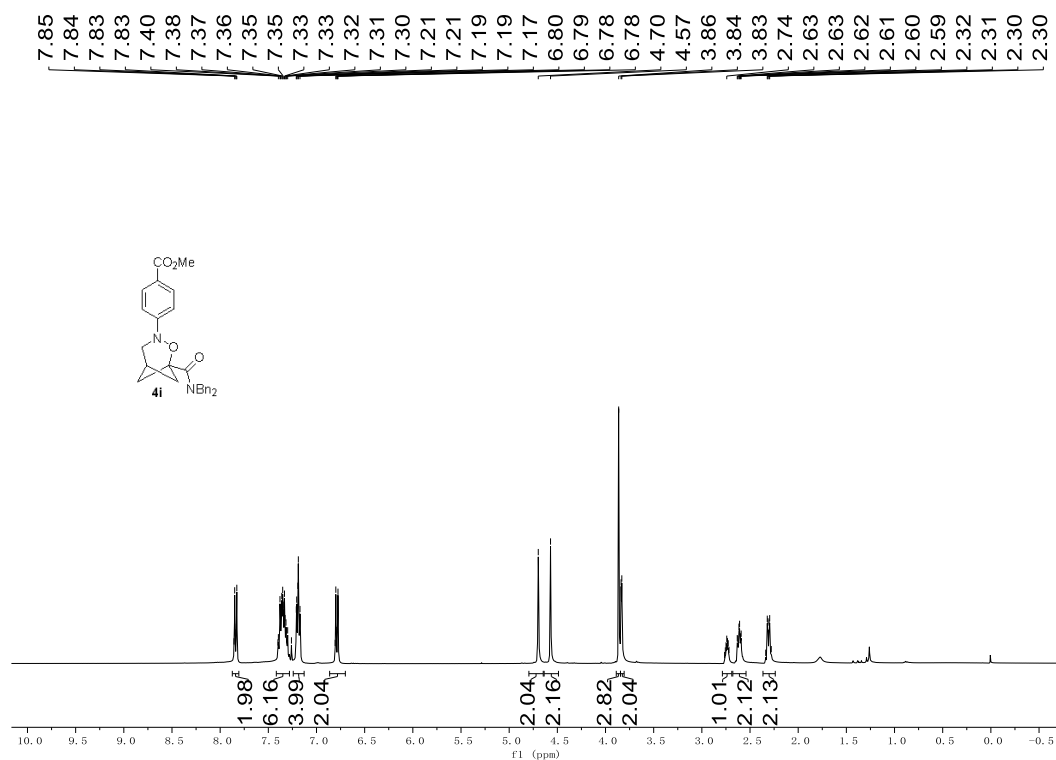

**13C NMR Data (ppm):**

- 168.36, 166.87, 152.92, 136.57, 136.53, 130.67, 128.78, 128.62, 127.90, 127.56, 127.42, 126.82, 121.64, 111.91, 86.96, 77.32, 77.00, 76.68, 57.34, 51.71, 49.52, 47.66, 37.95, 28.09

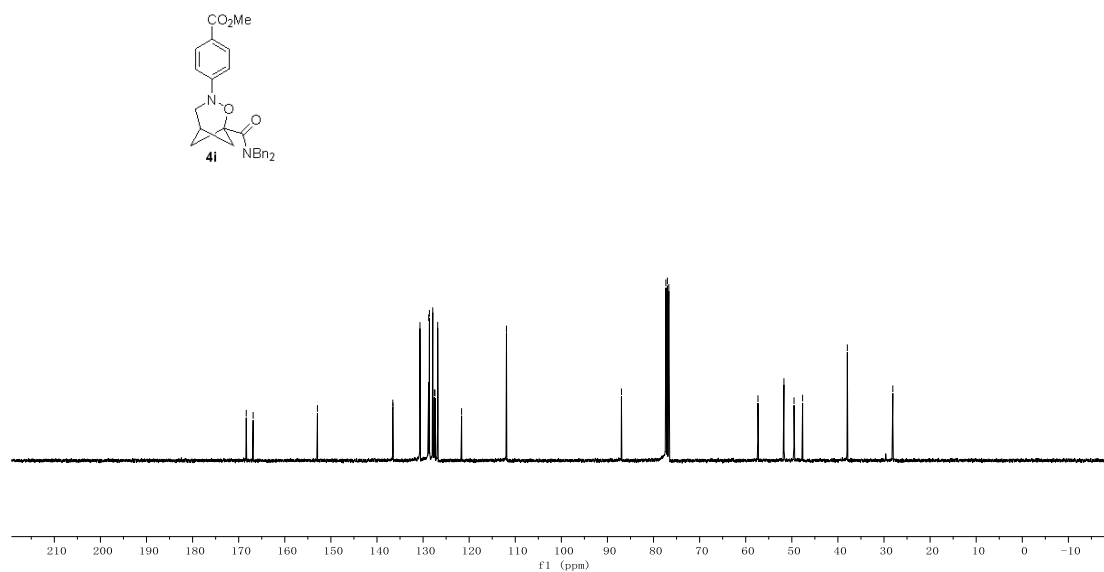

***N,N*-dibenzyl-3-(3-fluorophenyl)-2-oxa-3-azabicyclo[3.1.1]heptane-1-carboxamide (4j)**

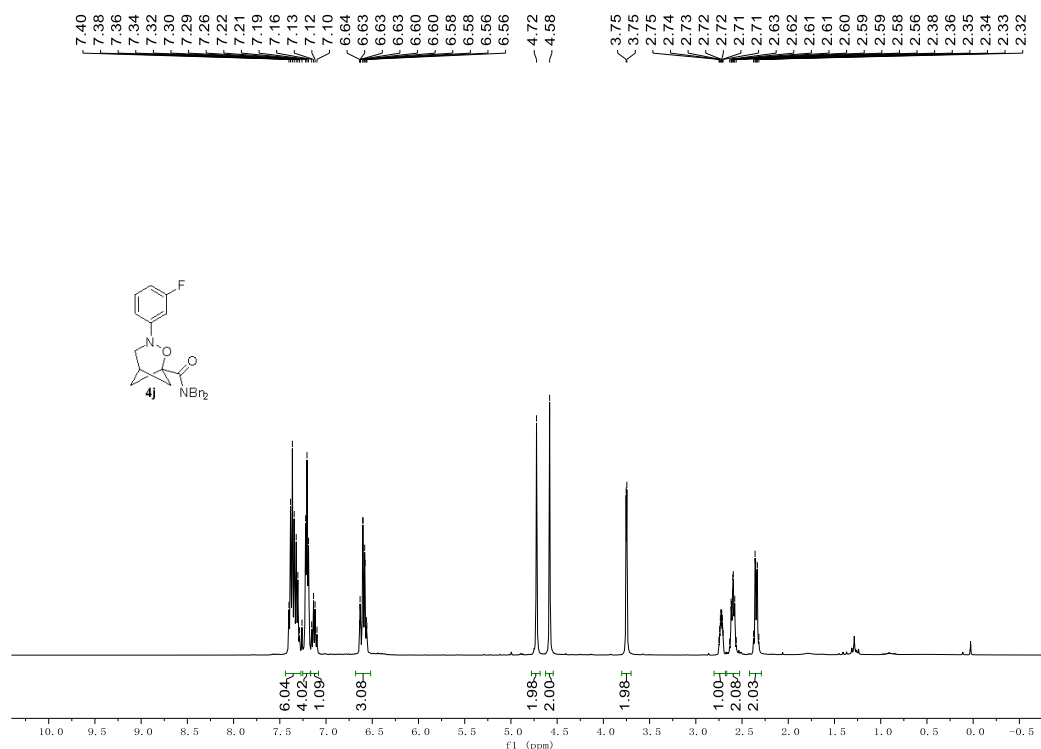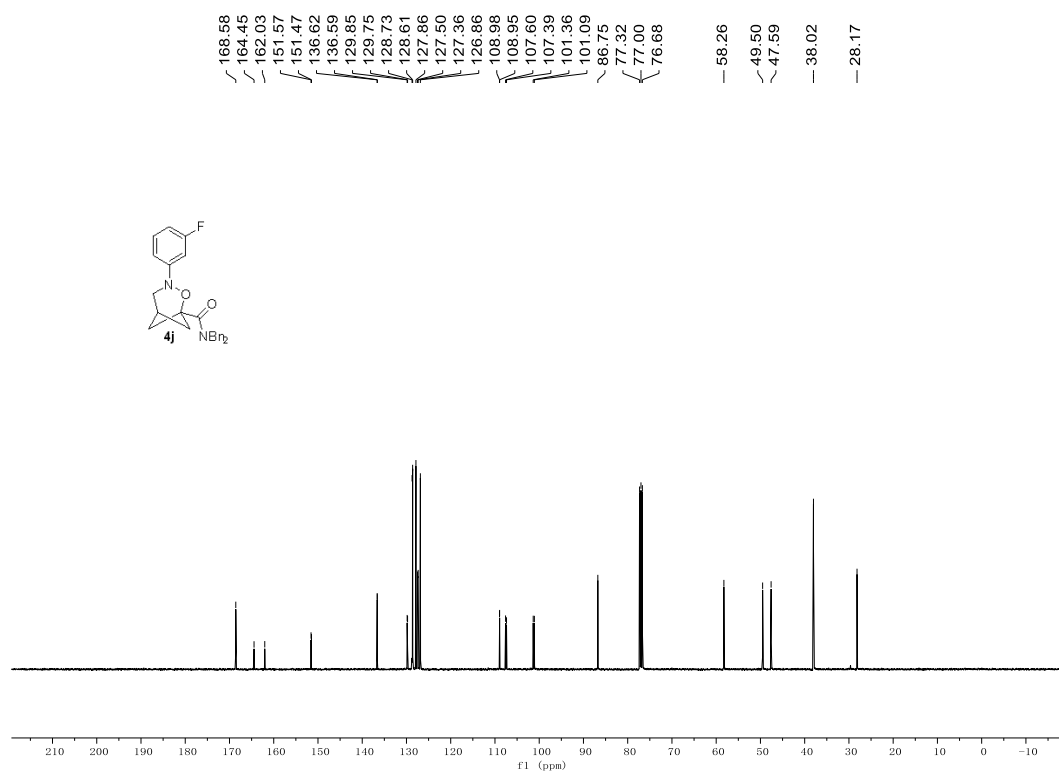

--112.14

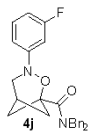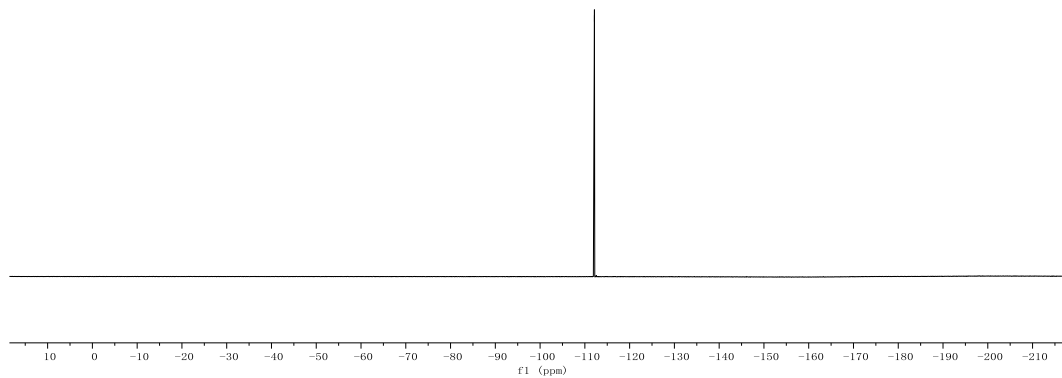

***N,N*-dibenzyl-3-(3-chlorophenyl)-2-oxa-3-azabicyclo[3.1.1]heptane-1-carboxamide (4k)**

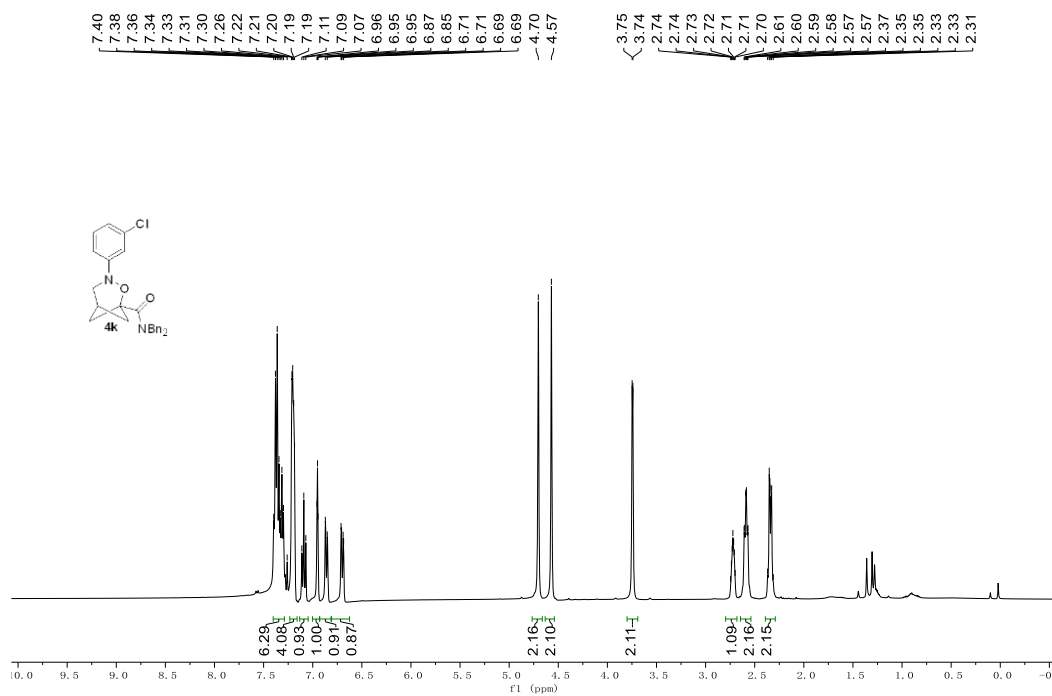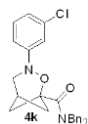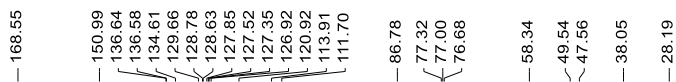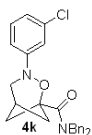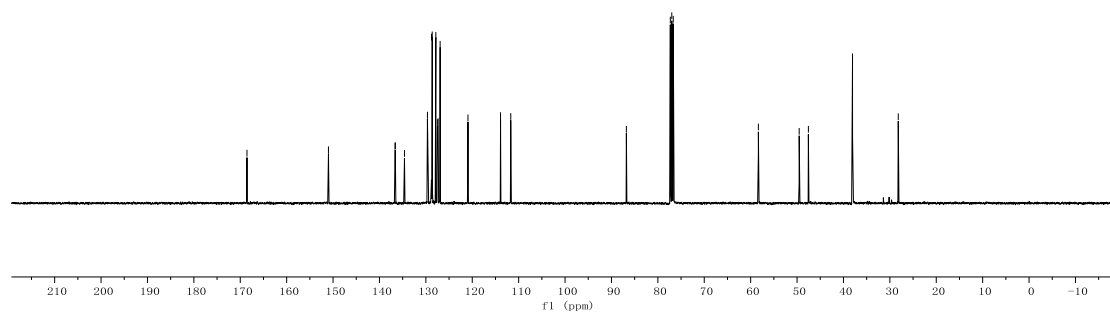

***N,N*-dibenzyl-3-(*m*-tolyl)-2-oxa-3-azabicyclo[3.1.1]heptane-1-carboxamide. (4I)**

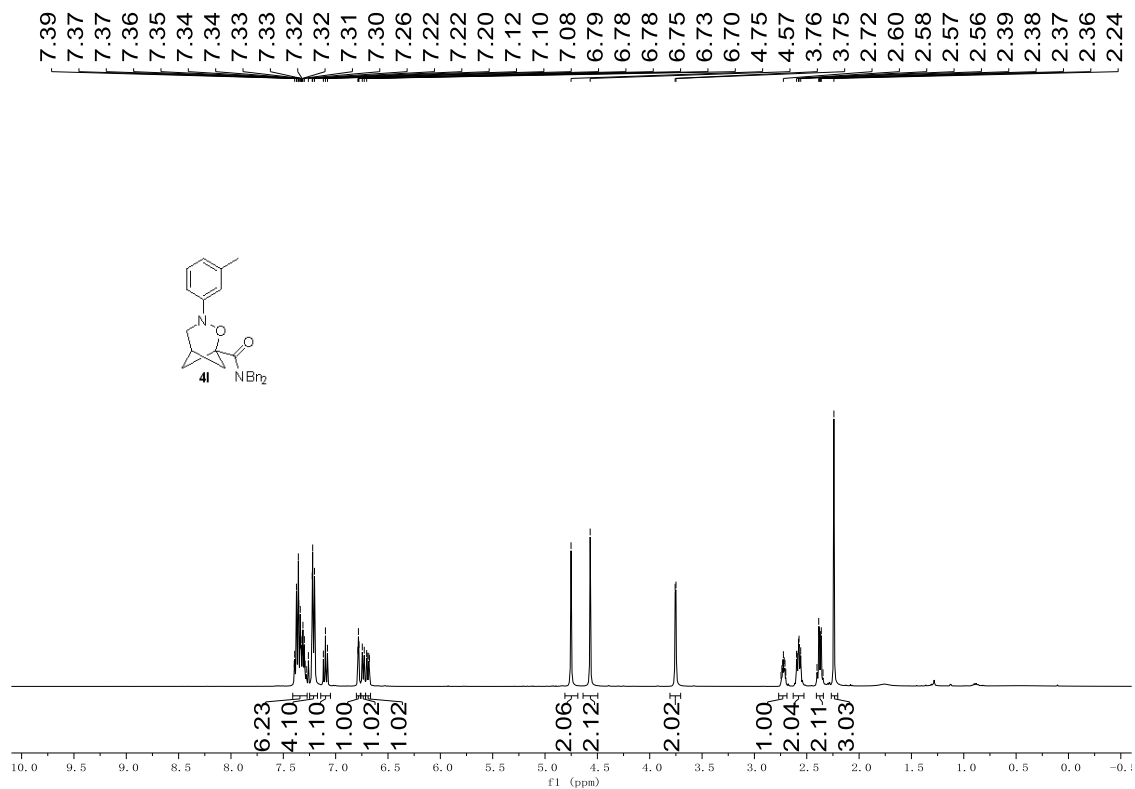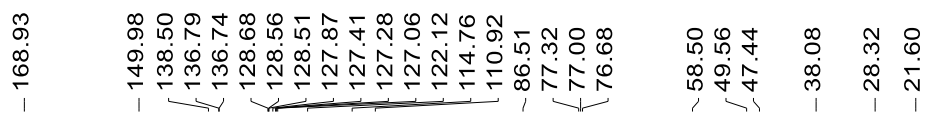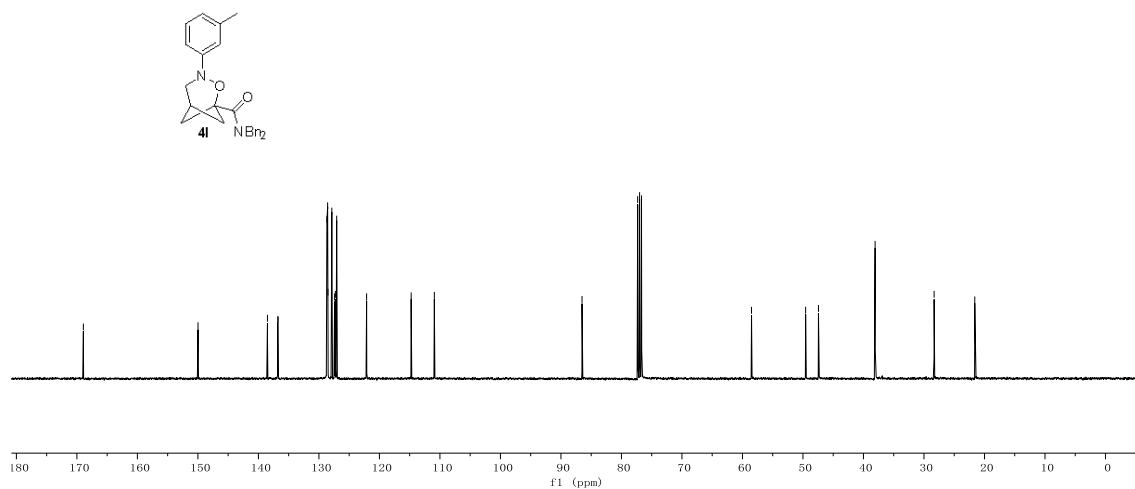

***N,N*-dibenzyl-3-(*o*-tolyl)-2-oxa-3-azabicyclo[3.1.1]heptane-1-carboxamide. (4m)**

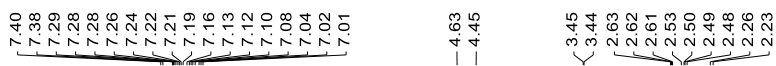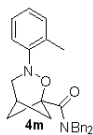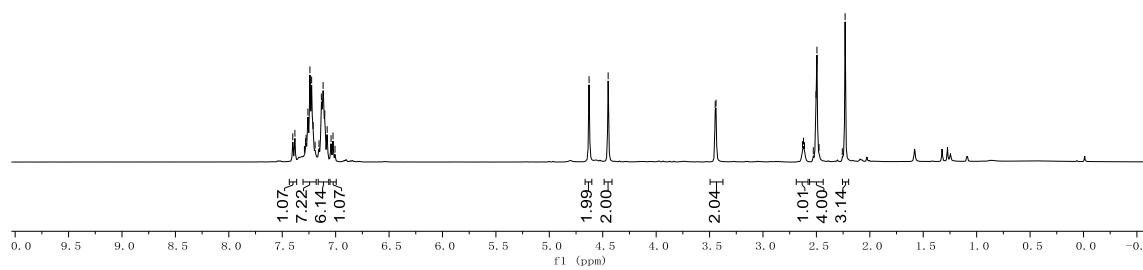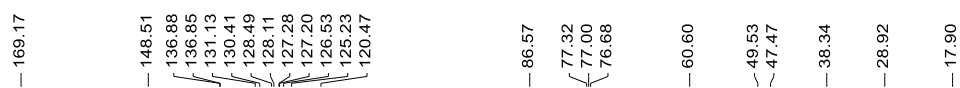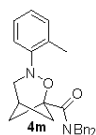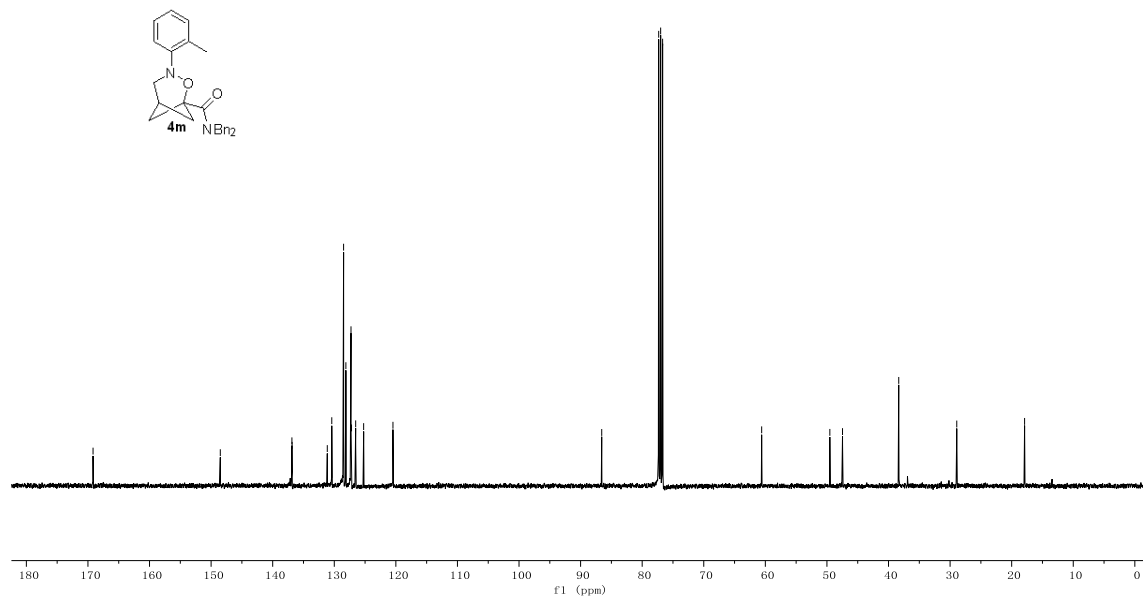

***N,N*-dibenzyl-3-(3-bromo-4-methylphenyl)-2-oxa-3-azabicyclo[3.1.1]heptane-1-carboxamide (4n)**

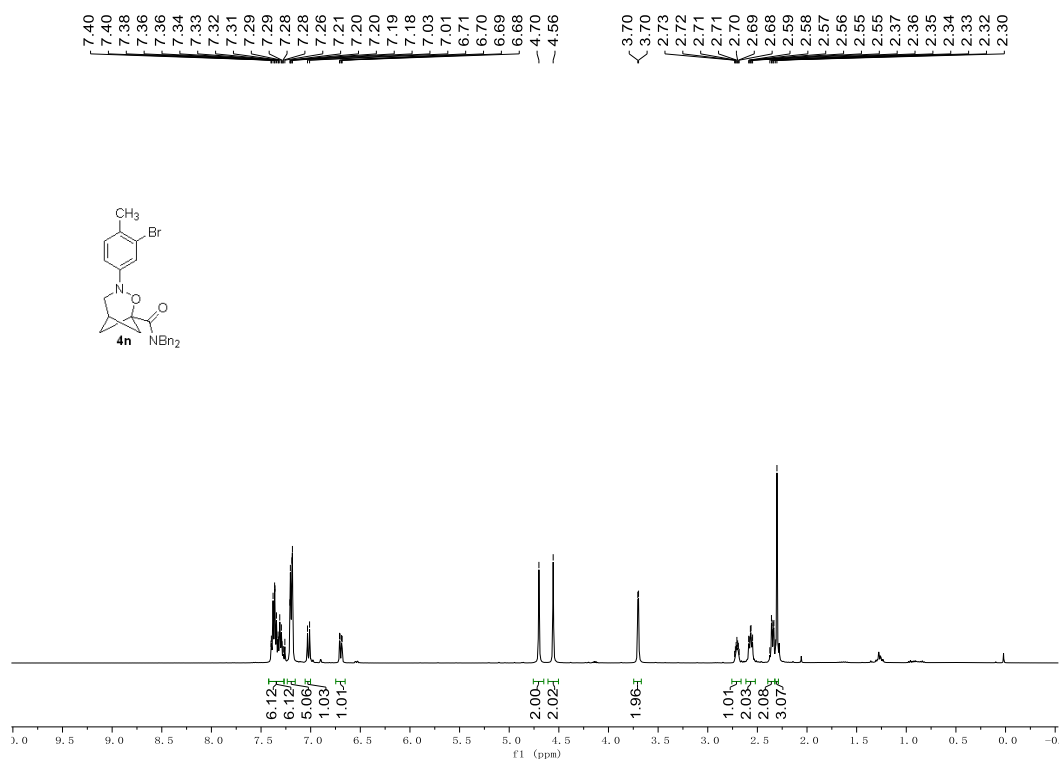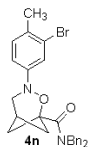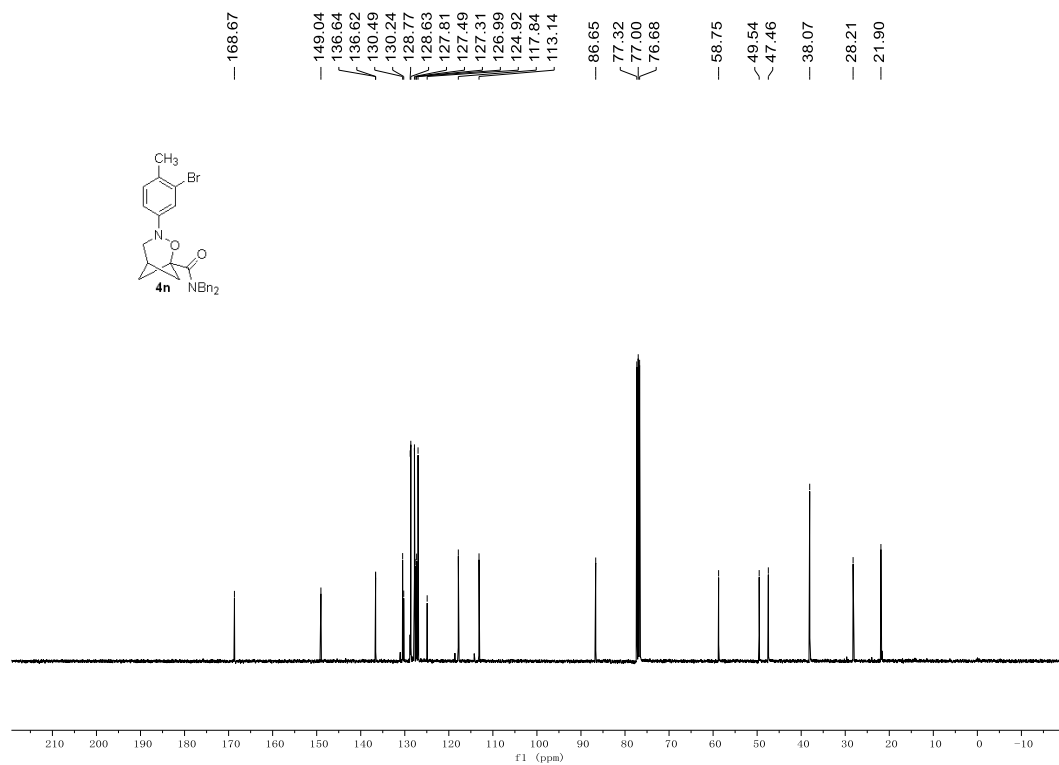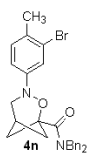



***N,N*-dibenzyl-3-cyclohexyl-2-oxa-3-azabicyclo[3.1.1]heptane-1-carboxamide (4o).**

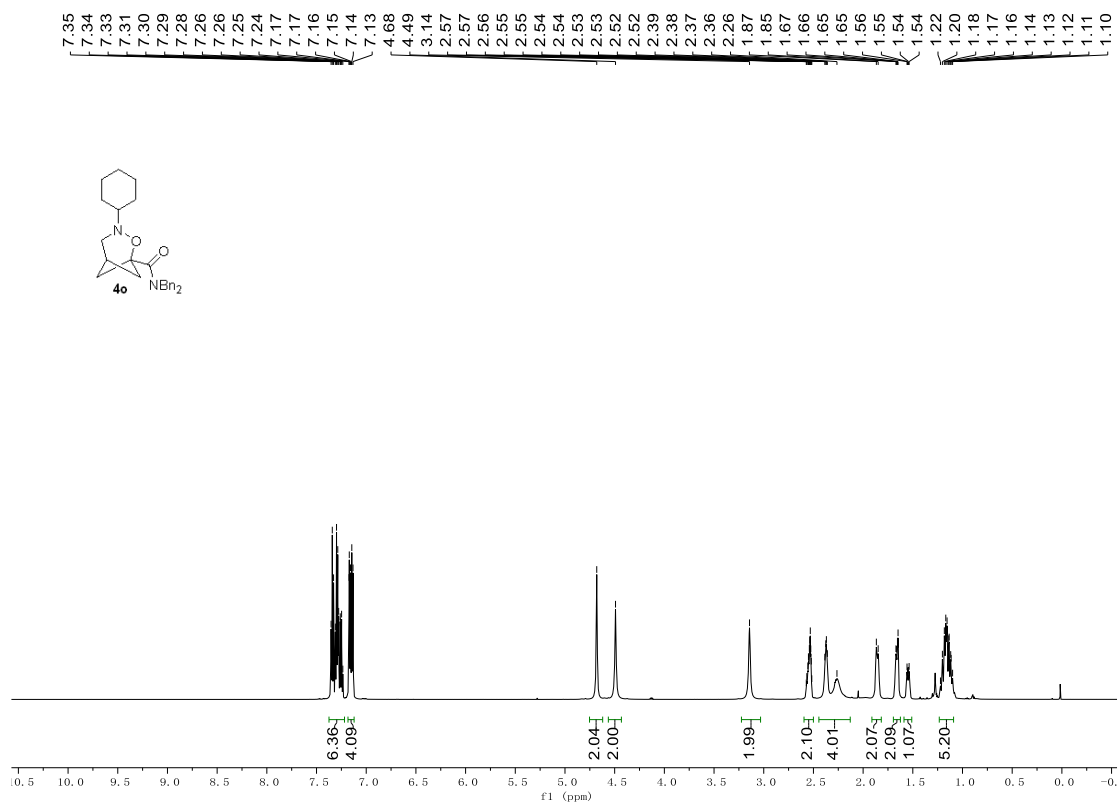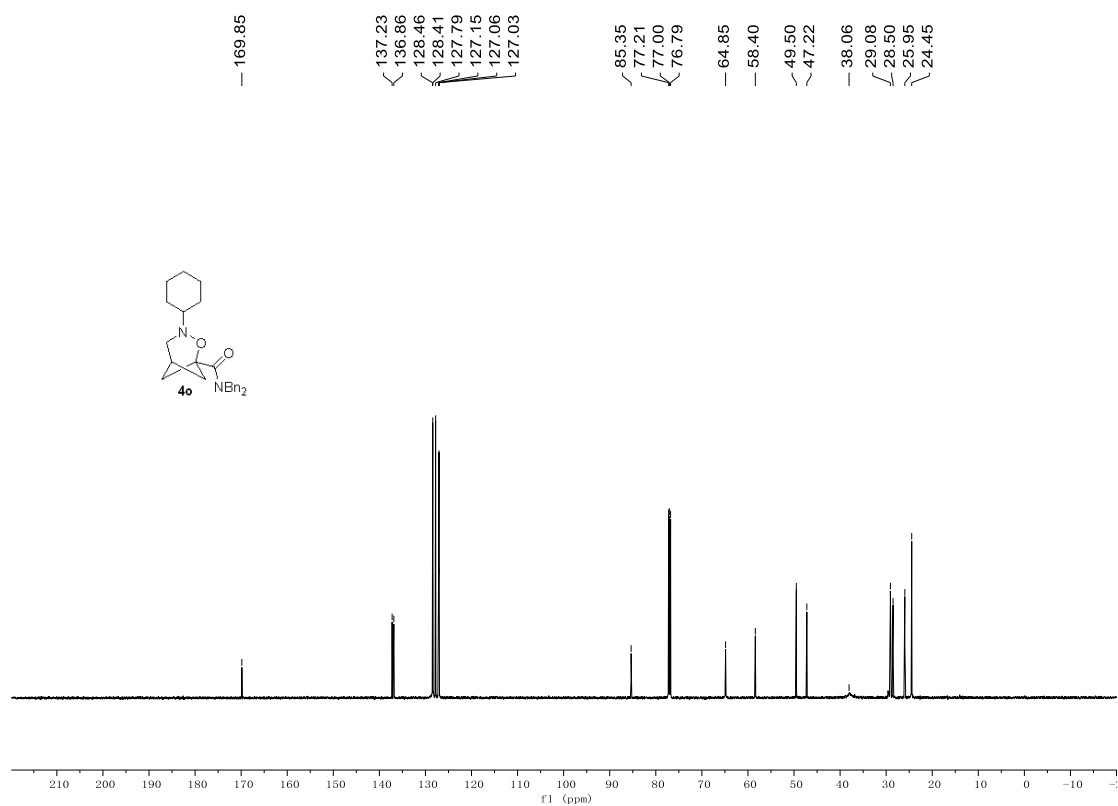

***N,N*-dibenzyl-3-cyclopentyl-2-oxa-3-azabicyclo[3.1.1]heptane-1-carboxamide(4p)**

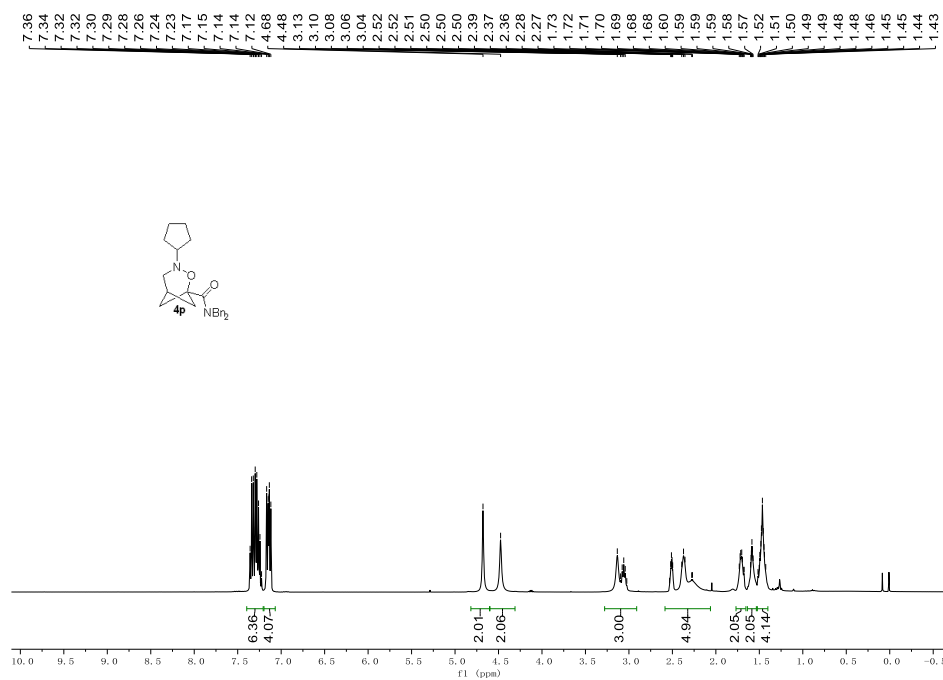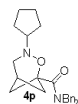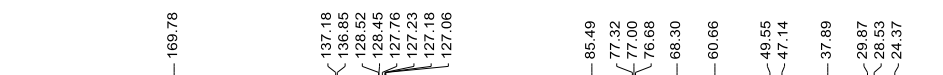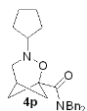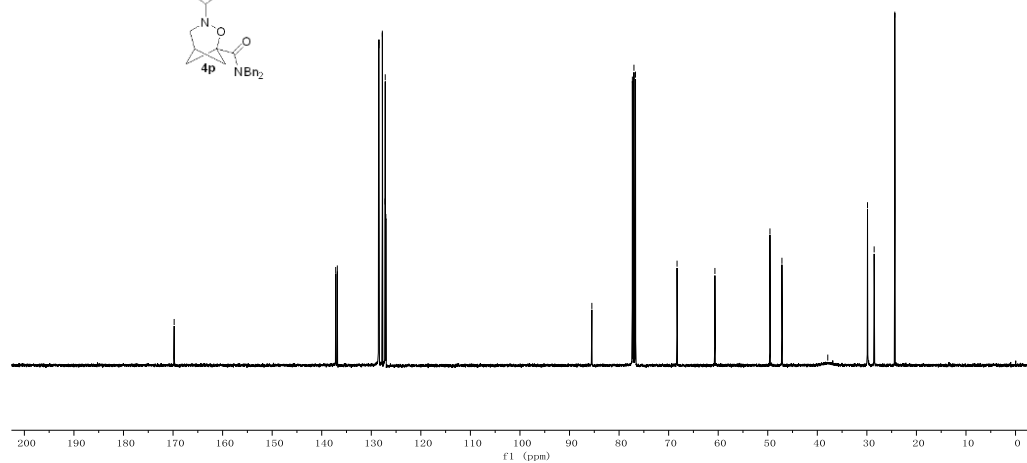

Methyl 3,5-diphenyl-2-oxa-3-azabicyclo[3.1.1]heptane-1-carboxylate.(5a)

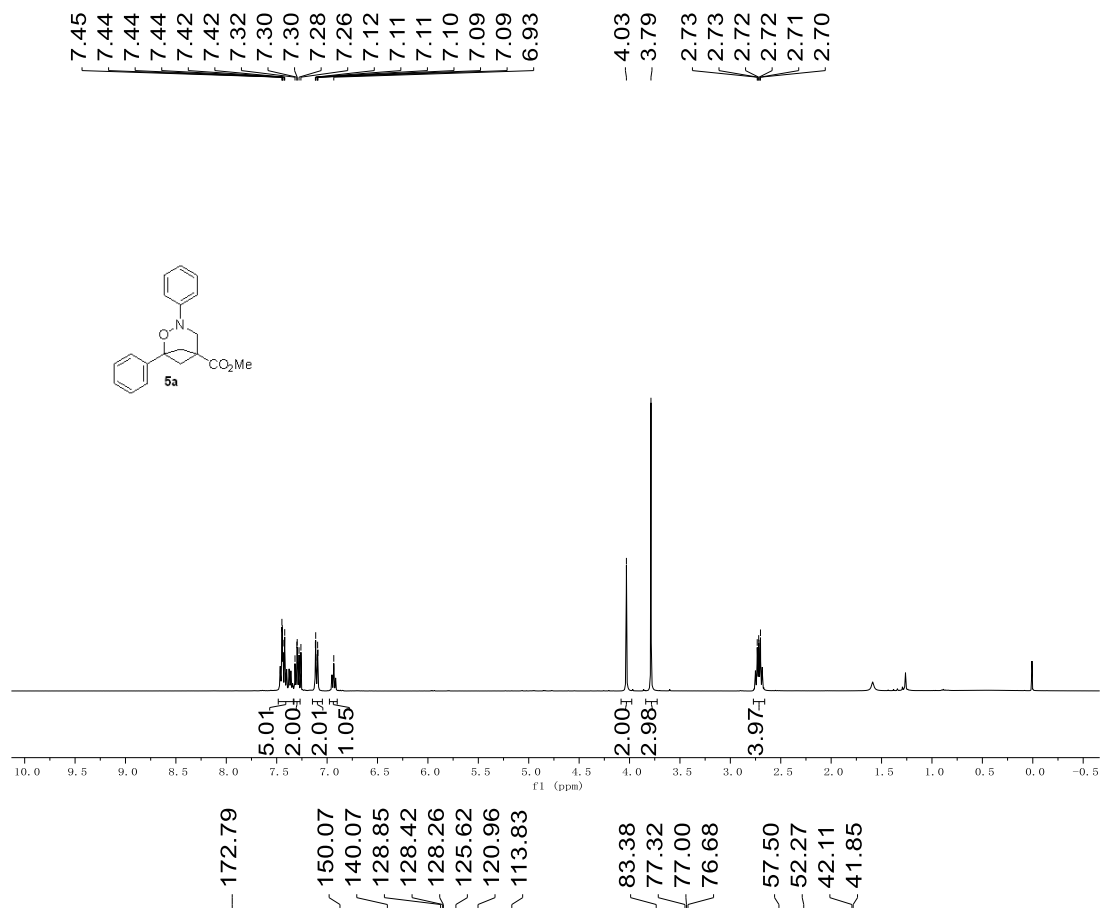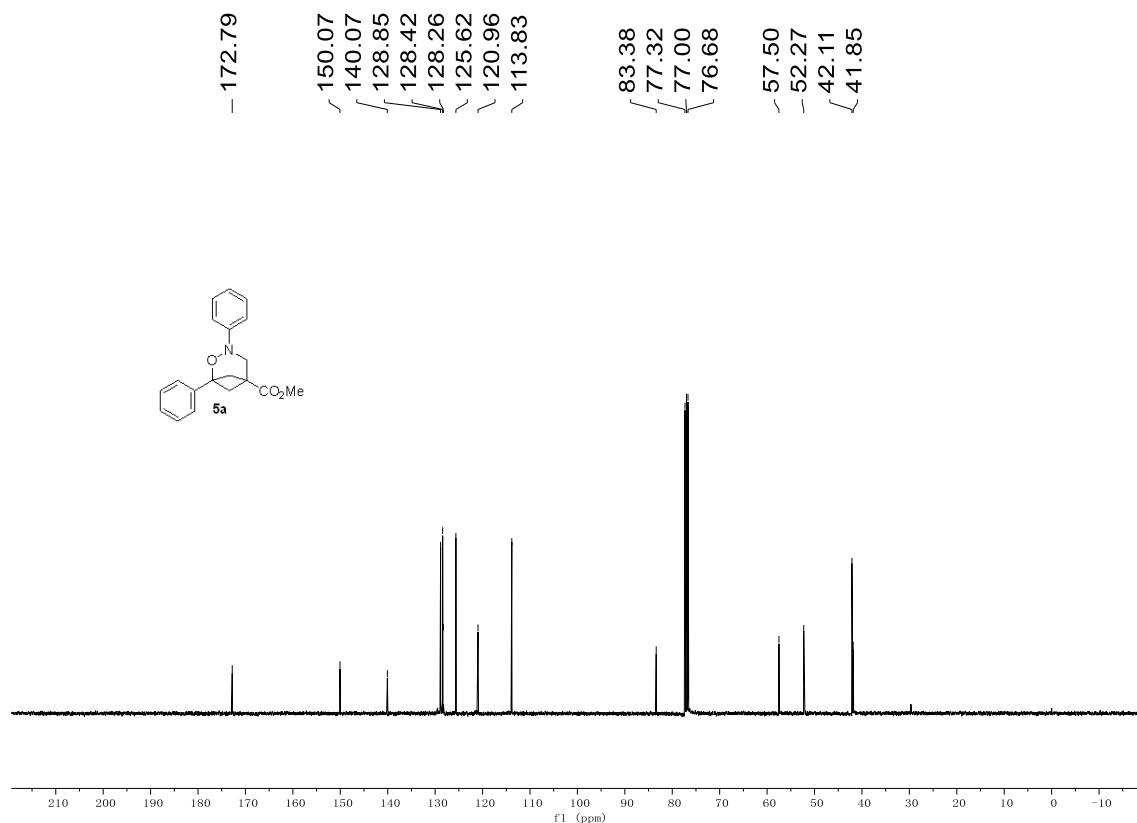

**Methyl 3-phenyl-5-(p-tolyl)-2-oxa-3-azabicyclo[3.1.1]heptane-1-carboxylate.(5b)**

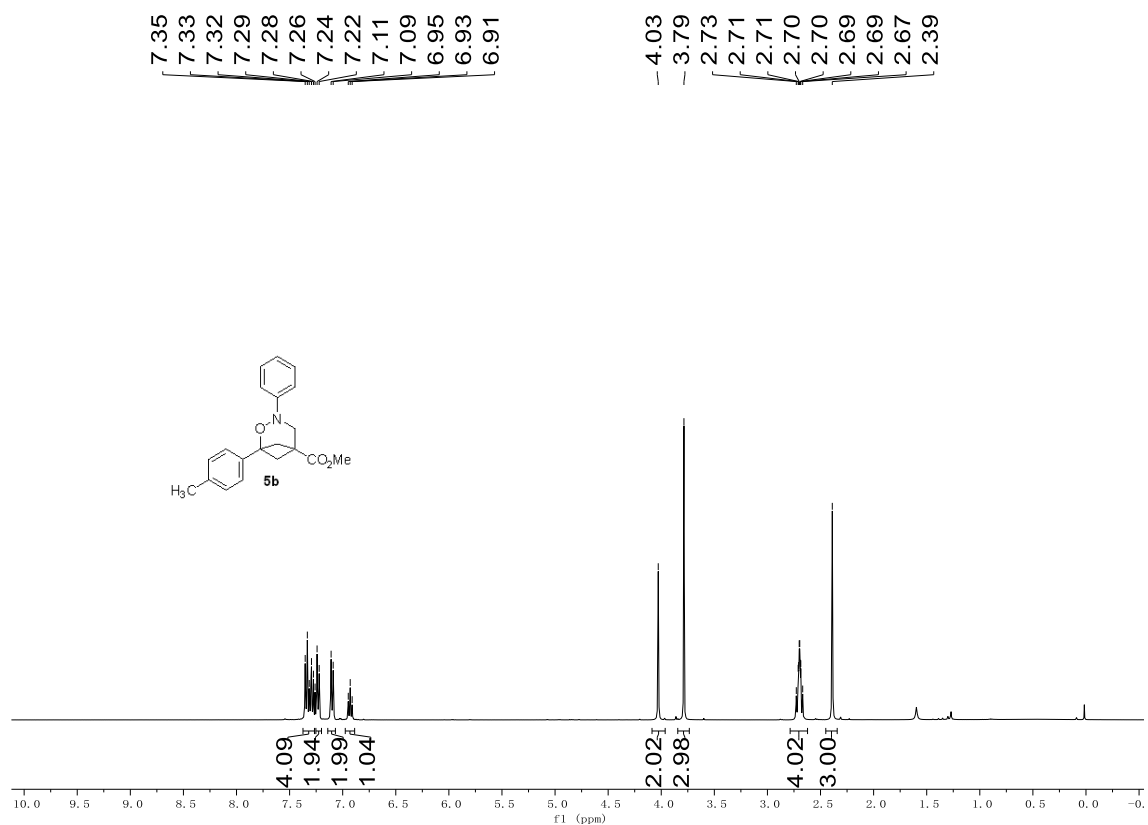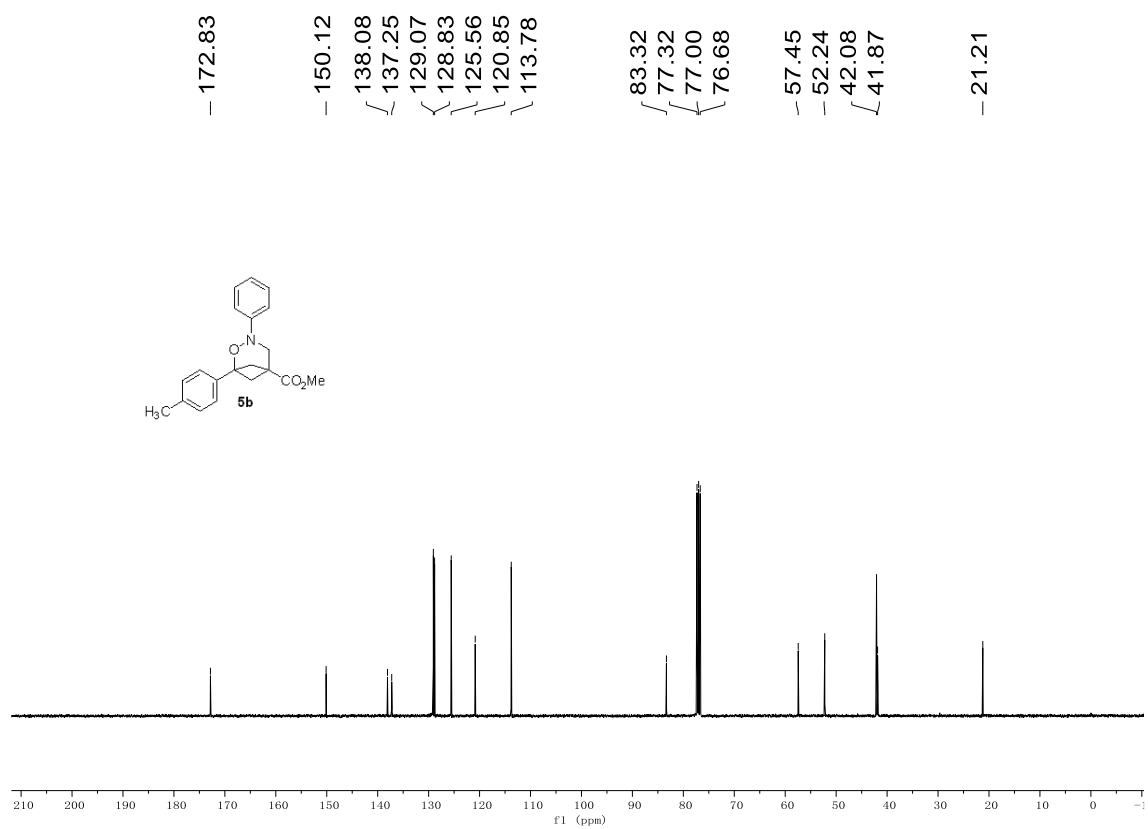

**Methyl 5-(4-fluorophenyl)-3-phenyl-2-oxa-3-azabicyclo[3.1.1]heptane-1-carboxylate.(5c)**

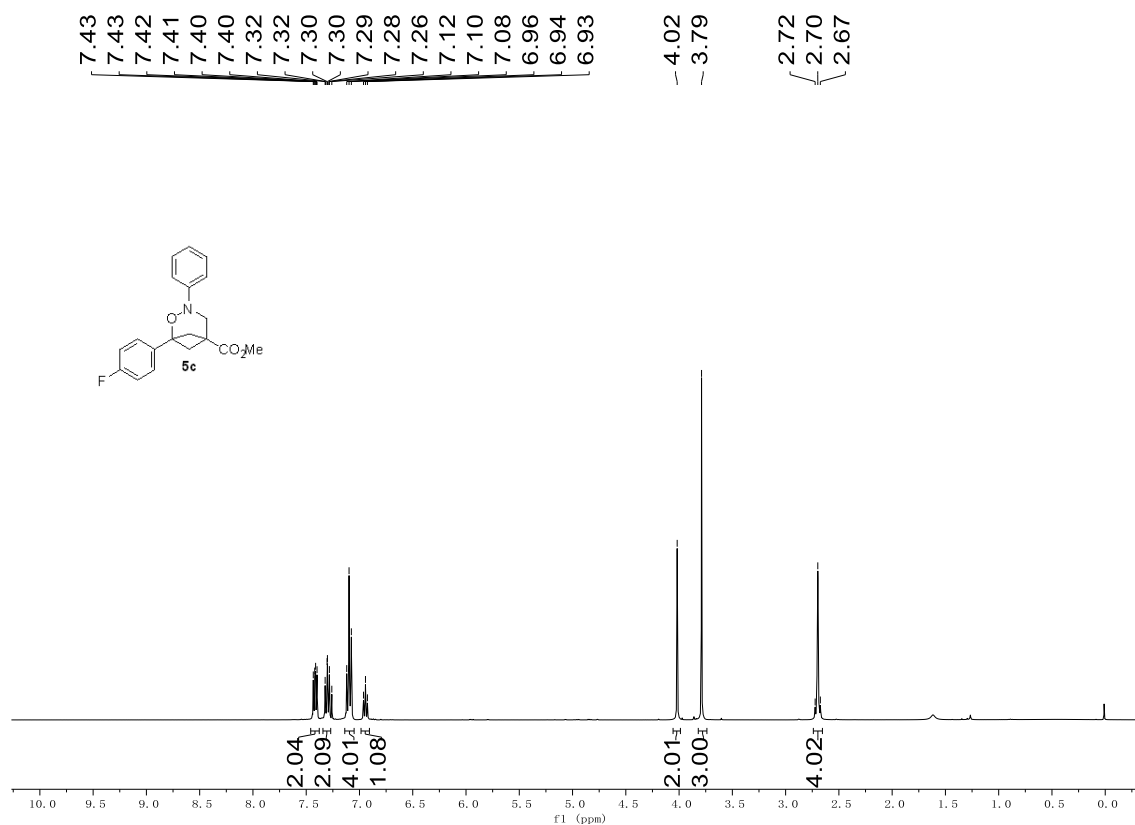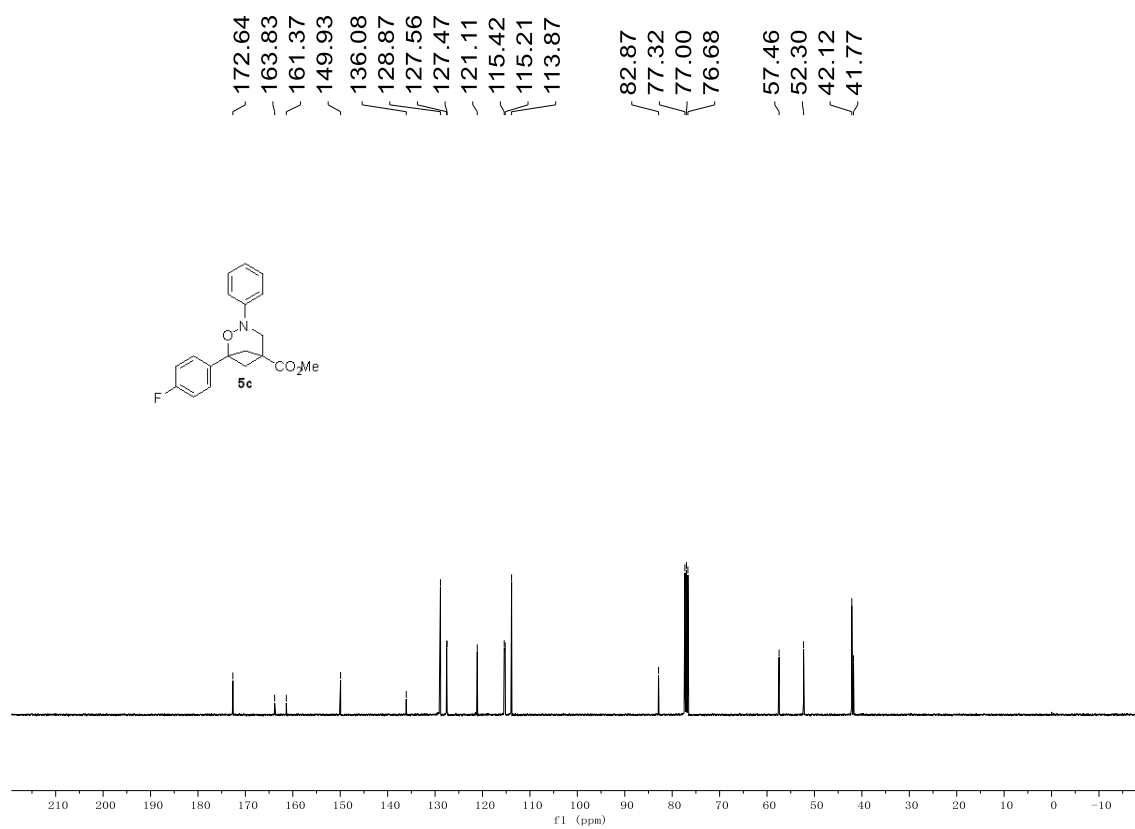

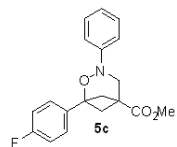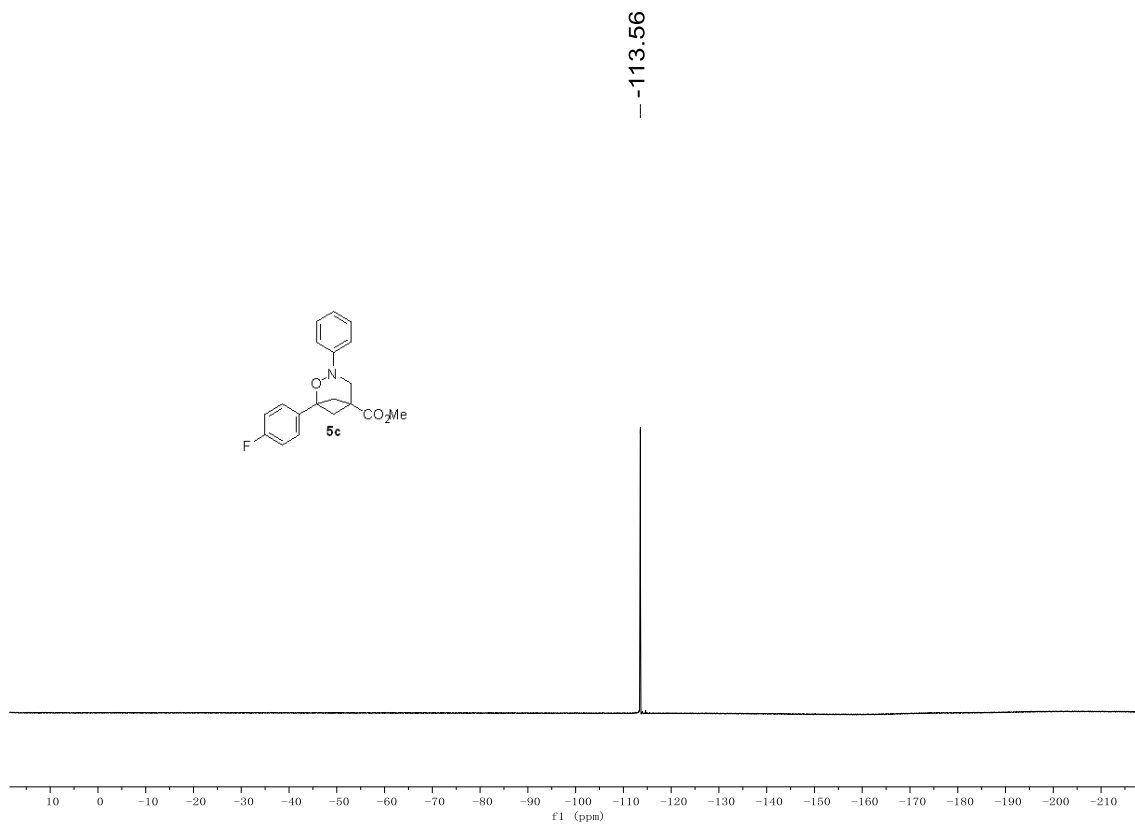

**Methyl 3-phenyl-1-(m-tolyl)-2-oxa-3-azabicyclo[3.1.1]heptane-5-carboxylate (5d)**

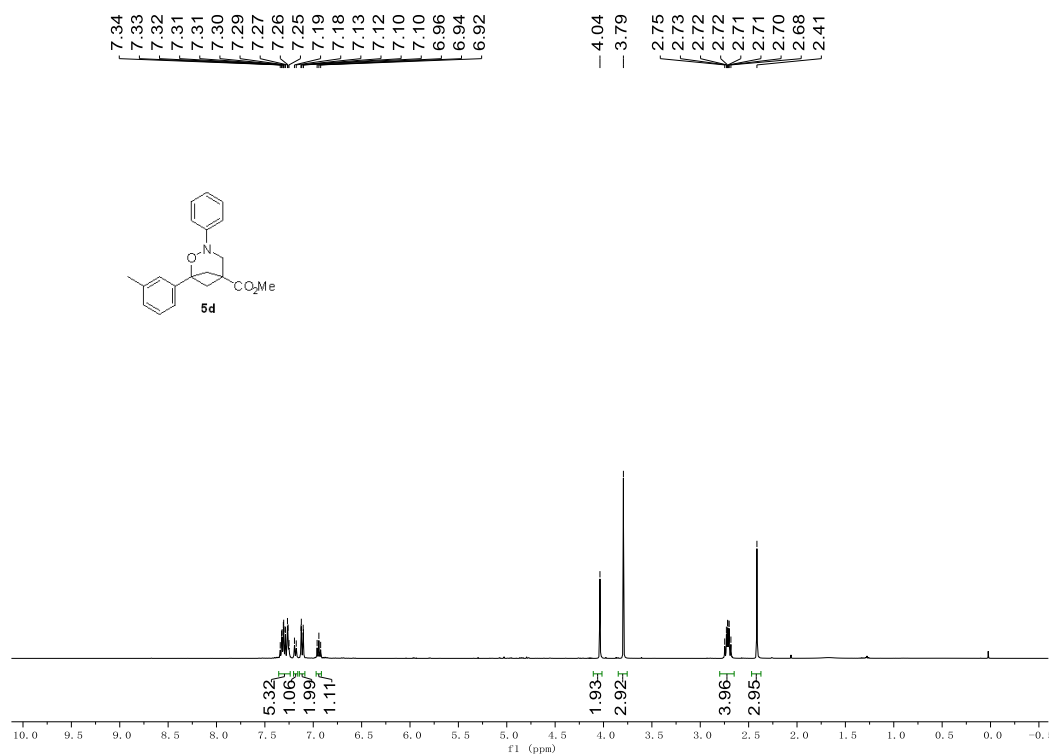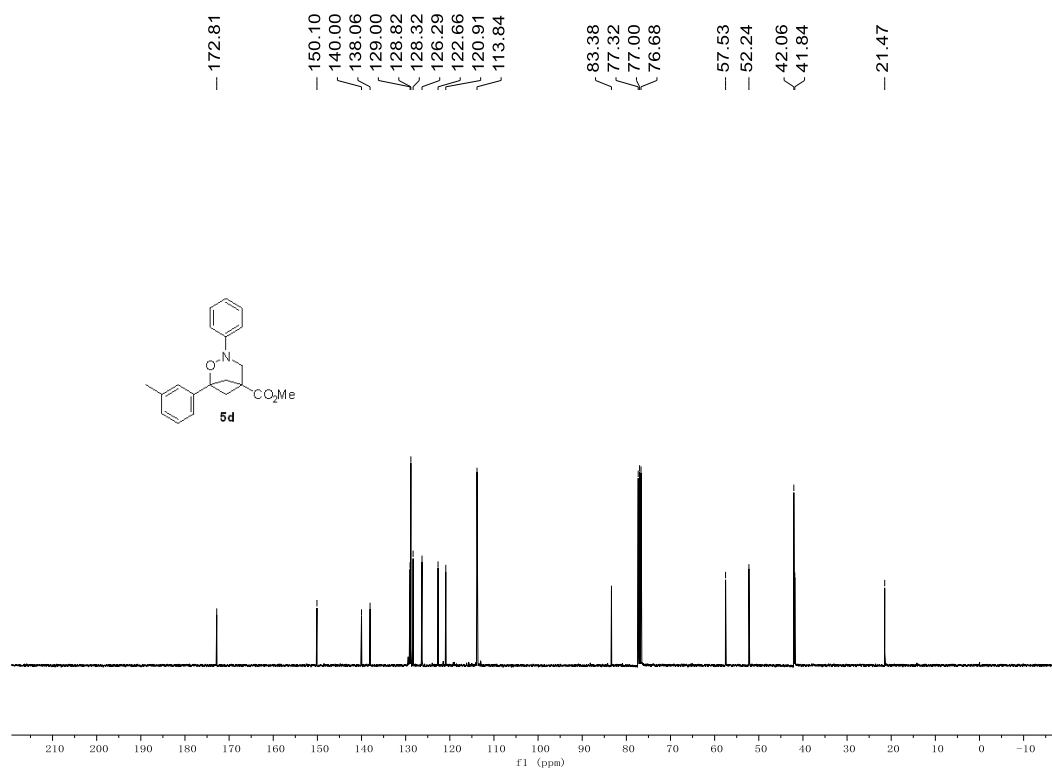

Methyl 3-phenyl-5-(4-(trifluoromethyl)phenyl)-2-oxa-3-azabicyclo[3.1.1]heptane-1-carboxylate (5e)

7.69, 7.67, 7.59, 7.57, 7.34, 7.32, 7.31, 7.30, 7.26, 7.11, 7.09, 6.98, 6.96, 6.95, 4.04, 3.80, 2.77, 2.74, 2.73, 2.71

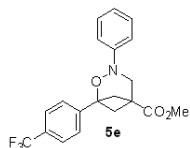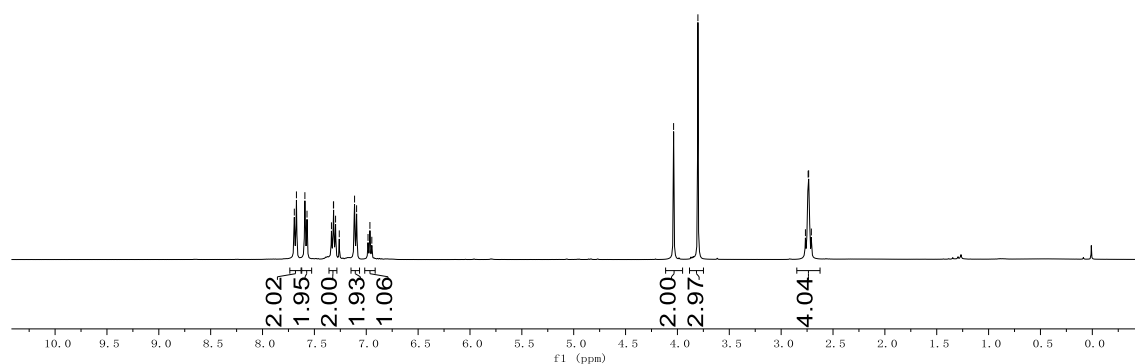

172.48, 149.79, 143.75, 130.88, 130.56, 130.23, 129.91, 128.91, 128.05, 126.03, 125.50, 125.47, 125.43, 125.39, 125.35, 122.64, 121.36, 119.94, 113.98, 82.81, 77.32, 77.00, 76.68, 57.62, 52.37, 42.28, 41.82

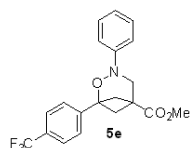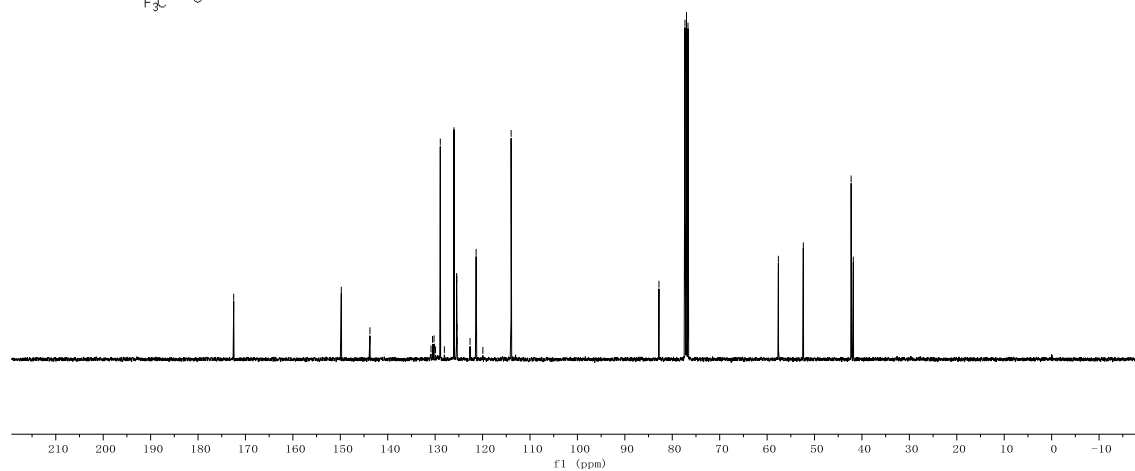



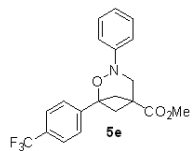

--62.57

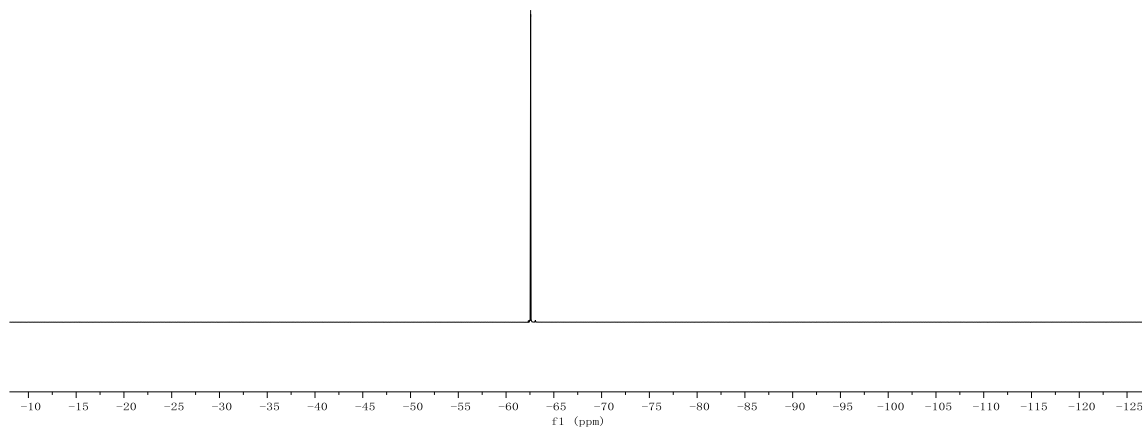

**Methyl 5-(3-fluorophenyl)-3-phenyl-2-oxa-3-azabicyclo[3.1.1]heptane-1-carboxylate.(5f)**

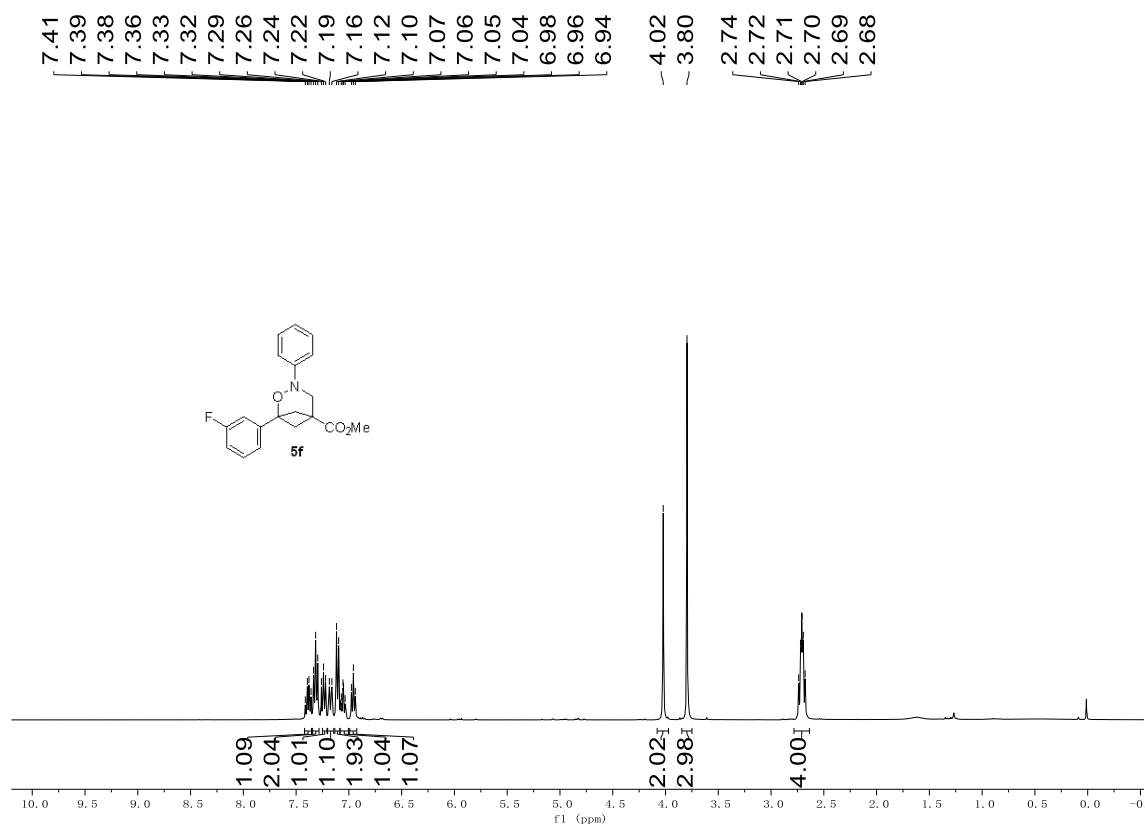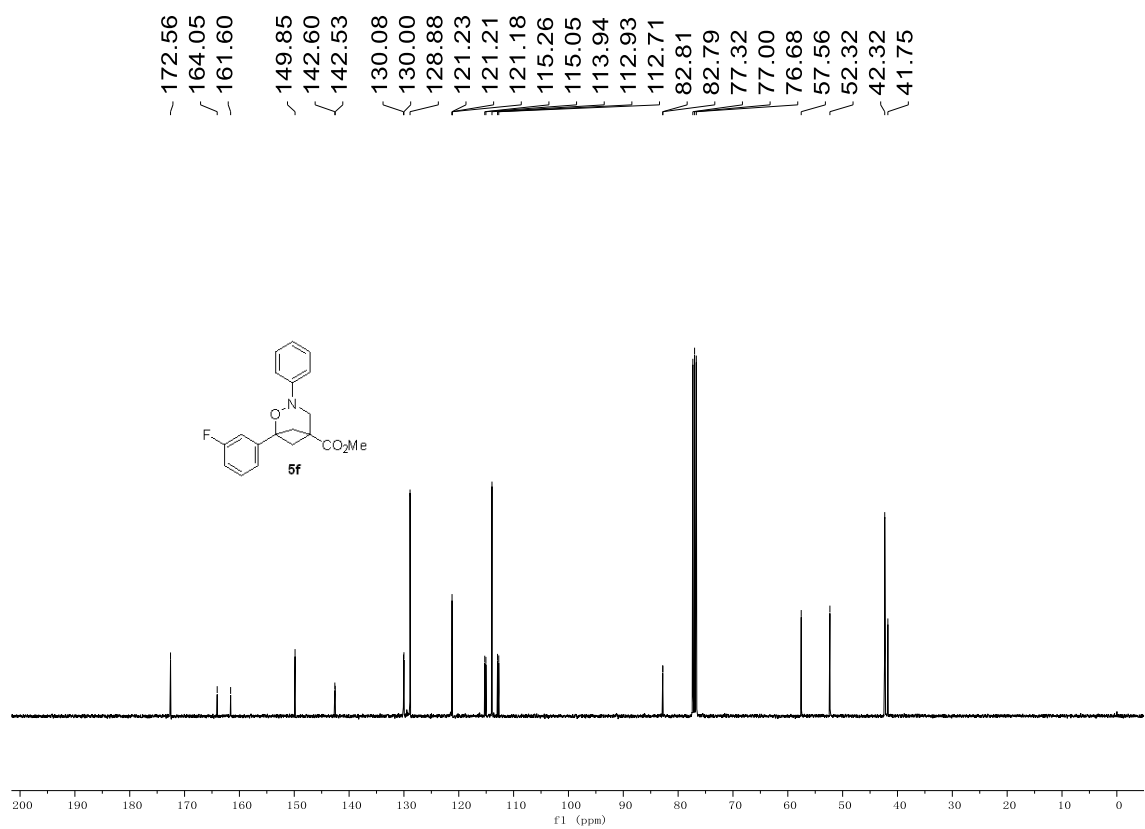

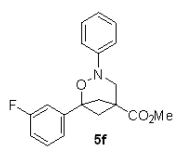

--112.59

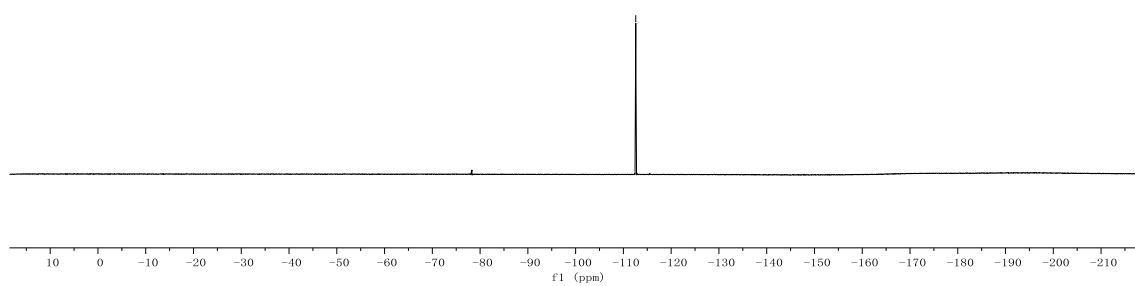

**Methyl 5-(3-methoxyphenyl)-3-phenyl-2-oxa-3-azabicyclo[3.1.1]heptane-1-carboxylate.(5g)**

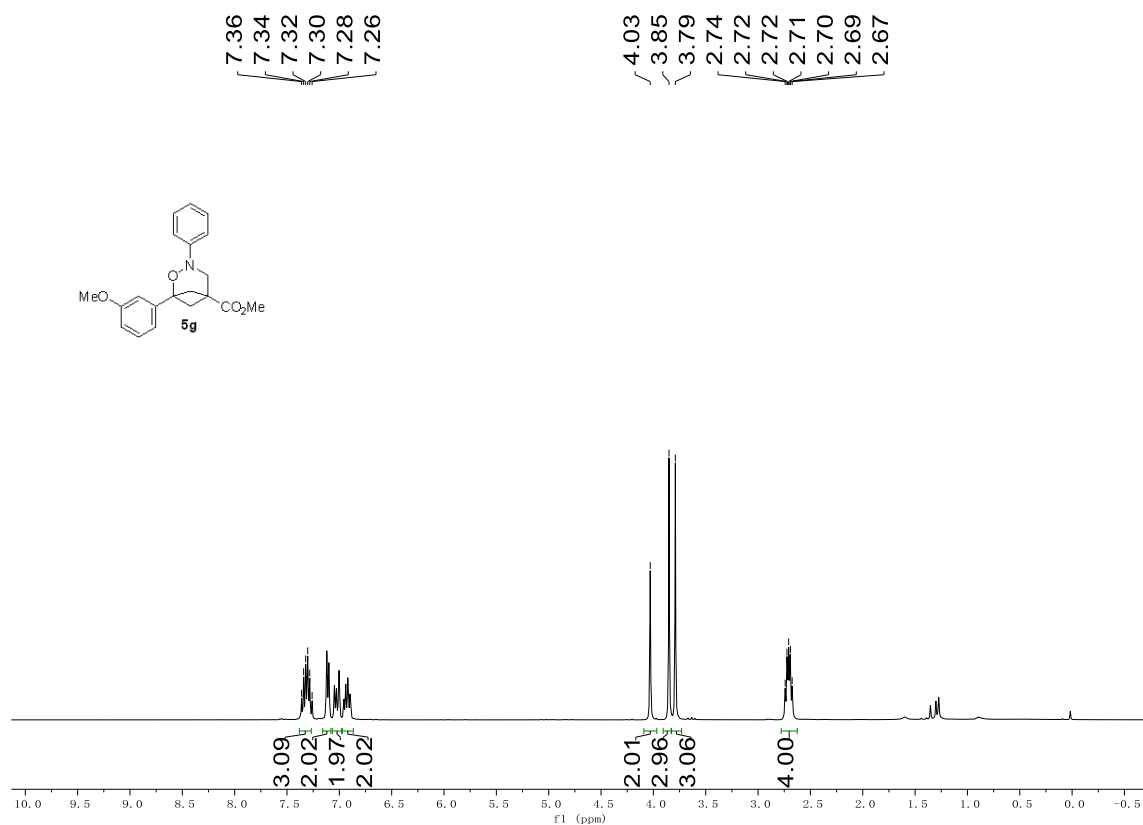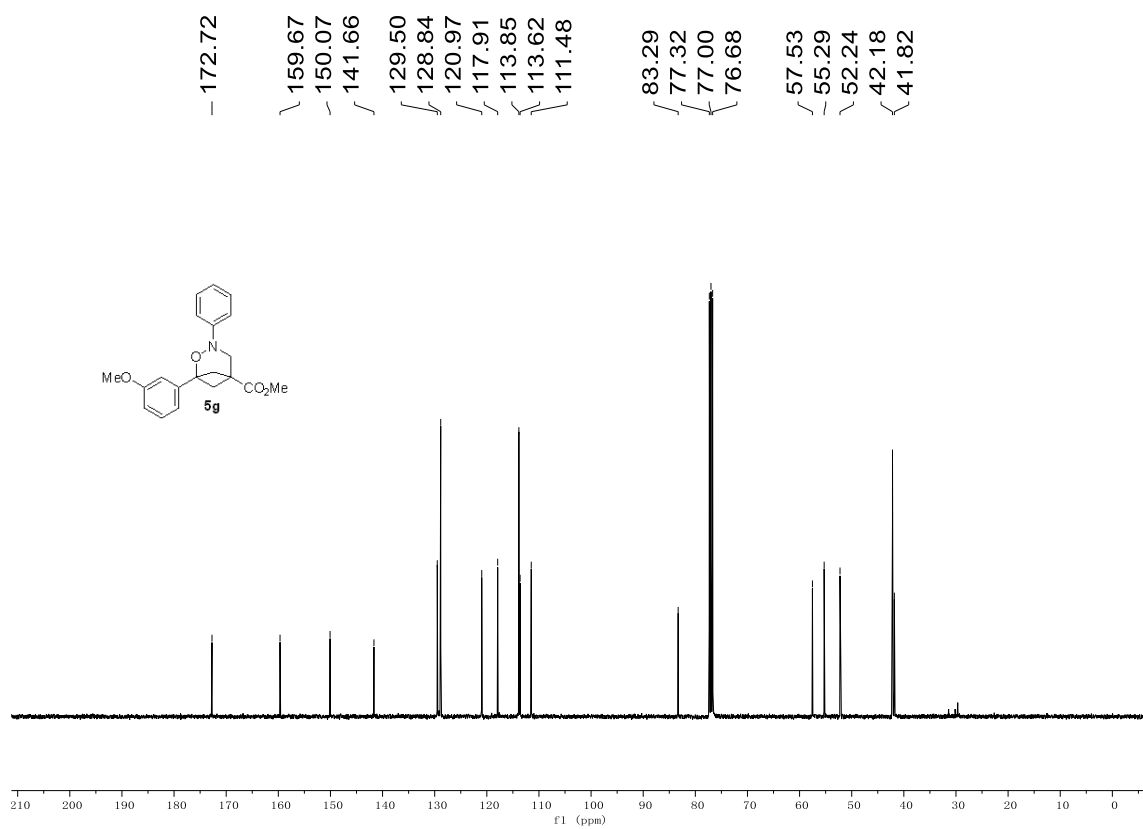

***tert*-butyl 3,5-diphenyl-2-oxa-3-azabicyclo[3.1.1]heptane-1-carboxylate. (5h)**

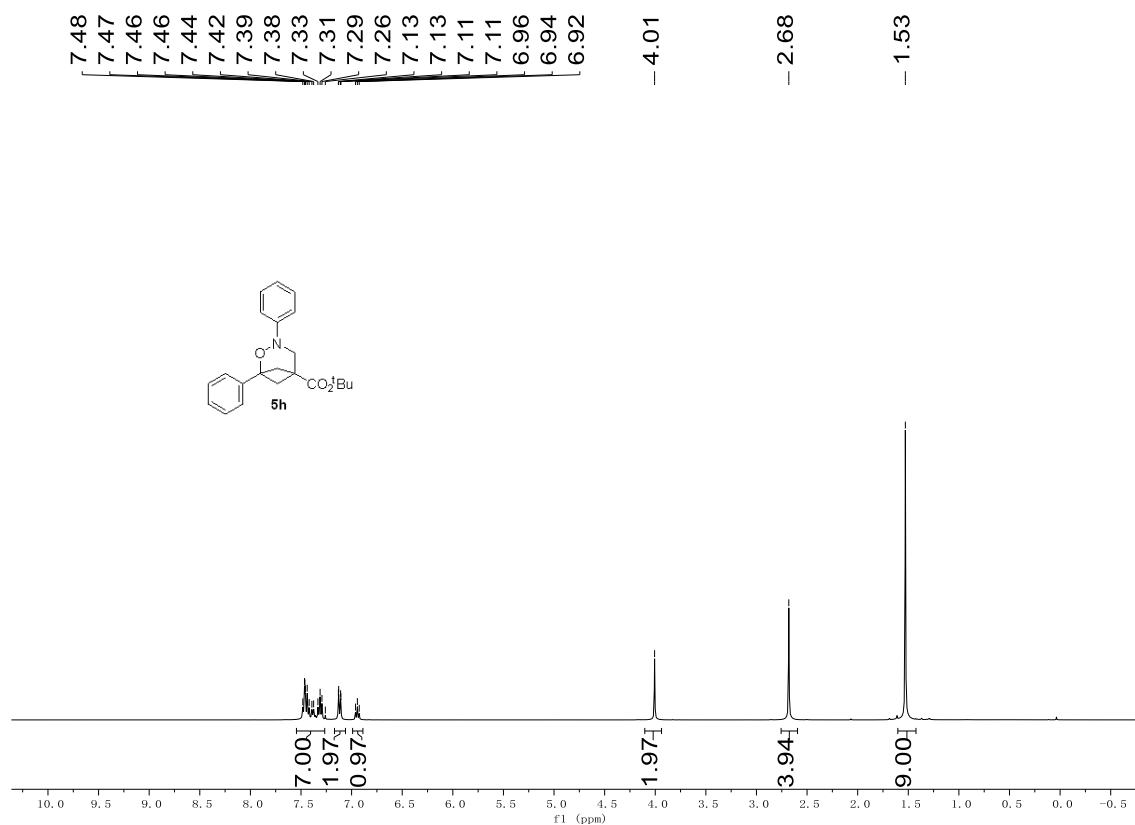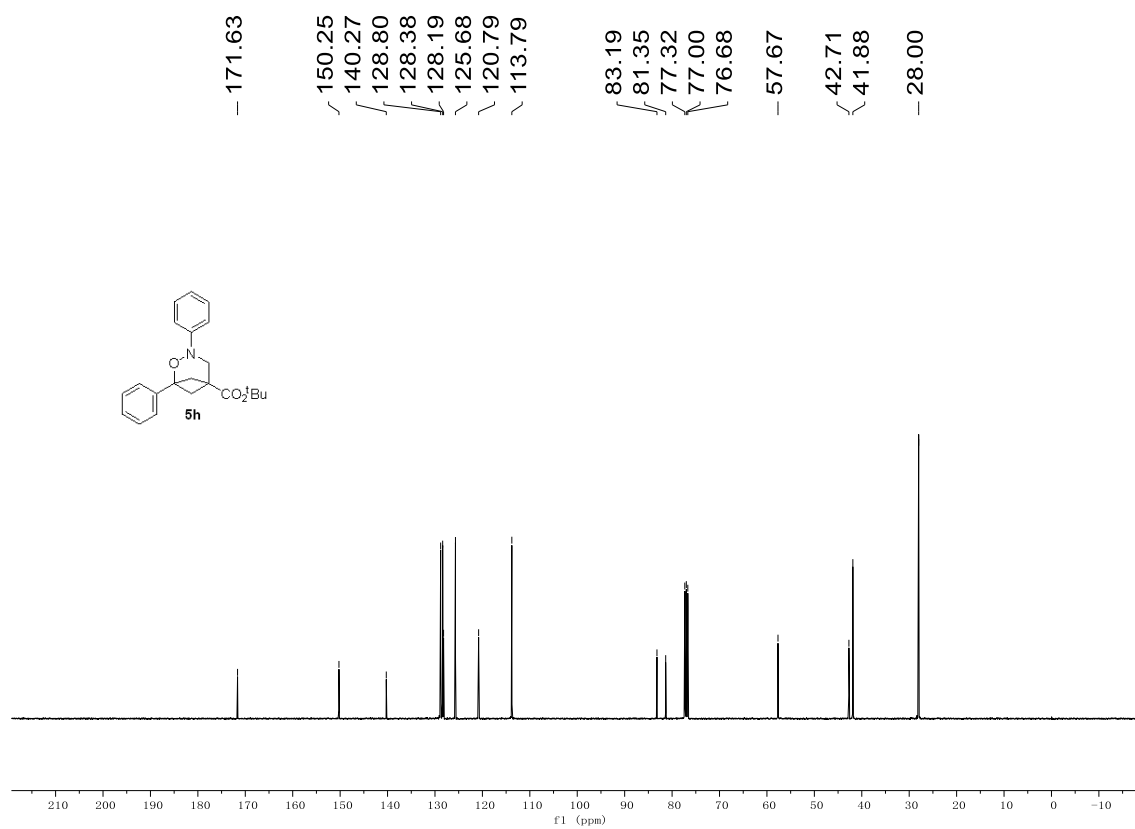

**(3,5-diphenyl-2-oxa-3-azabicyclo[3.1.1]heptan-1-yl)(morpholino)methanone. (5i)**

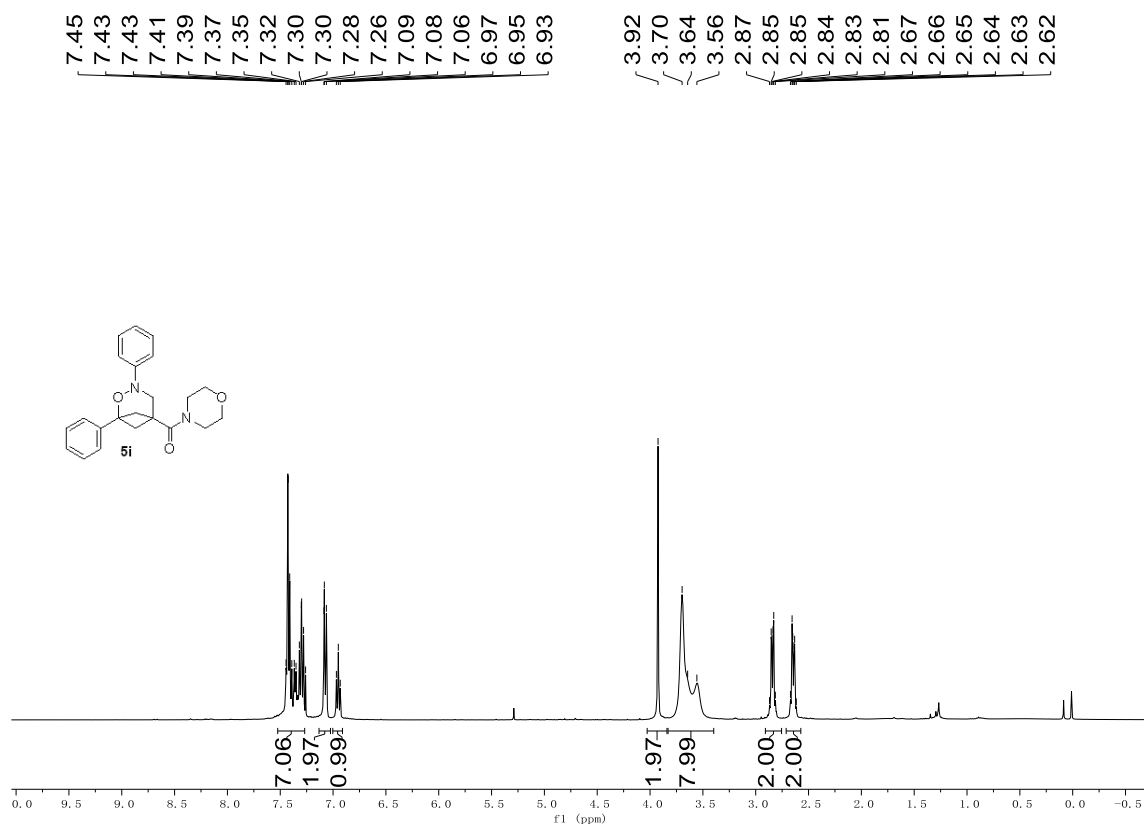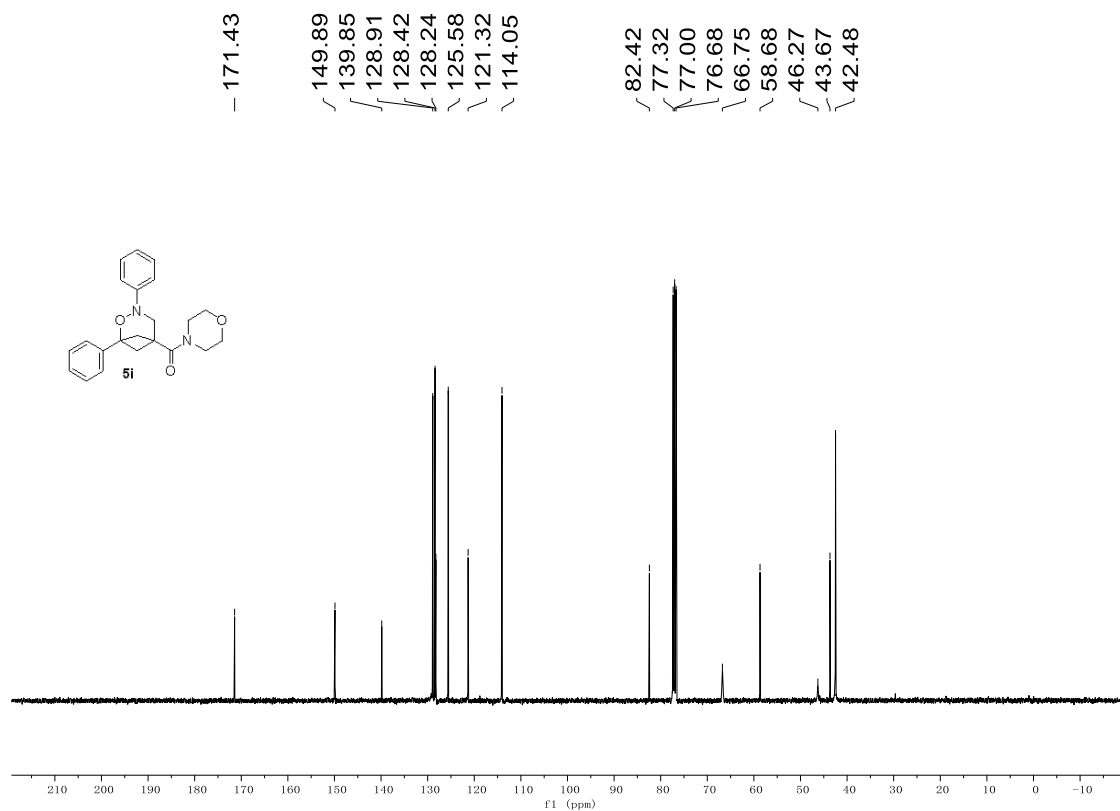

(E)-3,7-dimethylocta-2,6-dien-1-yl

3,5-diphenyl-2-oxa-3-azabicyclo[3.1.1]heptane-1-

carboxylate.(5j)

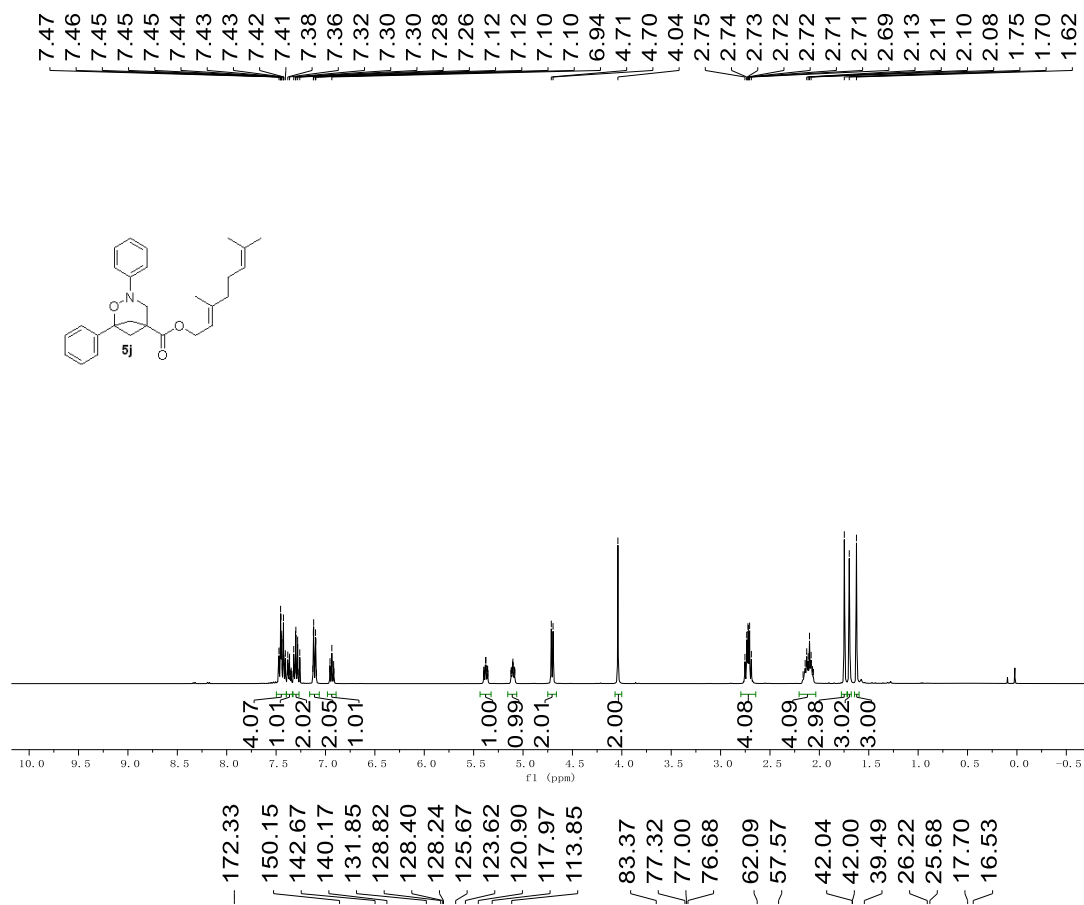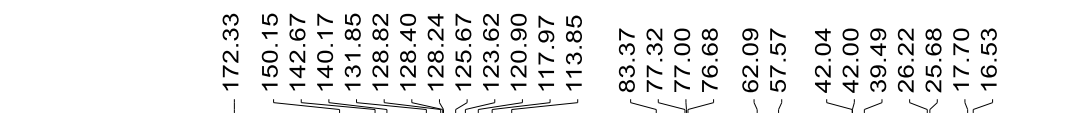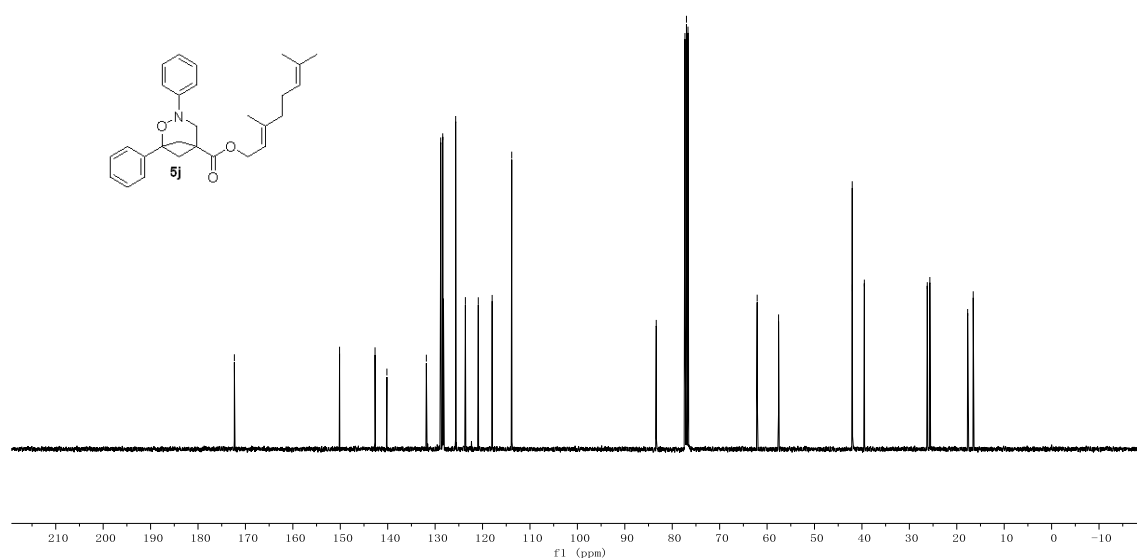

***N,N*-dibenzyl-1-hydroxy-3-((phenylamino)methyl)cyclobutane-1-carboxamide (6a)**

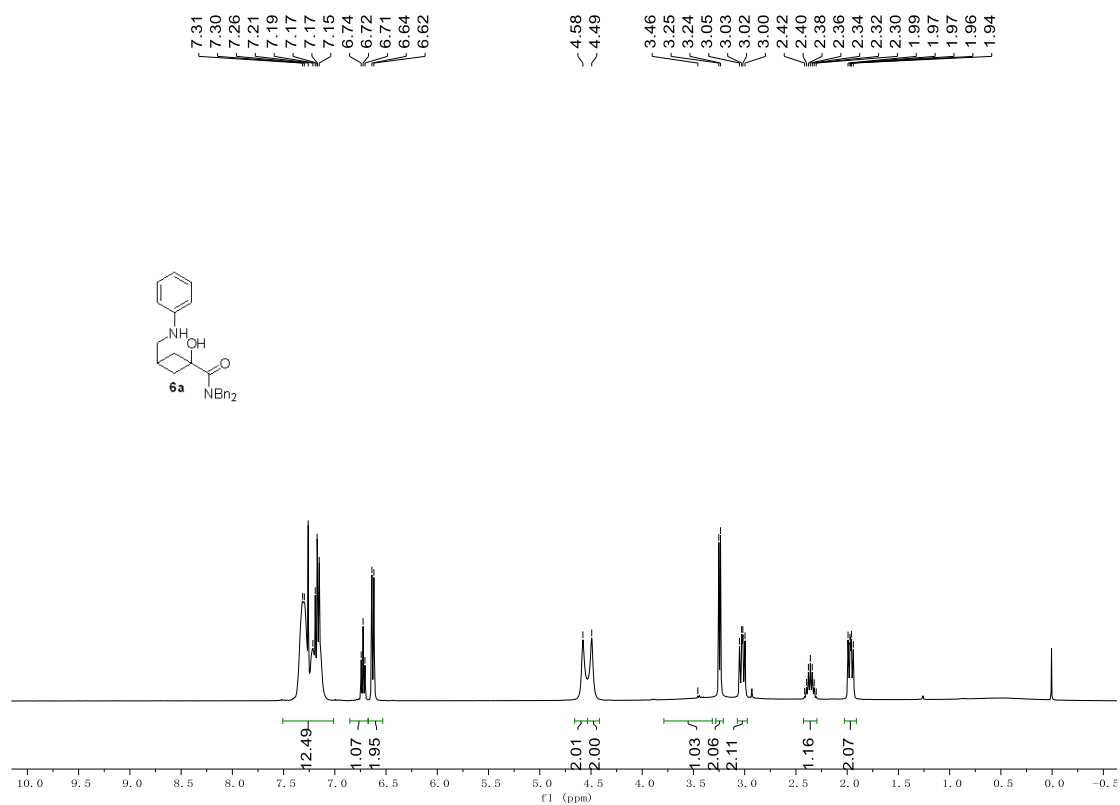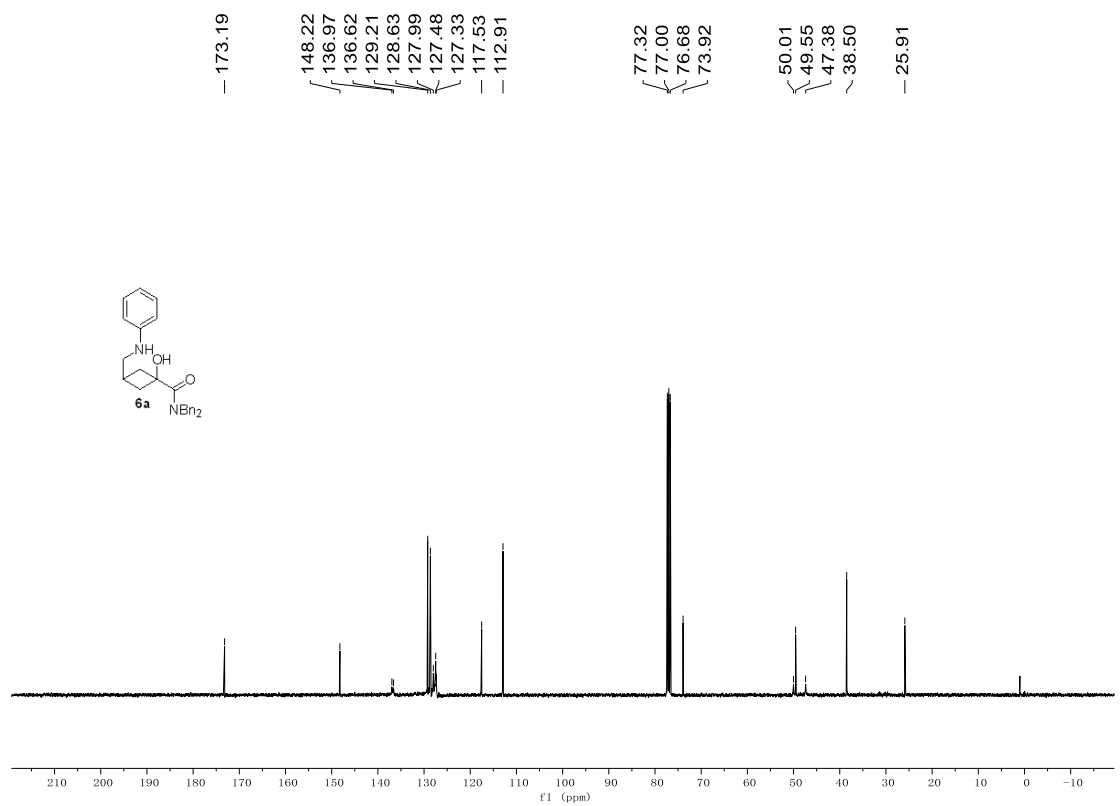



**1-Hydroxy-N-methyl-N-phenyl-3-((phenylamino)methyl)cyclobutane-1-carboxamide.(6b)**

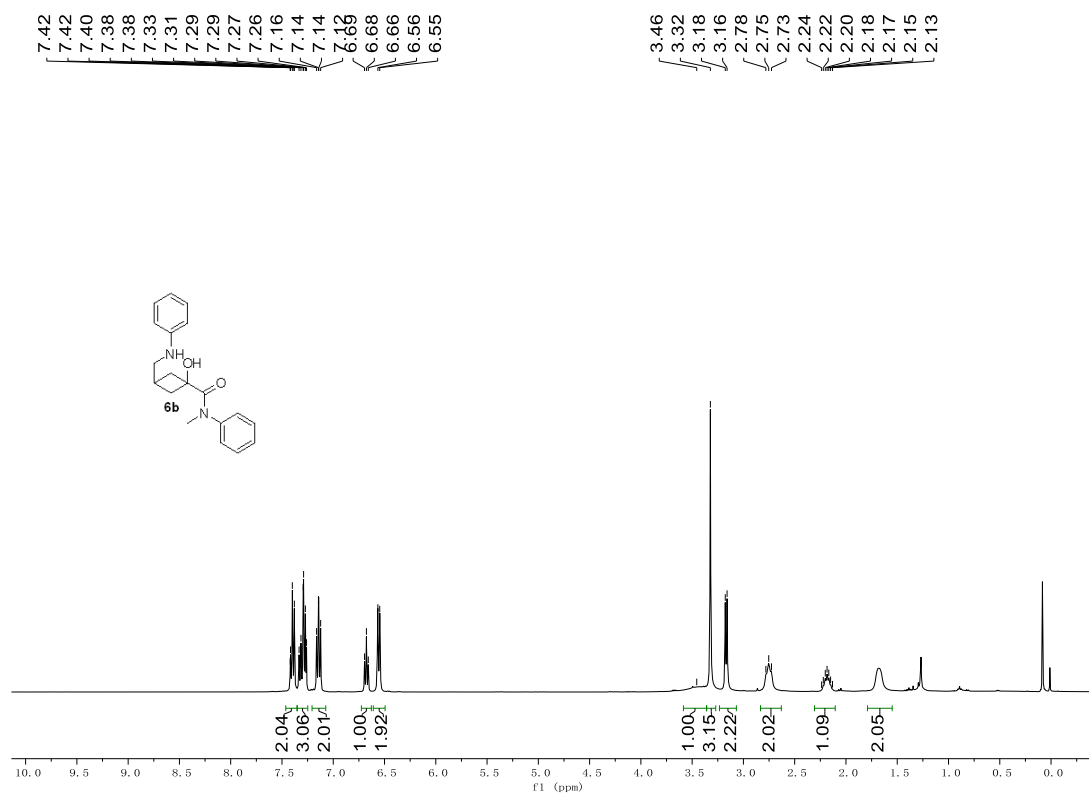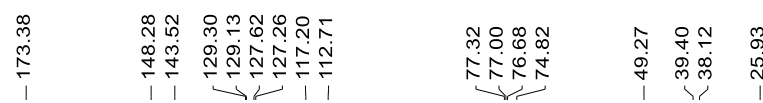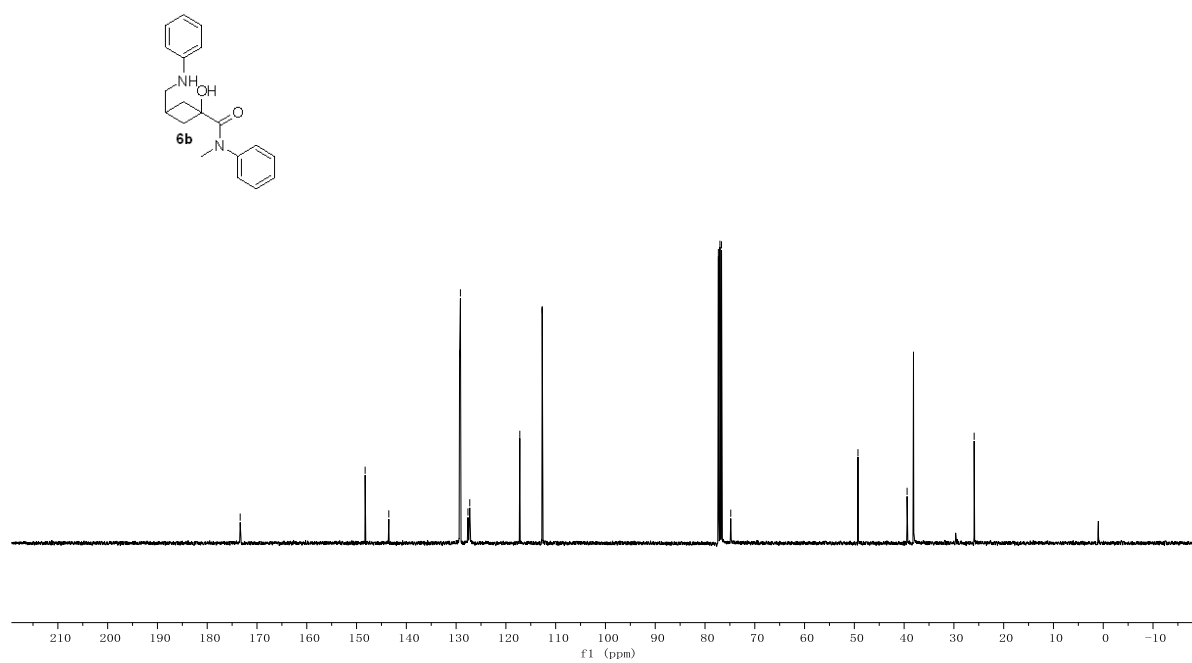

**Methyl 3-hydroxy-3-phenyl-1-((phenylamino)methyl)cyclobutane-1-carboxylate.(7a)**

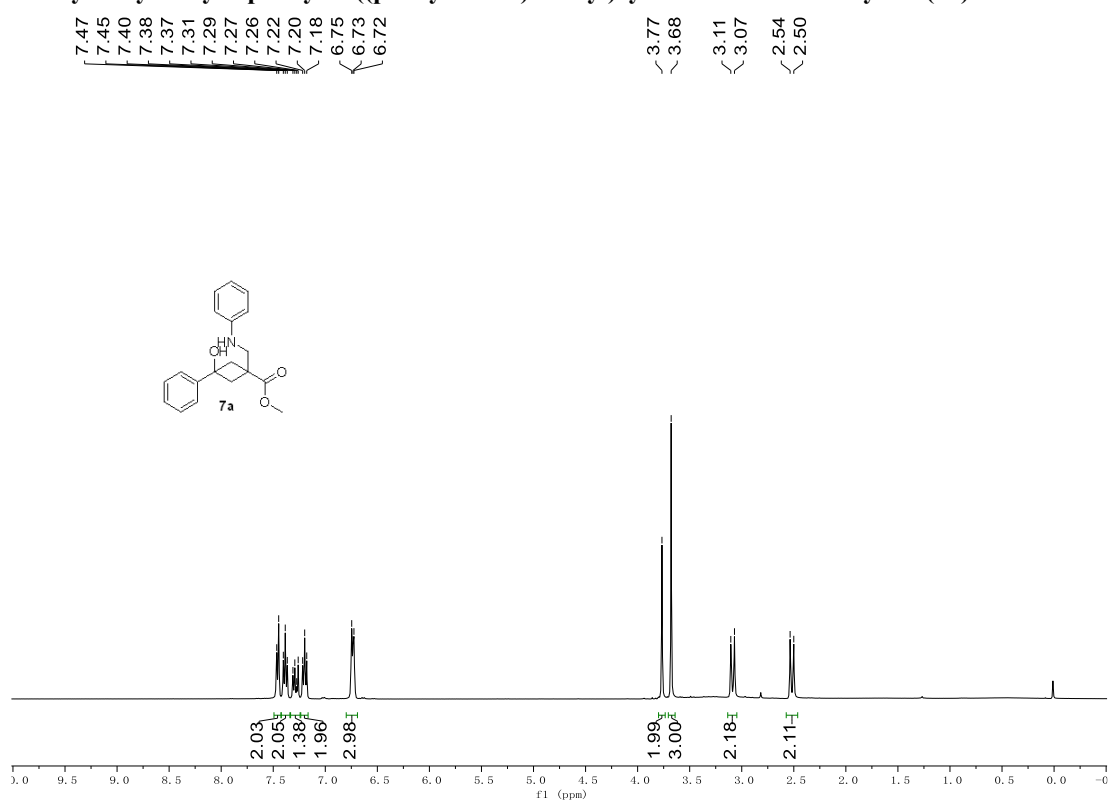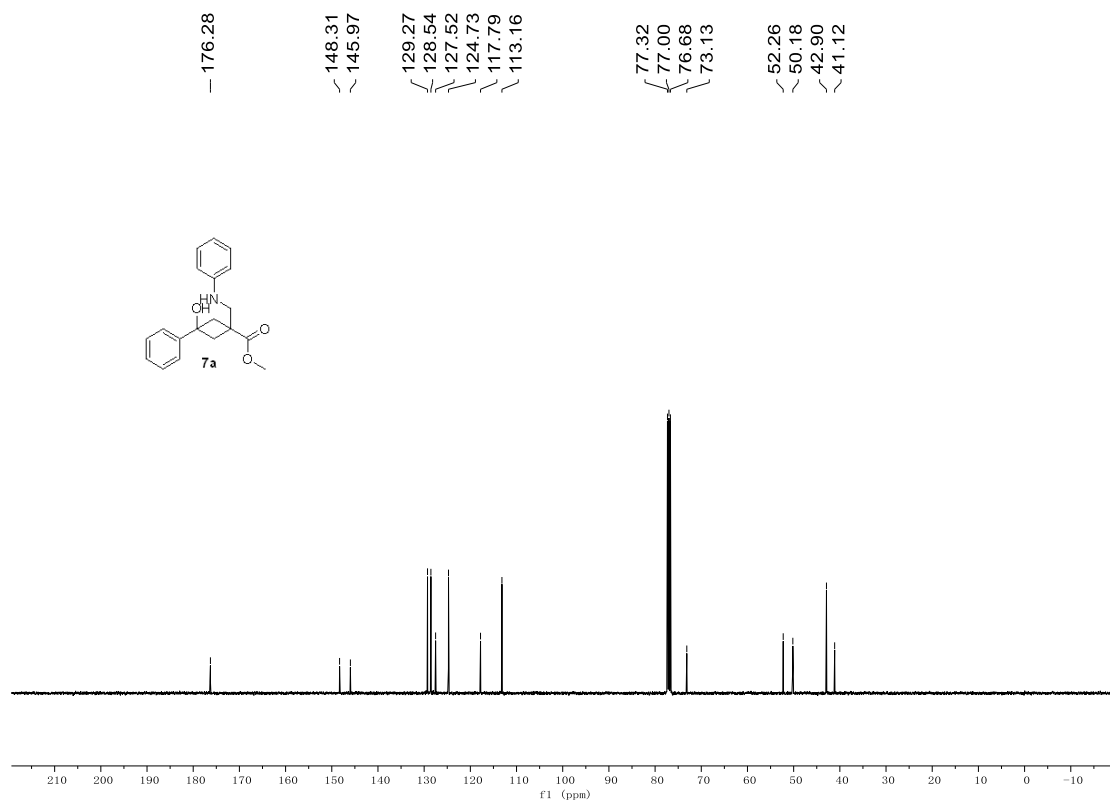

**Methyl 3-(4-fluorophenyl)-3-hydroxy-1-((phenylamino)methyl)cyclobutane-1-carboxylate.(7b)**

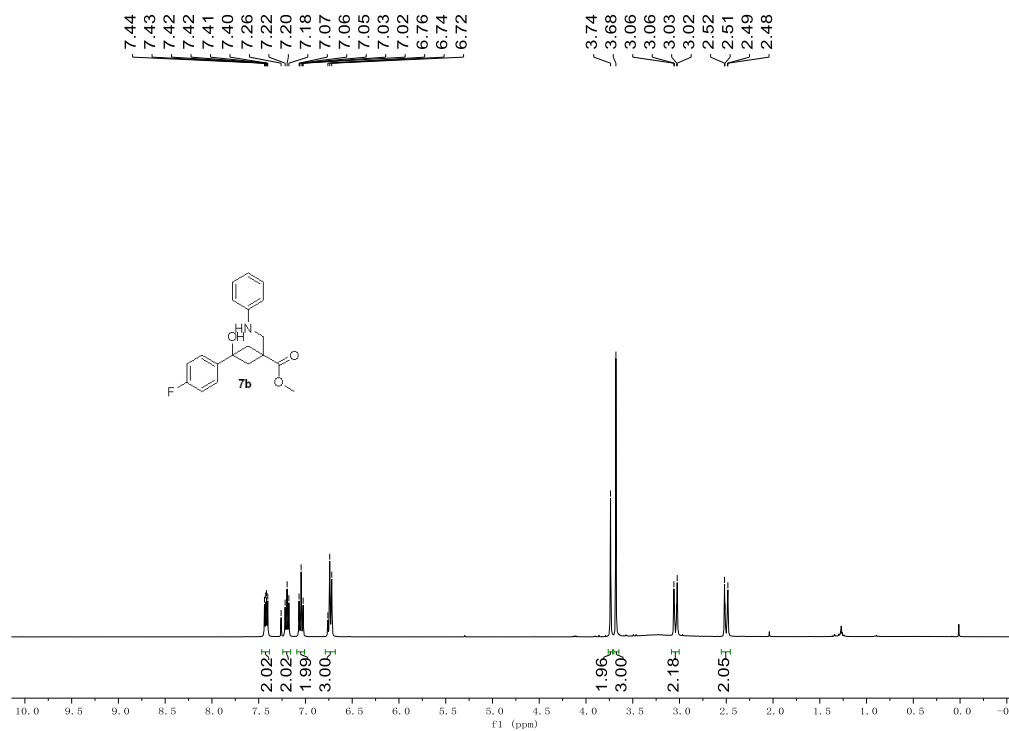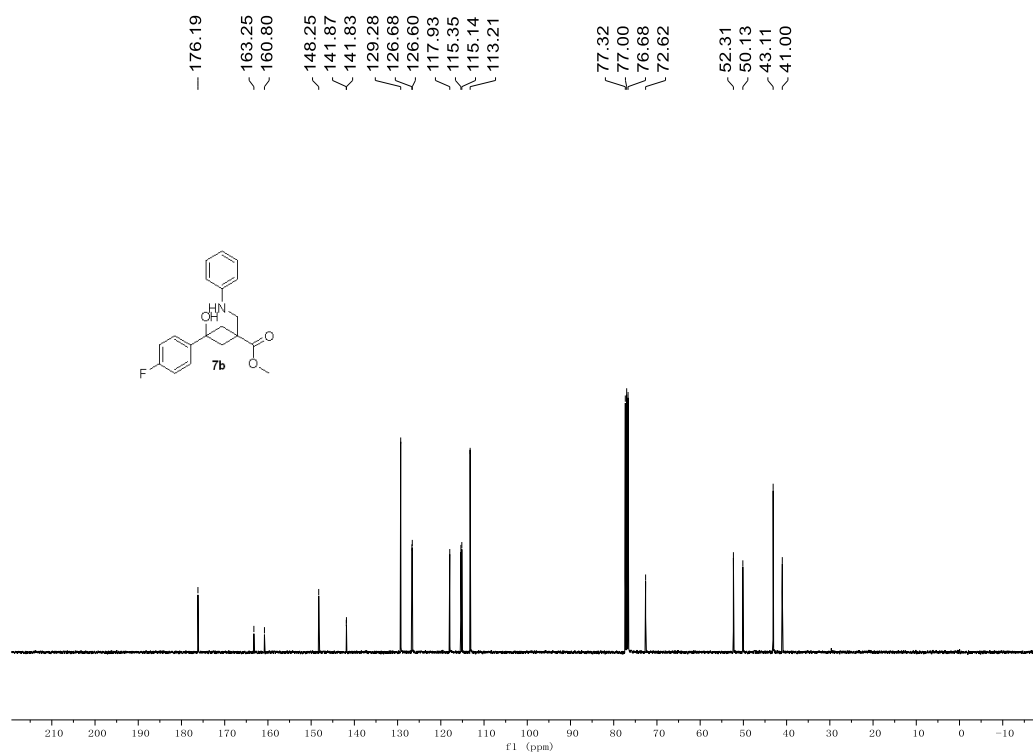

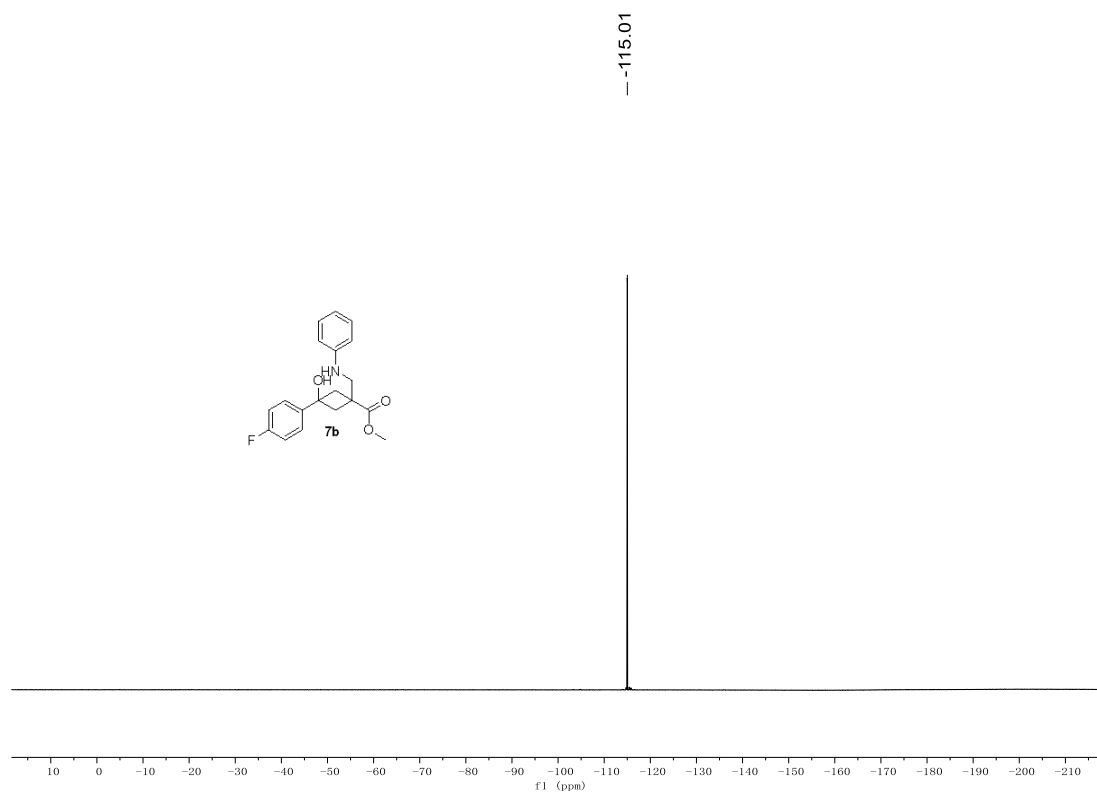

HMBC spectrum of **6a** in CDCl<sub>3</sub> (600 MHz)

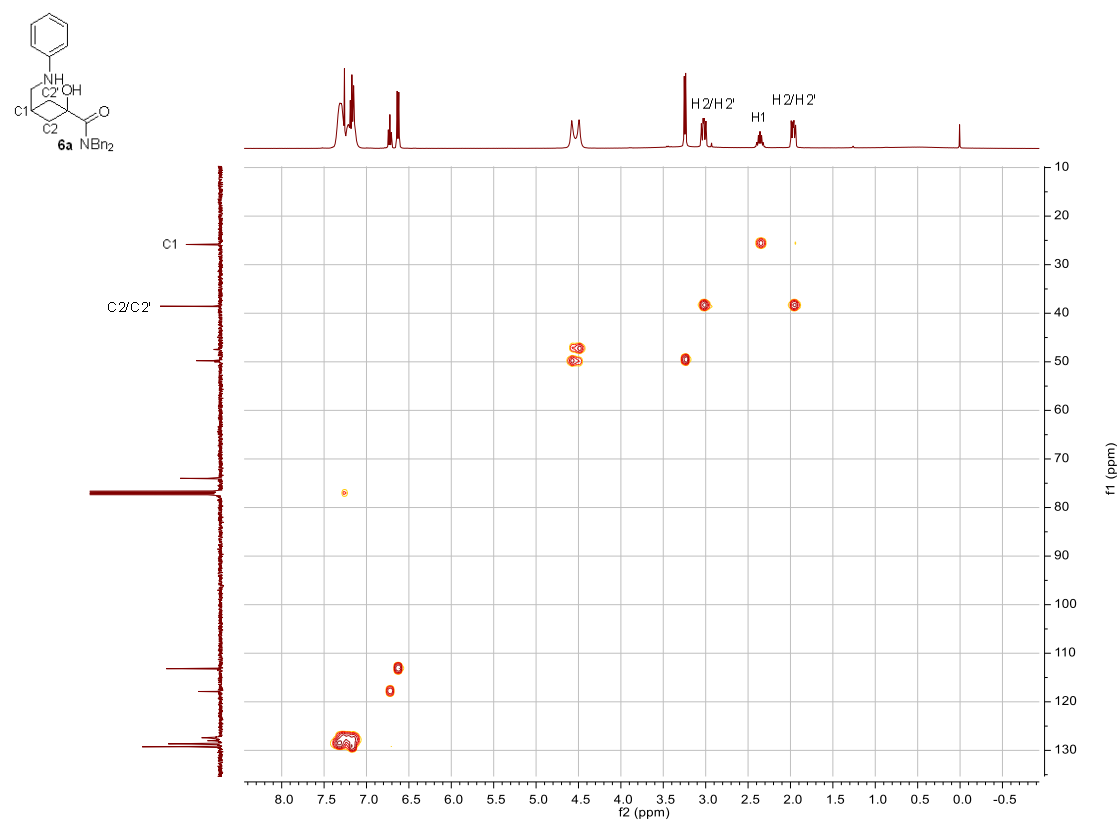

$^1\text{H}$  -  $^1\text{H}$  COSY spectrum of **6a** in  $\text{CDCl}_3$  (600 MHz)

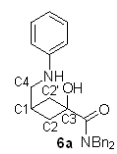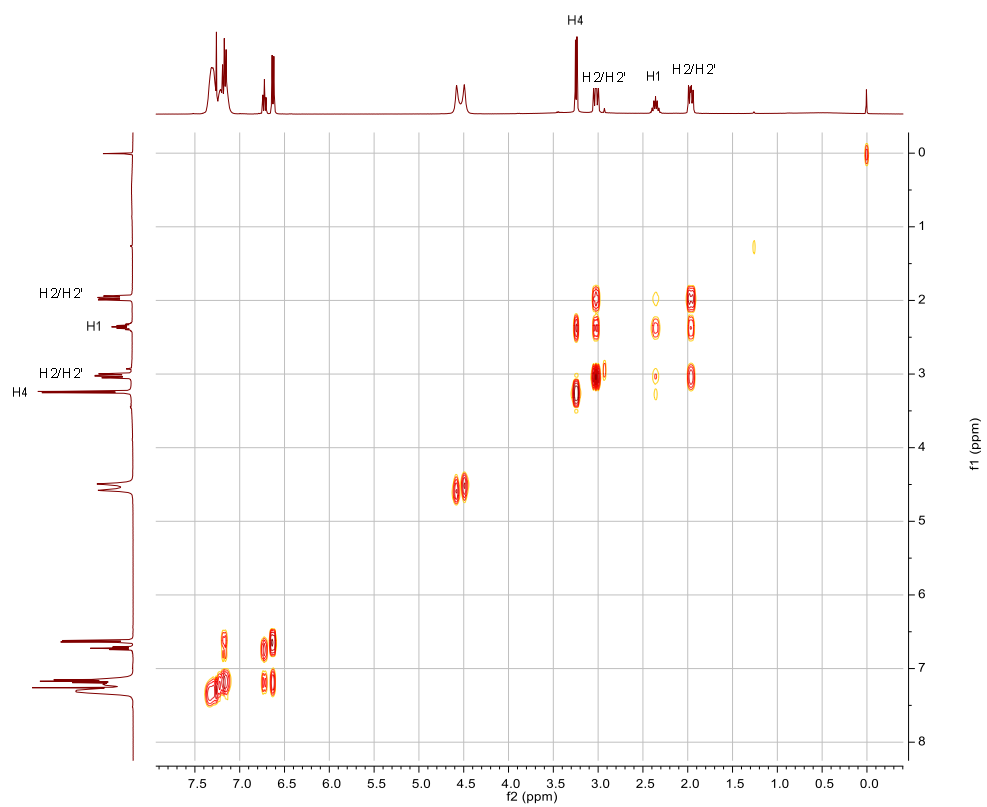

Supplement: d4gc05355a1.pdf [file d4gc05355a1.pdf]
